# Supplementary material for: Benefits and harms of medical cannabis: a scoping review of systematic reviews
Source: Syst Rev. 2019 Dec 10;8:320. doi: 10.1186/s13643-019-1243-x (PMC6905063; doi:10.1186/s13643-019-1243-x)
Supplement: Supplementary file 5 — Additional file 5. Data extractions from included studies. [file 13643_2019_1243_MOESM5_ESM.xlsx]

## Sheet: Data Extraction
General Characteristics										Methods																						General results						Results for specific analyses and outcomes											CONCLUSIONS AND ADVERSE EVENTS
Ref	Type of report	Journal Name	First author (last name, initial)	Year	Country of Corresponding Author	Country of First Author	Funding	Objective of SR	Intent of SR	Databases Searched	Total # of databases searched	Search dates	Selection criteria	Protocol reported	How was medical marijuana use defined?	Where was MM use defined?	Type of cannabis	Type of cannabis_comment	Comparator (as defined in methods)	ICD-10	Second ICD-10	Third ICD-10	Specific Conditions/illnesses	Setting defined	Population	Sex	Special populations (e.g. pregnancy)	Indication for prescription	Outcomes specified a priori?	Outcomes defined?	Quality assessment tool used	Total # studies on medical cannabis	Total # participants for included cannabis studies	Range of participants for included cannabis studies	Study designs included	Various study designs (list)	Populations in included studies	Type of analysis	Type of analysis (comment)	Illness/condition (as relates to following outcomes)	Intervention	Comparator	Pain taxonomy (if applicable to this outcome)	Other pain (list)	Results for pain outcomes	Other outcomes reported (list per row)	Results for other outcomes	Comments	General conclusions
12	Published SR	PharmacoEconomics	Herzog, S	2017	Australia	N/A	No funding	"we sought to review the economic costs and benefits of prescribed CBMs, in any chronic illness, and understand the frameworks used to evaluate this unique class of drugs. Specifically, we sought to inform the methods of our within-trial and modelled economic evaluation, particularly the choice of health outcomes, the instruments used for utility-based health-related quality of life (HRQoL), and …	Soley focused on medical cannabis	Medline, Embase, PreMedline, PsychINFO, CINAHL, EconLit, Tufts' Cost-Effectivenesss Analysis Registry, NHS Economic Evaluation Database	8	Inception - mid-december 2016	Studies in any language that presented data on costs and/or economic benefits of prescribed CBMs in adult patients taking these medicines were included. We included studies that were full economic evaluations, costing studies, WTP studies, health economics-based patient preference studies (e.g. discrete choice experiments) and clinical trials or other studies that measured utility-based HRQoL (wi…	Protocol completed, and link and/or registration # reported	Prescribed cannabis-based medicines (CBMs), including dronabinol, nabilone and nabiximols (or Sativex) as well as other preparations such as vaporised cannbis plant matter and cannabinoid extracts	Introduction	Plant-derived cannabinoids (e.g. THC, cannabidiol, THCV, nabiximols (e.g.Sativex))	Sativex: "a cannabis plant extract containing a roughly 1:1 ratio of THC and cannabidiol"	NR	Diseases of the nervous system			"Chronic illness" (all included studies were on multiple sclerosis)	NR	Adults (18+)	Not reported	N/A	Chronic illness	Yes	No	GRADE, QHES checklist, and CHEERS checklist	10	NR	NR	Various (specify in column Ak)	RCT, Economic evaluations, cohort and Willingness-to-pay (WTP) study	Adults (18+)	Authors' text	Narrative	Multiple sclerosis	Nabiximols	Standard care (antispasticity drugs)	N/A	N/A		Maintenance of treatment gains	Reported study-by-study without synthesizing results		Prescribed CBMs are a potentially cost-effective add-on treatment for MS spasticity; however, this evidence is uncertain. Further investment in randomised trials with in-built economic evaluations is warranted for a wider range of clinical indications. Key Points: Economic evaluations of prescribed cannabis-based medicines are few in number and limited to indications for managing multiple scleros…
12																																						Authors' text	Narrative	Multiple sclerosis	Nabiximols	Standard care (antispasticity drugs)	N/A	N/A		QOL	Reported study-by-study without synthesizing results
12																																						Authors' text	Narrative	Multiple sclerosis	Nabiximols	Standard care (antispasticity drugs)	N/A	N/A		utility-based HRQoL	Reported study-by-study without synthesizing results
16	Published SR	J Neurol Neruosurg Psychiatry	Claflin, SB	2018	Australia	N/A	Not reported	"we reviewed CAM studies on CAM interventions for MS published from 2001 onwards, presenting class I and class II evidence of efficacy and summarising their findings. We will broadly assess the most recent evidence of CAM efficacy, identify common potential sources of bias and suggest methodological improvements for further development of the field. Our goal is to provide an overview of the moder…	Various CAM interventions (cannabis being one)	PubMed	1	NR; searched on Jan 17, 2018	1. Must be a full research article—this review did not include study protocols or abstracts. 2. Must be published in the period between 1 January 2001 and 18 January 2017, as 2001 was the first year that the McDonald criteria for MS diagnosis were published, which may improve uniformity in MS diagnosis. 3. Must be in English. 4. Must have only human participants. 5. Must test the effect of a CAM …	Not reported	Not specifically defined. Lumped with CAM [complementary and alternative medicines] interventions and authors "…broadened the WHO definition of CAM to a non-invasive therapy used in addition to or in lieu of the standard pharmacological treatment of MS."	Not defined	Plant-derived cannabinoids (e.g. THC, cannabidiol, THCV, nabiximols (e.g.Sativex))	Sativex, THC	NR	Diseases of the nervous system			Multiple sclerosis	NR	Not reported	Not reported	N/A	Treatment of MS and associated symptoms	No	No	Evidence-Based Spine-Care Journal (2013)'s standard	7	1746	NR	RCTs or quasi-RCTs	N/A	Not reported	Authors' text	Narrative synthesis	Multiple sclerosis	Cannabis extract (including Sativex)	Placebo	Pain	Not specified	Favours intervention	Incontinence	Favours intervention	Three double-blind RCTs with sample sizes ranging from 64 to 224 and 225 participants presented class I evidence	There is a great deal of interest in CAM treatment options within the MS community. Unfortunately, efficacy studies of CAM treatments present significant challenges, and as this review demonstrates, there is little class I and class II evidence of their effect in the literature. The impact of CAM treatments should be assessed more rigorously in future research.
16																																						Authors' text	Narrative synthesis	Multiple sclerosis	Cannabis extract (including Sativex)	Placebo				Spasticity	Favours intervention	Three double-blind RCTs with sample sizes ranging from 64 to 224 and 225 participants presented class I evidence
16																																						Authors' text	Narrative synthesis	Multiple sclerosis	Cannabis extract (including Sativex)	Placebo				Muscle stiffness	Favours intervention	Class II evidence from two double-blind RCTs demonstrates a significant improvement in spasticity and patient-reported muscle stiffness compared with placebo. These studies are high quality, with sample sizes of 189 and 279 participants analysed, respectively.
16																																						Authors' text		Multiple sclerosis	Cannabis extract	Placebo				VAS of individual's most troublesome symptom	Reported study-by-study without synthesizing results	Two other high-quality studies found no effect of cannabis extract on primary outcomes. Wade et al found no effect on the visual analogue score of the individual’s most troublesome symptom (n=154). Zajicek et al found no effect on spasticity (n=611)
16																																						Authors' text		Multiple sclerosis	THC	Placebo				Incontinence	Reported study-by-study without synthesizing results
16																																						Authors' text		Multiple sclerosis	THC	NR				Spasticity	Reported study-by-study without synthesizing results
22	Published SR	Disability and Rehabilitation	Behm, K	2017	Australia	N/A	Not reported	"The purpose of this review is to synthesise and critically appraise the results of investigations into the effect of symptom-controlling medication on gait outcomes in people with MS."	Various pharmaceutical interventions (cannabis being one)	Medline, Embase, AMED, Cochrane (CENTRAL), and CINAHL	5	"until 30 November 2016"	"the intervention was required to be a symptom controlling medication, prescribed to address a symptom associated with MS, e.g., spasticity or gait dysfunction. Where a study described multiple interventions, studies were included if medication effects could be partitioned from other intervention effects. Outcomes had to include an objective gait measure, although not necessarily as the primary o…	Not reported	Not defined	Not defined	Various types	smoked cannabis, nabiximols, Sativex, THC	NR	Diseases of the nervous system			Multiple sclerosis	NR	Adults (18+)	Not reported	N/A	Gait disturbances	Yes	No	PEDro scale	4	NR	NR	RCTs or quasi-RCTs	N/A	Adults (18+)	Authors' text	Reported study-by-study	Multiple sclerosis	Smoked cannabis	Placebo				Gait speed	Reported study-by-study without synthesizing results		The effect of symptom-controlling medication on gait outcomes in adults with MS is varied. There were inconsistent findings about the effect of cannabinoid medications on gait speed; hence no confident conclusions can be made. Further high quality research with thorough gait outcomes that assess both quantitative and qualitative aspects of gait are required to determine the effectiveness, usefuln…
22																																						Authors' text	Reported study-by-study	Multiple sclerosis	Nabiximols	Placebo				Gait speed	Reported study-by-study without synthesizing results
22																																						Authors' text	Reported study-by-study	Multiple sclerosis	Sativex	Placebo				Gait speed	Reported study-by-study without synthesizing results
22																																						Authors' text	Reported study-by-study	Multiple sclerosis	Cannabinoid	Placebo				Gait speed	Reported study-by-study without synthesizing results
22																																						Authors' text	Reported study-by-study	Multiple sclerosis	THC	Placebo or cannabis extract				Gait speed	Reported study-by-study without synthesizing results
40	Published SR	Clinical Psychopharmacology and Neuroscience	Lim, K	2017	Singapore	N/A	Non-profit/academic	" Although reviews of preclinical and clinical studies have been conducted on movement disorders and psychosis, the aim of the present review is to provide a more in-depth evaluation of the efficacy of medical cannabinoids by appraising the quality of evidences from clinical studies across a broader range of neurodegenerative disorders and psychiatric conditions."	Soley focused on medical cannabis	PubMed, Embase, and the Cochrane Central Register of Controlled Trials	3	Inception to April 2017	Randomized controlled trials that compared and examined the pharmacological intervention of cannabis (in any preparation form, and any route of administration) with placebo or other active treatments were included. Other quantitative study designs such as cohort studies, retrospective chart review studies, and case studies were excluded. Opinion and discussion papers were also excluded. This revi…	Not reported	"Medial cannabis refers to the use of cannabis and its derivatives to treat disease and relieve symptoms."	Introduction	Various types	Smoked cannabis, natural or synthetic cannabinoid including, THC, cannabinol (CBN), cannabidiol, or combinations of abovementioned agents.	placebo, usual care, other types of active treatments, or derivatives of cannabis.	Diseases of the nervous system	Mental and behavioural disorders		movement disorders (e.g., dystonia, Huntington’s disease, Parkinson’s disease, Tourette syndrome), neurological conditions (e.g., Alzheimer’s disease, dementia, amyotrophic lateral sclerosis [ALS]) and psychiatric condition (e.g., psychosis, schizophrenia, anxiety)	NR	Mixed (adults and children)	Mixed	N/A	Disease symptoms	No	No	Cochrane RoB	24	480	NR	RCTs or quasi-RCTs	N/A	Mixed (adults and children)	Authors' text		Anorexia nervosa	THC 7.5mg - 30mg (max)	diazepam (3 - 15 mg)				weight gain	Reported study-by-study without synthesizing results	The anti-anxiety efficacy of cannabinoids was assessed in 5 studies) involving a total of 38 patients and 44 healthy volunteers; two early studies indicated equivocal anti-anxiety effects of nabilone. However, this was not observed in another study involving 8 symptomatic volunteers. Final two studies showed significant decrease in anxiety with cannabinoids.	While there are trials that suggest potential benefit of cannabinoids for anorexia nervosa, anxiety, PTSD, psychotic symptoms agitation in Alzheimer’s disease and dementia, Huntington’s disease, and Tourette syndrome, and dyskinesia in Parkinson’s disease, insufficient conclusion could be made due to the low quality of evidence as indexed by the Cochrane risk of bias, and underpowered samples. An…
40																																						Authors' text		Anorexia nervosa	dronabinol 5mg	placebo				weight gain	Reported study-by-study without synthesizing results
40																																						Authors' text		Anxiety	Nabilone 1mg	Placebo				anti-anxiety efficacy	Reported study-by-study without synthesizing results
40																																						Authors' text		Anxiety	cannabidiol 600mg	placebo				anxiety reduction	Reported study-by-study without synthesizing results
40																																						Authors' text		Anxiety	cannabidiol 400mg	NR				subjective anxiety	Reported study-by-study without synthesizing results
40																																						Authors' text		PTSD	nabilone 0.5 - 3.0mg	placebo				nightmares	Reported study-by-study without synthesizing results	1 study
40																																						Authors' text		PTSD	nabilone 0.5 - 3.0mg	placebo				Clinical Global Impression of Cahnge (CGI-C)	Reported study-by-study without synthesizing results
40																																						Authors' text		Psychotic symptoms	cannabidiol 200mg - 800mg	amisulpride				Clinical improvements	Reported study-by-study without synthesizing results	1 study
40																																						Authors' text		Alzheimer's disease	dronabinol 2.5mg	NR				disturbed behaviour	Reported study-by-study without synthesizing results
40																																						Authors' text		Dementia	dronabinol 2.5mg	NR				Nighttime agitation	Reported study-by-study without synthesizing results	Three trials on dementia (78 participants), rated as having an unclear risk of bias, showed equivocal results [for dementia.]
40																																						Authors' text		Dementia	dronabinol 2.5mg	NR				strengthened circadian rhythms	Reported study-by-study without synthesizing results
40																																						Authors' text		Dementia	THC (0.75 - 1.5mg)	NR				neuropsychiatric symptoms	Reported study-by-study without synthesizing results
40																																						Authors' text		Amyotrophic lateral sclerosis	THC 10mg	placebo				cramp intensity	Reported study-by-study without synthesizing results	1 study
40																																						Authors' text		Amyotrophic lateral sclerosis	THC 10mg	placebo				number of cramps	Reported study-by-study without synthesizing results
40																																						Authors' text		Dystonia	nabilone (0.03 mg/kg)	placebo				Unclear what the outcome is (Burke-Fahn-Marsden dystonia scale)	Reported study-by-study without synthesizing results	Two trials (24 participants) indicated lack of evidence on the use of cannabinoid for dystonia
40																																						Authors' text		Cervical Dystonia	dronabinol 15mg	placebo				Unclear what the outcome is (Toronto Western Hospital Spasmodic Torticollis Rating scale)	Reported study-by-study without synthesizing results
40																																						Authors' text		Huntington's Disease	cannabidiol 10mg/kg	placebo				chorea severity	Reported study-by-study without synthesizing results	The efficacy of cannabinoids for Huntington’s disease was assessed in 3 trials (84 participants) - mixed results
40																																						Authors' text		Huntington's Disease	nabilone 1 or 2mg	NR				total motor and chorea score	Reported study-by-study without synthesizing results
40																																						Authors' text		Huntington's Disease	Nabiximols (up to 12 sprays/day)	NR				treatment effect	Reported study-by-study without synthesizing results
40																																						Authors' text		Parkinson's disease	nabilone 0.03 mg/kg	NR				dyskinesia	Reported study-by-study without synthesizing results	Three studies (49 participants) examined the use of cannabinoids for Parkinson’s disease - mixed results
40																																						Authors' text		Parkinson's disease	THC up to 0.25 mg/kg	placebo				dyskinesia (UPDRS scale)	Reported study-by-study without synthesizing results
40																																						Authors' text		Parkinson's disease	THC up to 0.25 mg/kg	placebo				motor symptoms	Reported study-by-study without synthesizing results
40																																						Authors' text		Parkinson's disease	THC up to 0.25 mg/kg	placebo				QOL	Reported study-by-study without synthesizing results
40																																						Authors' text		Parkinson's disease	cannabidiol (75 or 300 mg/day)	placebo				dyskinesia (UPDRS scale)	Reported study-by-study without synthesizing results
40																																						Authors' text		Parkinson's disease	cannabidiol 300mg/day	placebo				PDQ-39 (activities of daily living and stigma subscale)	Reported study-by-study without synthesizing results
40																																						Authors' text		Tourette syndrome	THC-5 10mg	placebo				Tics	Reported study-by-study without synthesizing results	Only two controlled trials (36 participants) evaluated the efficacy of cannabinoid for Tourette syndrome. Both showed improvement in reducing tics; one showed improvement in OCD behaviours
40																																						Authors' text		Tourette syndrome	THC-5 10mg	placebo				OCD behaviour	Reported study-by-study without synthesizing results
40																																						Authors' text		Tourette syndrome	THC up to 10mg/day	placebo				Tics	Reported study-by-study without synthesizing results
60	Published SR	Pain Physician	Aviram, J	2017	Israel	N/A	No funding	"there is a need to conduct a new, conclusive review that will present all the specific information of the compatible trials, as well as to conduct meta-analyses, which will incorporate all of the comparable RCTs in order to update the knowledge of clinicians and researchers, regarding the efficacy and the entire range of expected adverse events (AEs) of CBMs for pain treatment."	Soley focused on medical cannabis	Medline/Pubmed and Google Scholar	2	1975 - July 2015	The selected studies were double-blind, RCTs (most placebo-controlled, some included active drugs and placebo comparisons, and few included only active drugs comparisons) with a crossover or parallel design. In the intervention group, patients were to have received any type of cannabis preparation, by any route of administration. Synthetic derivates of THC, such as dronabinol, nabilone, sativex/n…	Not reported	Not specifically defined: cannabis-based medicines (CBMs), and authors state that " From a clinical standpoint, most physicians grasp CBMs as a palliative treatment or as a part of a multi-model pain treatment. On the other hand, the use of CBMs is poorly taught in the training of physicians due to the scarcity of quality randomized controlled trials (RCTs) in this field"	Not defined	Various types	derivates of THC, such as dronabinol, nabilone, sativex/nabiximol, cannabidiol, CT-3, ajulemic acid, synthetic nitrogen analog of tetrahydrocannabinol (NIB), cannabinoid cigarettes/vaporizer, cannabinoid extract, fatty acid amide hydrolase-1 (FAAH1) inhibitor (PF-04457845), levonantradol, and benzopyranoperidine (BPP)	either placebo, whether “identical” or not, or an “active” (weak opioids or naproxen) treatment	Symptoms, signs and abnormal clinical and laboratory findings, not elsewhere classified			Chronic pain or postoperative pain	NR	Not reported	Not reported	N/A	pain	Yes	Yes	Jadad scale	43	2437	NR	RCTs or quasi-RCTs	N/A	Adults (18+)	Meta-analysis	24 crossover studies (and 41 different interventions); both fixed and random effect models yielded similar results	Various conditions related to pain	Cannabinoids (all)	placebo	Pain	chronic pain and postoperative pain	Favours intervention
60																																						Meta-analysis	acute pain studies excluded	Various conditions related to pain	Cannabinoids (all)	placebo	Pain	chronic pain	Favours intervention
60																																						Meta-analysis	Active control studies excluded	Various conditions related to pain	Cannabinoids (all)	placebo	Other (specify in AZ)	Unclear; assume effect on pain	Favours intervention
60																																						Meta-analysis		Various conditions related to pain	Smoked/inhaled cannabinoids	placebo	Other (specify in AZ)	Unclear; assume effect on pain	Favours intervention
60																																						Meta-analysis	Active control studies excluded	Various conditions related to pain	Cannabinoids (all)	placebo	Neuropathic Pain	N/A	Favours intervention
60																																						Meta-analysis		Cancer	Cannabinoids (all)	placebo	Pain	Cancer pain	Favours intervention
60																																						Meta-analysis		Various conditions related to pain	Cannabinoids (all)	placebo	Pain	Chronic noncancer pain	Favours intervention
60																																						Meta-analysis		Postoperative	Cannabinoids (all)	placebo	Other (specify in AZ)	Acute postoperative pain	Favours control			"although 19 of the 43 studies were not included in the meta-analyses, they showed moderate quality methodology, indicating that CBMs induced pain reduction, either by N% of patients or by demonstrating significant pain reduction visually by a graph"	The current study’s results suggest that medicinal use of cannabinoids should be further investigated for chronic pain treatment, either as a single treatment, or as a combination treatment with the more conventional treatments, such as opioids and anti-neuropathic pain (NP) medications, as we are not aware of the possible AEs of combination treatments with CBMs. In comparison to other indication…
60																																						Authors' text	19/43 review studies narratively synthesized	Cancer	Nabiximols	placebo	Pain	Chronic noncancer pain	Reported study-by-study without synthesizing results			7 studies in this review reported significant (30-50%) pain reduction in a substantial part of their patients
60																																						Authors' text	19/43 review studies narratively synthesized	Condition not specified	oromucosal spray of THC or cannabidiol	placebo	Neuropathic Pain	N/A	Reported study-by-study without synthesizing results
60																																						Authors' text	19/43 review studies narratively synthesized	Condition not specified	ajulemic acid	placebo	Neuropathic Pain	N/A	Reported study-by-study without synthesizing results
60																																						Authors' text	19/43 review studies narratively synthesized	HIV	cannabinoids (inhaled)	placebo	Neuropathic Pain	N/A	Reported study-by-study without synthesizing results
60																																						Authors' text	19/43 review studies narratively synthesized	Condition not specified	cannabis extract	placebo	Pain	Clinical pain	Reported study-by-study without synthesizing results
60																																						Authors' text	19/43 review studies narratively synthesized	Condition not specified	THC (inhaled)	placebo	Neuropathic Pain	N/A	Reported study-by-study without synthesizing results
60																																						Authors' text	19/43 review studies narratively synthesized	Condition not specified	Sativex	placebo	Peripheral Neuropathic Pain	N/A	Reported study-by-study without synthesizing results
61	Published SR	Complementary Therapies in Medicine	da Rovare, VP	2017	Brazil	N/A	Not reported	The aim of this systematic review and metanalysis is to look into more detail on the use of cannabinoids for these particular conditions [multiple sclerosis and spinal cord injury with spasticity]	Soley focused on medical cannabis	MEDLINE, EMBASE, CENTRAL, LILACS	4	To March 20, 2017 (start date not specified)	• Patients: Spasticity due to multiple sclerosis or paraplegia affecting upper and/or lower limbs. Confirmed MS diagnosis with validated criteria or how defined by authors and regardless of MS subtype. • Intervention: cannabis plant, with THC and/or CBD, regardless of type of extract • Control: usual care, placebo, or no intervention • Primary outcomes: spasticity, spasm frequency, spasm severity…	Not reported	Any type of cannabis extract or cannabinoid-based medication	Introduction	Various types	Cannabis plant, with any compounds such as delta-9-tetrahydrocannabinol (THC) and/or cannabidiol (CBD), regardless the type of extracts (e.g. oil, hash, tinctures).	Usual care, placebo or no intervention	Diseases of the nervous system			Multiple sclerosis or paraplegia	Not specified	Not reported	Not reported	No	Spasticity	Yes	No	Modified version of Cochrane risk of bias tool	16 studies (24 publications)	2597	11-630	RCTs or quasi-RCTs		Adults (18+)	Meta-analysis	7 studies	MS and paraplegia	Cannabinoid	placebo	N/A			Spasticity	No statistical difference between groups		(1) Based on the GRADE approach, meta-analysis of moderate certainty evidence from 16 eligible placebo-controlled trials including 2597 patients suggested a non-statistically significant improvement in spasm frequency and severity, cognitive function, daily activities, and motricity with cannabinoid use. (2) Low certainty evidence showed a possible reduction in spasticity, although the associatio…
61																																						Meta-analysis	6 studies	MS and paraplegia	Cannabinoid	placebo	N/A			Spasm frequency	No statistical difference between groups
61																																						Meta-analysis	3 studies	MS and paraplegia	Cannabinoid	placebo	N/A			Spasm severity	No statistical difference between groups
61																																						Meta-analysis	3 studies	MS and paraplegia	Cannabinoid	placebo	Pain		No statistical difference between groups
61																																						Meta-analysis	2 studies	MS and paraplegia	Cannabinoid	placebo	N/A			Cognitive function	No statistical difference between groups
61																																						Meta-analysis	5 studies	MS and paraplegia	Cannabinoid	placebo	N/A			Daily activities	No statistical difference between groups
61																																						Meta-analysis	4 studies	MS and paraplegia	Cannabinoid	placebo	N/A			Motricity	No statistical difference between groups
61																																						other	1 study; effect estimate and CIE reported	MS and paraplegia	Cannabinoid	placebo	N/A			Bladder function	No statistical difference between groups
61																																						Meta-analysis	14 studies	MS and paraplegia	Cannabinoid	placebo	N/A			Dizziness (adverse event)	Favours control
61																																						Meta-analysis	11 studies	MS and paraplegia	Cannabinoid	placebo	N/A			Somnolence (adverse event)	Favours control
61																																						Meta-analysis	12 studies	MS and paraplegia	Cannabinoid	placebo	N/A			Headache (adverse event)	No statistical difference between groups
61																																						Meta-analysis	11 studies	MS and paraplegia	Cannabinoid	placebo	N/A			Nausea (adverse event)	Favours control
61																																						Meta-analysis	10 studies	MS and paraplegia	Cannabinoid	placebo	N/A			Dry mouth (adverse event)	Favours control
88	Published SR	Aliment Pharmacol Ther	Norton, C	2017	UK	N/A	Not reported	To provide a comprehensive review of non-disease modifying interventions for abdominal pain in patients with IBD	Mixed pharmaceutical and CAM interventions (cannabis included)	MEDLINE, EMBASE, PsycINFO, CIHAHL, Cochrane Library	5	Inception - February 2016	Studies were excluded if their primary aim was to modify disease activity or if pain was reported only within a composite score (such as an IBS composite score) rather than reported separately. Our initial criteria were to include only studies where IBD participants were in remission. However, this yielded a very small and partial review, and therefore studies which included patients with active …	Protocol completed, and link and/or registration # reported	Not defined	Not defined	Plant-based materials (e.g. marijuana, hashish)	Unclear: use the terms "marijuana" and "cannabis," so assuming it was plant-based	NR	Diseases of the digestive system			Inflammatory bowel disease (IBD)	NR	Not reported	Not reported	N/A	abdominal pain management	No	No	Critical Appraisal Skills Programme [CASP] assessment tools	3	568	NR	Various (specify in column Ak)	Cross-sectional and open label	Not reported												Despite IBD patients’ frequent reports of chronic abdominal pain, only a few interventions have been tested in this population to alleviate the symptom or to improve pain perception and management. The current limited evidence suggests that learning to manage pain through relaxation or cognitive techniques may be the most promising approaches, possibly with some individualised dietary changes. Ph…
107	Published SR	Clinical Psychology Review	Walsh, Z	2017	Canada	N/A	Government	To systematically review studies of CTP and meta-review studies of NMC (non-medical use of cannabis.) elucidating the influence of CTP (cannabis for therapeutic purposes) use on adult psychopathology and psychological assessment.	Includes both medical cannabis and other cannabis use	Psycinfo, Medline	2	1960 - Sept 2015	"studies were included if they addressed the association of CTP use with these outcomes (i.e. anxiety disorder, posttraumatic stress disorder, social anxiety disorder, substance dependence, substance abuse, substance use disorder, tobacco, cocaine, alcohol, opiates, heroin, amphetamine, depression, bipolar, mania, mood disorder, psychosis, schizophrenia, neuropsychology, neurocognitive, IQ, intel…	Not reported	"Although the majority of CTP programs specifically focus on the use of cannabis for symptoms associated with physical health disorders (e.g. arthritis, cancer, chronic pain), a substantial portion of CTP use aims to address mental health concerns, and CTP users evince substantial levels of psychiatric comorbidity. As such, mental health practitioners are increasingly likely to encounter CTP use …	Introduction	Not reported	Included all types of cannabis I think, although this was not clear and they did not report the type in the included studies	NR	Mental and behavioural disorders			Mental health: Substance abuse, anxiety, depression, psychosis, cognitive functioning, harmful behaviour	NR	Adults (18+)	Not reported	N/A	Treatment: medical and non-medical therapeutic purposes	No	No	Adapted Newcastle-Ottawa scale (do not report how they assessed quality of one RCT)	31	23850	NR	Various (specify in column Ak)	RCT, cohort, open-label trial	Adults (18+)	Authors' text	Only one RCT included; author's provide little data	Chronic neuropathic pain	Highest dose of THC	Cannabis with no THC				Improvement in anxiety and depression	Reported study-by-study without synthesizing results	Authors lump the one RCT with other cross-sectional data: "we identified 9 cross-sectional studies of CTP and depressed mood, 7 of which noted mood improvement among the alutary effects of CTP. These effects appear to be consistent across condition and were evidence in studies that examined specific patient groups such as pain"	In sum, the implications of CTP for mental health care appear to vary across conditions with potential for both benefits and harms. In this regard cannabis is similar to other psychoactive medicines. Health care providers should work to maximize positive outcomes by pursuing strategies to increase medication adherence, such as psychoeducation, ongoing assessment of motivations and barriers to adh…
145	Published SR	Journal of Pain Research	Snedecor, S	2013	USA	N/A	Industry	the primary objective of the current study was to conduct a systematic review of all available randomized clinical trials evaluating currently used pharmacologic therapies for the treatment of NeP (neuropathic pain) in patients with SCI (spinal cord injury) with the goal of understanding their relative efficacy and safety.	Various pharmaceutical interventions (cannabis being one)	PubMed/Medline, Cochrane Database of Systematic Reviews, Cochrane Central Register of Controlled Trials, Embase, and the Database of Abstracts of Reviews of Effects	5	Through Dec 2011	Study inclusion criteria consisted of randomized, controlled trials in SCI of adults aged ≥ 18 years. Exclusion criteria were: fewer than 4 weeks in duration, drugs in combination with nonpharmacologic modalities, drugs administered intravenously, drugs no longer used to treat neuropathic pain, or over-the-counter agents and food supplements. Studies including patients with mixed NeP were exclude…	Not reported	Not defined	Not defined	Synthetic cannabinoid (e.g. nabilone, dronabinol)	Dronabinol	NR	Injury, poisoning and certain other consequences of external causes			Neuropathic pain associated with spinal cord injury	NR	Adults (18+)	Mixed	N/A	neuropathic pain	Yes	Yes	Jadad Scale	1	7	N/A	RCTs or quasi-RCTs	RCTs	Adults (18+)	Direction of effect	Narrative	Spinal cord injury	Dronabinol (20mg)	placebo	Neuropathic Pain		Favours control			Treatment effects for the 11-point NRS were calculated as the difference between active comparator and placebo for the change from baseline to end point on the pain scale. "Treatment effects worse than placebo were reported for dronabinol (+2)…"	this systematic review compiles the best available evidence for the treatment of NeP associated with SCI and demonstrates a substantial need for comparative studies of pharmacologic therapies for this chronic pain condition. To make proper efficacy comparisons among treatments, one must consider sample size, study design (parallel or crossover), statistical analysis methods, and efficacy outcomes…
169	Published SR	Drug and Alcohol Dependence	Goldenberg, M	2017	USA	N/A	No funding	To understand the impact of cannabis and cannabinoids used for medical conditions on the individuals who utilize them, we conducted a systematic review and meta-analysis of studies evaluating the relationship between cannabis and cannabinoids used for medical conditions and HRQoL. Specifically, we sought to understand whether different forms of cannabis and cannabinoids differentially impact HRQo…	Soley focused on medical cannabis	Pubmed, CINAHL, PsycInfo, Cochrane Library of Controlled Trials and Cochrane Library of Systematic Reviews	5	"inclusion through 2015"	(1) articles in English or English translation; (2) publication in a peer-reviewed journal; (3) studies that focused on cannabis or cannabinoids; (4) studies that measured HRQoL using a generic or disease-specific multi-item questionnaire; and (5) studies that reported an outcome related to either global or domain-specific HRQoL. We excluded articles if they were poster/presentation synopses, did…	Not reported	Not specifically defined; focus of review is on use of cannabis and cannabinoids for medical conditions	Not defined	Various types	Cannabis and cannabinoids	NR	Diseases of the nervous system	Neoplasms	Symptoms, signs and abnormal clinical and laboratory findings, not elsewhere classified	Multiple conditions/illnesses: fibromyalgia, HIV, IBD, pain, MS, headache, cramps, cancer-related anorexia, traumatic brain injury	NR	Not reported	Not reported	N/A	Multiple	Yes	Yes	criteria adapted from Corchrane Database of Systematic Reviews	20	NR	NR	Various (specify in column Ak)	RCTs, observational cohorts, cross-sectional	Not reported	Meta-analysis		Various	Various (cannabis, cannabinoids and synthetics)	Various (non-users, placebo, ibuprofen)				HRQoL	No statistical difference between groups	9 studies included (8 studies were not included because they did not report any measure of variability)	Our systematic review and meta-analysis of studies evaluating cannabis or cannabinoids for medical conditions does not reveal a main effect on HRQoL. However, there are specific disease states, such as pain, that separate from the overall trend. Given the common perception that cannabis and cannabinoids are pleasurable, and the known reinforcing effects of cannabis, it is of utmost importance to …
171	Published SR	Anesthesia Analgesia	Meng, H	2017	Canada	N/A	Non-profit/academic	The primary objective of this SR-MA was to determine the analgesic efficacy of selective cannabinoids compared with conventional management or placebo for chronic NP after at least 2 weeks after commencement of treatment.	Soley focused on medical cannabis	EMBASE, MEDLINE, MEDLINE In-Process and Other Non-Indexed Citations, Cochrane Database of Systematic Reviews, PROSPERO, Cochrane Central Register of Controlled Trials, Google Scholar	7	Through March 11, 2016	RCTs with 2 week follow-up; diagnosis of NP; human subjects 18 years or older, with NP for at least 3 months, with intensity of pain moderate or severe; 3 prescription selective cannabinoids (dronabinol, nabilone and nabiximols) with comparator as placebo or standard management. "Among open-label extended trials following an experimental RCT study period, only the RCT study period results were ex…	Protocol completed, and link and/or registration # reported	Not specifically defined: " In the last decade, the use of cannabis and selective cannabinoids (synthetic cannabinoids containing only tetrahydrocannabinol [THC] and cannabis-based medicinal extracts containing a combination of THC and cannabidiol [CBD]) has gained popularity for the treatment of NP."	Not defined	Various types	Plant-derived cannabinoids and synthetic cannabinoids	placebo or standard management	Symptoms, signs and abnormal clinical and laboratory findings, not elsewhere classified			Chronic neuropathic pain	NR	Adults (18+)	Mixed	N/A	pain	Yes	Yes	Cochrane RoB tool (GRADE also used)	11	1219	15-339	RCTs or quasi-RCTs	RCTs	Adults (18+)	Authors' text	narrative synthesis: 6/11 studies	Neuropathic pain	Cannabinoids	placebo	Neuropathic Pain		Favours intervention			6 demonstrated analgesic superiority of selective cannabinoids compared to placebo based on Change in NRS pain scores, or proportion of patients achieving more than 30% reduction in intensity of pain as compared to baseline	There was moderate quality evidence to suggest nabiximols is effective in reducing NP. There was no significant difference on the analgesic impact of selective cannabinoids on different locations of NP. Selective cannabinoids may have a role as coanalgesic therapy for refractory NP. Challenges to overcome in subsequent studies include ensuring that trials are blinded (patients, clinical team, dat…
171																																						Meta-analysis	10 studies	Neuropathic pain	Cannabinoids	placebo or dihydrocodeine (1 study)	Neuropathic Pain		Favours intervention			Reduction in pain scores
171																																						Authors' text	1 study	Central NP	Dronabinol	placebo	Central Neuropathic Pain		Reported study-by-study without synthesizing results			Outcome was labeled "analgesic potential" which I'm assuming means lower pain scores?
171																																						Meta-analysis	3 studies	Neuropathic pain	Nabilone	placebo or dihydrocodeine (1 study)	Neuropathic Pain		No statistical difference between groups			Reduction in pain scores
171																																						Meta-analysis	6 studies	Neuropathic pain	Nabiximols	placebo	Neuropathic Pain		Favours intervention			Reduction in pain scores
171																																						Meta-analysis	5 studies	Central NP	Cannabinoids	placebo	Central Neuropathic Pain		Favours intervention			"analgesic benefit"
171																																						Meta-analysis	4 studies (1 study not estimable; so 3 in total)	Peripheral NP	Cannabinoids	placebo	Peripheral Neuropathic Pain		No statistical difference between groups			"analgesic benefit"
171																																						Authors' text		Mixed central and peripheral NP	Nabiximols	placebo	Other (specify in AZ)	Mixed Central and peripheral NP	Reported study-by-study without synthesizing results
171																																						Authors' text		Mixed central and peripheral NP	Nabilone	Dihydrocodeine	Other (specify in AZ)	Mixed Central and peripheral NP	Reported study-by-study without synthesizing results
171																																						Authors' text	narrative synthesis: 5/8 studies	Neuropathic pain	Cannabinoids	placebo	Neuropathic Pain			QoL	Favours intervention	5 of 8 studies that assessed QoL demonstrated an improvement in this parameter with selective cannabinoids
171																																						Authors' text	narrative synthesis: 3 studies	Neuropathic pain	Cannabinoids	placebo	Neuropathic Pain			QoL (physical function)	Favours control	Only 1 of 3 studies reported improvement in this domain
171																																						Authors' text	narrative synthesis: 7 studies	Neuropathic pain	Cannabinoids	placebo	Neuropathic Pain			QoL (quality of sleep	Favours intervention	6 of 7 studies that assessed quality of sleep found an improvement in this parameter
171																																						Authors' text	narrative synthesis: 3 studies	Neuropathic pain	Cannabinoids	placebo	Neuropathic Pain			Anxiety	Favours control	Only 1 or 3 studies that measured anxiety reported an improvement
171																																						Authors' text	narrative synthesis: 6 studies	Neuropathic pain	Cannabinoids	placebo	Neuropathic Pain			Satisfaction of participants	Favours intervention	5 of 6 studies reported positive results for this outcome
171																																						Authors' text	narrative synthesis: 3 studies	Neuropathic pain	Cannabinoids	placebo	Neuropathic Pain			QST profile (rise in threshholds)	Favours intervention	3 of the 4 studies demonstrated improvement in QST profile (rise in threshholds)
171																																						Meta-analysis	9 trials	Neuropathic pain	Nabiximols or THC	placebo	Neuropathic Pain	>/= 30% improvement in pain	Favours intervention			11 studies included, and 9 were meta-analyzed. Of all 11 studies, they did generally not find clinically significant between-group differences on continuous pain scales, but a higher proportion of intervention patients had clinically significant pain relief up to several months later
171																																						Authors' text	Narrative synthesis	Cancer pain	Nabiximols or THC	NR	Pain	cancer pain	No statistical difference between groups			3 trials
192	Published SR	Annals of Internal Medicine	Nugent, SM	2017	USA	N/A	Government	to assess the efficacy of cannabis for treating chronic pain and to provide a broad overview of the short- and long-term physical and mentaL health effects of cannabis use in chronic pain and general patient populations	Soley focused on medical cannabis	MEDLINE, Embase, PubMed, PsycINFO, Evidence-Based Medicine Reviews (including Cochrane Database of Systematic Reviews, Database of Abstracts of Reviews of Effectiveness, Health TechnologyAssessments, and Cochrane Central Register of Controlled Trials),	9	database inception through February 2016- Updated search in March 2017	1. English-language studies assessing the effect on nonpregnant adults of plant-based cannabis preparations or whole-plant extracts, such as nabiximols, a nonsynthetic pharmaceutical product with a standard composition and dose (oromucosal spray delivering tetrahydrocannabinol [THC], 2.7 mg, and cannabidiol, 2.5 mg). 2. Excluded synthesized, pharmaceutically prepared cannabinoids, such as dronabi…	Protocol completed, and link and/or registration # reported	Not specifically defined, but allude to legally prescribed cannabis in this statement: "We broadly defined plant- based cannabis preparations to include any preparation of the cannabis plant itself (for example, cannabis cigarettes and oils) or cannabis plant extracts to capture the variety of products available in U.S. dispensaries."	Methods	Various types	plant-based cannabis preparations or whole-plant extracts, such as nabiximols, a nonsynthetic pharmaceutical product with a standard composition and dose (oromucosal spray delivering tetrahydrocannabinol [THC], 2.7 mg, and cannabidiol, 2.5 mg).	NR	Symptoms, signs and abnormal clinical and laboratory findings, not elsewhere classified			Chronic pain in a various conditions	Maijuana dispensaries	Adults (18+)	Mixed	N/A	pain	No	No	Cochrane RoB	75	NR	NR	Various (specify in column Ak)	RCTs, cohort and systematic reviews	Adults (18+)	Authors' text	Narrative synthesis	Multiple sclerosis	Nabiximols	NR	Central Neuropathic Pain	N/A	No statistical difference between groups			Nine trials examined the effects of cannabis-based preparations on pain among patients with multiple sclerosis (MS); Overall, we found insufficient evidence to characterize the effects of cannabis on pain in patients with MS	In our systematic review, we found limited evidence on the potential benefits and harms of cannabis use in chronic pain populations...We found low-strength evidence that cannabis preparations with precisely defined THC– cannabidiol content (most in a 1:1 to 2:1 ratio) may alleviate neuropathic pain but insufficient evidence in populations with other types of pain. Most studies are small, many hav…
192																																						Meta-analysis	9 trials	Neuropathic pain	Nabiximols or THC	placebo	Neuropathic Pain	>/= 30% improvement in pain	Favours intervention			11 studies included, and 9 were meta-analyzed. Of all 11 studies, they did generally not find clinically significant between-group differences on continuous pain scales, but a higher proportion of intervention patients had clinically significant pain relief up to several months later
192																																						Authors' text	Narrative synthesis	Cancer pain	Nabiximols or THC	NR	Pain	cancer pain	No statistical difference between groups			3 trials
193	Published SR	Annals of Internal Medicine	O'Neil, M	2017	USA	N/A	Government	The objectives of this systematic review were to assess the benefits and harms of plant-based cannabis use in patients with PTSD and to identify ongoing studies in this area.	Soley focused on medical cannabis	MEDLINE, EMBASE, PubMed, PsycINFO, the Published International Literature on Traumatic Stress database, Evidence-Based Medicine Reviews (Cochrane Database of Systematic Reviews, Database of Abstracts of Reviews of Effectiveness, Health Technology Assessment Database, and Cochrane Central Register of Controlled Trials)	9	Inception to March 2017	We included studies (systematic reviews, controlled clinical trials, and observational studies using control groups) of nonpregnant adults with PTSD that assessed the effects of plant-based cannabis preparations or whole-plant extracts, such as nabiximols, a nonsynthetic pharmaceutical product with a standard composition and dosage.	Protocol completed, and link and/or registration # reported	Not specifically defined, but allude to legally prescribed cannabis via dispensaries: "We broadly defined plant-based cannabis preparations to include any preparation of the plant or its extracts to capture the wide variety of products available in U.S. dispensaries."	Methods	Various types	Plant-based cannabis preparations or whole-plant extracts such as nabiximols	Different dose or different duration of dose (including no use)	Mental and behavioural disorders			PTSD	dispensaries	Adults (18+)	Mixed	N/A	PTSD symptoms and severity	Yes	No	Adapted Newcastle-Ottawa scale and AHRQ methods guide for assessing RoB	5	NR	NR	Various (specify in column Ak)	systematic reviews and observational	Not reported												Overall, we found insufficient evidence regarding the benefits and harms of plant-based cannabis preparations for patients with PTSD. The body of literature currently available is limited by small sample sizes, lack of adjustment for important potential confounders, cross-sectional study designs, and a paucity of studies with non– cannabis-using control groups. Findings from RCTs are needed to he…
																																						Authors' text	1 study	multiple sclerosis (with NLUTD)	THC, CBD or THC:CBD	Placebo	N/A	N/A		Decrease in number of nocturia episodes	Reported study-by-study without synthesizing results
																																						Authors' text	1 study	multiple sclerosis (with NLUTD)	THC, CBD or THC:CBD	Placebo	N/A	N/A		voids per 24h	Reported study-by-study without synthesizing results
																																						Authors' text	2 studies	multiple sclerosis (with NLUTD)	THC, CBD or THC:CBD	Placebo	N/A	N/A		Urgency episodes/day	Reported study-by-study without synthesizing results
198	Published SR	BJU International	Youssef, NA	2017	Switzerland	N/A	Non-profit/academic	To review systematically all the available evidence on efficacy and safety of cannabinoids for treating neurogenic lower urinary tract dysfunction (NLUTD) in patients with multiple sclerosis (MS).	Includes both medical cannabis and other cannabis use	Cochrane Central Register of Controlled Trials, Embase, Medline and Scopus	4	1 January 1946 and 11 November 2016	We aimed to include all original studies that reported efficacy and/or safety data on cannabinoids for treating NLUTD in women and men with MS, including randomized controlled trials (RCTs), comparative non-RCTs, and single-arm cohort studies. Non-original articles, those including children only, and those not discriminating between patients with MS and other neurological/non-neurological disorde…	Protocol completed, and link and/or registration # reported	Not defined	Not defined	Plant-derived cannabinoids (e.g. THC, cannabidiol, THCV, nabiximols (e.g.Sativex))	Cannabinoids	NR	Diseases of the nervous system			Multiple sclerosis (with Neurogenic lower urinary tract dysfunction (NLUTD))	NR	Adults (18+)	Mixed	N/A	Neurogenic lower urinary tract disfunction	Yes	No	Cochrane RoB; for non-RCT, confounding was also explored	3	426	NR	Various (specify in column Ak)	RCTs, comparative non-RCTs and single arm cohorts	Adults (18+)	Meta-analysis	Combined RCT data with open-label study data by generating a norm-control group from the mean values of the two control groups of the RCTs	multiple sclerosis (with NLUTD)	THC, CBD or THC:CBD	Placebo	N/A	N/A		Decrease in incontinence episodes	Favours intervention		The currently available evidence implies that cannabinoids may be effective and safe for treating NLUTD in patients with MS; however, although we identified two RCTs, the reported outcomes, number of investigated patients and follow-up were very limited and the study heterogeneity was substantial; therefore, the present systematic review, although suggesting that treatment with cannabinoids is a …
198																																						Authors' text	1 study	multiple sclerosis (with NLUTD)	THC, CBD or THC:CBD	Placebo	N/A	N/A		Decrease in number of nocturia episodes	Reported study-by-study without synthesizing results
198																																						Authors' text	1 study	multiple sclerosis (with NLUTD)	THC, CBD or THC:CBD	Placebo	N/A	N/A		daytime voids	Reported study-by-study without synthesizing results
198																																						Authors' text	1 study	multiple sclerosis (with NLUTD)	THC, CBD or THC:CBD	Placebo	N/A	N/A		voids per 24h	Reported study-by-study without synthesizing results
198																																						Authors' text	2 studies	multiple sclerosis (with NLUTD)	THC, CBD or THC:CBD	Placebo	N/A	N/A		Urgency episodes/day	Reported study-by-study without synthesizing results
208	Published SR	Archives of Physical Medicine and Rehabilitation	Mehta, S	2016	Canada	N/A	Not reported	It was our objective to conduct a systematic review of published studies to examine the effectiveness of pharmacologic treatment for pain after SCI (spinal cord injury)	Various pharmaceutical interventions (cannabis being one)	PubMed/MEDLINE, CINAHL, Embase, and PsycINFO	4	2009 to September 2015	Studies were included for analysis if they met the following 4 a priori criteria: (1) written in the English language; (2) ≥50% of subjects had an SCI, unless results were stratified by population type; (3) participants included ≥3 subjects with an SCI; and (4) any intervention which involved pharmacologic treatment for the improvement of pain. Studies assessing concomitant therapies were include…	Protocol mentioned, but no link or registration # reported	Not defined	Not defined	Various types	Cannabinoid and synthetic (THC and dronabinol)	NR	Injury, poisoning and certain other consequences of external causes			spinal cord injury	NR	Not reported	Not reported	N/A	pain	No	Yes	Physiotherapy Evidence Database (PEDro) scoring system	2	42	NR	RCTs or quasi-RCTs		Not reported	Authors' text		Spinal cord injury	Dronabinol	Active placebo (diphenhydramine)	Neuropathic Pain		Reported study-by-study without synthesizing results			2 studies included; negative outcome for NP and mixed results for spastic pain	There is level 1 evidence that dronabinol does not reduce neuropathic pain post-SCI; there is conflicting evidence for the use of THC in reducing spastic pain in persons with SCI
211	Published Guideline with SR	Pain Practice	van den Beuken-van Everdingen, M	2017	Netherlands	N/A	Not reported	"In the Netherlands, we recently updated our guideline “Diagnostics and treatment of pain in patients with cancer.” As part of this, the literature on the effectiveness of adjuvant analgesics and analgesics in neuropathic pain in cancer pain patients was systematically reviewed."	Various pharmaceutical interventions (cannabis being one)	MEDLINE, EMBASE, Cochrane Trials	3	January 2005 to May 2014	study type: systematic reviews, RCTs, cohort- or case–control studies; language: English; patient population: patients with cancer pain (both nociceptive and neuropathic, including chemotherapy-induced pain); intervention: adjuvant analgesics (as listed above in the keywords); comparison: placebo, opioid, or another adjuvant analgesic; outcomes: pain intensity as measured by a pain scale, side ef…	Not reported	Not defined	Not defined	Plant-derived cannabinoids (e.g. THC, cannabidiol, THCV, nabiximols (e.g.Sativex))	Cannabinoids	placebo, opioid, or another adjuvant analgesic	Neoplasms			Cancer	NR	Not reported	Not reported	N/A	Cancer pain: nociceptive and neuropathic, including chemotherapy-induced pain	Yes	No	Based on AMSTAR and PRISMA checklists	3	NR (177 in the RCT)	NR	Various (specify in column Ak)	Systematic review, RCT, observational	Not reported	Authors' text	1 RCT included	Cancer	THC: CBD	placebo or THC alone	Other (specify in AZ)	cancer pain; not specifically defined in the RCT	Reported study-by-study without synthesizing results			Authors are only providing results for 1 RCT	The treatment of pain associated with cancer should be patient tailored. In particular in neuropathic pain, treatment remains a matter of trial and error and accurate monitoring. When choosing the most optimal therapy for the patient, one should take into account the nature and severity of the pain, the side effect profile, comedication, the risk for drug interactions, and patient preference.Reco…
223	Published SR	Schmerz	Fitzcharles, MA	2016	Germany	N/A	Not reported	In the absence of any consistent guideline recommendation for cannabinoid use in patients with chronic musculoskeletal pain, we have examined the literature for evidence of the efficacy, tolerability, and safety of cannabinoids in chronic spinal pain, fibromyalgia syndrome (FMS,) osteoarthritis (OA,) and rheumatoid arthritis (RA) pain.	Soley focused on medical cannabis	CENTRAL and MEDLINE	2	until April 30, 2015	randomized controlled trials with a study duration of at least 2 weeks and at least ten patients per treatment arm with herbal cannabis or pharmaceutical cannabinoid products in fibromyalgia syndrome (FMS), osteoarthritis (OA), chronic spinal pain, and rheumatoid arthritis (RA) pain.	Not reported	cannabinoids currently exist as pharmaceutical preparations or as a herbal product derived from the leaves and flowers of the plant Cannabis sativa...pharmaceutical cannabinoid preparations have been recommended by some pain specialists for treatment of chronic musculoskeletal pain, whereas there is growing public and legislative support for legalization of herbal cannabis for medicinal use, espe…	Introduction	Various types	Plant-based, extracts and synthetics	placebo or any active comparators	Diseases of the musculoskeletal system and connective tissue			chronic spinal pain, rheumatoid arthritis, osteoarthritis or fibromyalgia	NR	Mixed (adults and children)	Mixed	N/A	Pain	Yes	Yes	Cochrane RoB	4	159	NR	RCTs or quasi-RCTs	N/A	Adults (18+)	Authors' text	Narrative synthesis of 4 studies	fibromyalgia, chronic spinal pain and RA	THC (1 study) or Nabilone (3 studies)	placebo or amitriptyline (1 study)	Pain		Favours intervention			"All included studies reported at least one pain-related outcome indicating some improvement with cannabinoids, although the comparator study of nabilone with amitriptyline showed no difference between the two treatments for pain"	In these four short-term studies, cannabinoids provided some relief from pain in three and was equivalent to amitriptyline for effect on sleep in one study but without differing from amitriptyline for effect on pain. The low quantity and quality of data available on the efficacy, tolerability, and safety of cannabinoids in chronic pain refractory to conventional treatment associated with rheumati…
223																																						Direction of effect	calculatied SMDs by the means and SDs extracted from one study	fibromyalgia	Nabilone	placebo				Anxiety	No statistical difference between groups	They calculated SMDs from only one study, so I'm not sure we want this data. Original study showed significant results for nabilone.
223																																						Direction of effect	calculatied SMDs by the means and SDs extracted from one study	fibromyalgia	Nabilone	placebo				fatigue	No statistical difference between groups	They calculated SMDs from only one study, so I'm not sure we want this data
223																																						Direction of effect	calculatied SMDs by the means and SDs extracted from one study	fibromyalgia	Nabilone	placebo				depression	No statistical difference between groups	They calculated SMDs from only one study, so I'm not sure we want this data
224	Published SR	Journal of the American Association of Nurse Practitioners	Tateo, S	2017	USA	N/A	Not reported	The purpose of this review is to ascertain the current state of the science regarding the medical use of cannabinoids for cancer pain, including their therapeutic effects, side effects, and other implications of this treatment modality.	Soley focused on medical cannabis	BIOSIS, CINAHL, Cochrane Library, and PubMed (inception–present).	4	NR ("inception to present")	To be included in this review, studies had to be randomized control trials (RCTs) performed on humans, examining the effects of cannabis or cannabinoids on cancer pain. Studies in which cannabinoids were examined for their effects on noncancer pain were excluded. Surveys, review articles, case reports/series, letters, and nonplacebo control trials were excluded.	Not reported	Today, marijuana and cannabinoids, such as delta-9-tetrahyrdocannabinol (THC) and cannabidiol (CBD), are classified by the U.S. Drug Enforcement Administration as Schedule I controlled substances. Neither marijuana nor cannabinoids can be prescribed under federal law (Kramer, 2015). The U.S. Food and Drug Administration (FDA, 2006) has not approved cannabis for medical use, citing a lack of safet…	Introduction	Various types	Cannabis or cannabinoids	NR	Neoplasms			Cancer	NR	Not reported	Not reported	N/A	pain	No	No	Jadad scale	8	683	10-360	RCTs or quasi-RCTs	RCTs	Adults (18+)	Authors' text		Cancer	THC (oral)	placebo	Pain		Reported study-by-study without synthesizing results				The eight studies included in this review were of low or moderate quality. There is evidence that cannabinoids are effective adjuvants for cancer pain not completely relieved by opioid therapy, but there is a dearth of high-quality studies to support a stronger conclusion. Cannabinoids appear to be safe in low and medium doses, with no serious adverse effects noted in these dose ranges
224																																						Authors' text		Cancer	THC (oral)	codeine or placebo	Pain		Reported study-by-study without synthesizing results
224																																						Authors' text		Cancer	benzopyranoperidine (BPP)	placebo	Pain		Reported study-by-study without synthesizing results
224																																						Authors' text		Cancer	nitrogen analogue of THC (NIB)	codeine or placebo	Pain		Reported study-by-study without synthesizing results
224																																						Authors' text		Cancer	nitrogen analogue of THC (NIB)	secobarbital or placebo	Pain		Reported study-by-study without synthesizing results
224																																						Authors' text		Cancer	THC:CBD	placebo	Pain		Favours intervention	Sleep disruption	Reported study-by-study without synthesizing results	"Three of the eight studies examined nabiximols, all reporting a decrease in pain measures, although Lynch et al. (2014) did not reach significance."
224																																						Authors' text		Cancer	THC:CBD	placebo				QoL	Reported study-by-study without synthesizing results
224																																						Authors' text		Cancer	THC:CBD	placebo				Impression of global change	Reported study-by-study without synthesizing results
224																																						Authors' text		Cancer	THC:CBD	placebo				sensory function	Reported study-by-study without synthesizing results
224																																						Authors' text		Cancer	THC:CBD	THC (oral) or placebo	Pain		Reported study-by-study without synthesizing results
227	Published SR	Acta Anaesthesiologica Scandinavica	Stevens, AJ	2017	Australia	N/A	No funding	We conducted a systematic review of the use of cannabinoids to investigate their analgesic efficacy and observed adverse effects when used to manage acute pain. We hypothesized that cannabinoid medications would not demonstrate analgesic efficacy when used for the management of acute pain.	Soley focused on medical cannabis	MEDLINE, EMBASE and CENTRAL	3	inclusive to 20 August 2016	Studies included in the systematic review were limited to human clinical randomized controlled trials of any cannabinoid medications that reported analgesic efficacy outcomes in acute pain when compared to placebo or active non-cannabinoid comparators. All studies were included regardless of route of administration, dosage or type of cannabinoid. No exclusion was made on the basis of article lang…	Protocol completed, and link and/or registration # reported	"Cannabinoids consist of a heterogeneous group of chemicals, both naturally occurring and synthetic, that act via CB1 and CB2 receptors. Despite the historical belief that they are effective in the management of pain, evidence from randomized controlled trials, along with other non-randomized clinical studies, pre-clinical and basic scientific studies, is conflicting regarding the efficacy of can…	Introduction	Various types	"Cannabinoid medications"	placebo or active non-cannabinoid comparators	Symptoms, signs and abnormal clinical and laboratory findings, not elsewhere classified			Acute pain	NR	Mixed (adults and children)	Mixed	N/A	pain	Yes	No	Cochrane RoB and GRADE	7	611	NR	RCTs or quasi-RCTs	N/A	Not reported	Authors' text	Narrative synthesis; 5/7 studies	Acute pain	Cannabinoids	placebo	Other (specify in AZ)	Acute pain	No statistical difference between groups			In five studies the analgesic efficacy of cannabinoids was found to be equivalent to that provided by placebo.	The results of this systematic review of seven studies have failed to demonstrate an overall benefit of the use of cannabinoids in the management of acute pain. Of the seven randomized controlled trials included in this systematic review, five demonstrated equivalent analgesia of cannabinoids to that of placebo, one demonstrated analgesia of cannabinoids that was inferior to that of placebo, and …
249	Published SR	Cochrane Database of Systematic Reviews	Walitt, B.	2016	Germany	USA	No funding	To assess the efficacy, tolerability and safety of cannabinoids for fibromyalgia symptoms in adults.	Soley focused on medical cannabis	Cochrane Central Register of Controlled Trials (CENTRAL), MEDLINE, EMBASE	3	to 26 April 2016 for MEDLINE and EMBASE / Issue 3 of 12, 2016 for CENTRAL	We included studies if they were randomised, double-blind con- trolled trials (RCTs) of at least four weeks’ duration. We included studies with a parallel, cross-over and enriched enrolment ran- domised withdrawal (EERW) design. We required full journal publication, with the exception of online clinical trial result summaries of oth- erwise unpublished clinical trials, and abstracts with sufficie…	Protocol mentioned, but no link or registration # reported	Cannabinoids may be administered therapeutically as a pharmaceutic product that is either synthetic or derived from the plant base, or by use of the herbal product that is not pharmaceutically manufactured.	Introduction	Various types	Cannabinoids (either phytocannabinoids such as herbal cannabis (hashish, marihuana), plant-based cannabinoids (nabiximole) or pharmacological (synthetic) cannabinoids (e.g. cannabidiol, dron- abinol, levonantradol, nabilone))	placebo or any active comparator	Diseases of the musculoskeletal system and connective tissue			Fibromyalgia	clinical use	Adults (18+)	Not reported	N/A	Treatment of fibromyalgia	Yes	Yes	using the criteria outlined in the Cochrane Handbook for Systematic Reviews of Interventions (Higgins 2011), and adapted from those used by the Cochrane Pregnancy and Childbirth Group	2	72	NR	RCTs or quasi-RCTs	RCTs	Adults (18+)	Authors' text	responder analysis - 1 study	Fibromyalgia	Nabilone	Placebo	Pain		Reported study-by-study without synthesizing results	anxiety	Reported study-by-study without synthesizing results	no significant difference	Clinical trial evidence on the use of cannabis products in fi- bromyalgia was limited to two small studies with short-term du- ration. No convincing, unbiased evidence suggests that nabilone is of value in treating people with fibromyalgia. The tolerability of nabilone was low in people with fibromyalgia. Adverse events (particularly somnolence, dizziness, vertigo) may limit its clini- cal useful…
249																																														HRQoL	Reported study-by-study without synthesizing results	no significant difference
249																																														fatigue	Reported study-by-study without synthesizing results	no significant difference
249																																														depression	Reported study-by-study without synthesizing results	no significant difference
249																																							1 study	Fibromyalgia	Nabilone	Amitriptyline	N/A			Insomnia Severity Index	Reported study-by-study without synthesizing results	favored intervention
249																																														HRQoL	Reported study-by-study without synthesizing results	no significant difference
249																																														Profile of Mood States	Reported study-by-study without synthesizing results	no significant difference
257	Published SR	Cochrane Database of Systematic Reviews	Smith, LA	2015	UK	N/A	Non-profit/academic	To evaluate the effectiveness and tolerability of cannabis-based medications for chemotherapy-induced nausea and vomiting in adults with cancer.	Soley focused on medical cannabis	Cochrane Central Register of Controlled Trials (CENTRAL), MEDLINE, EMBASE, PsycINFO and LILACS	5	Cochrane Central Register of Controlled Trials (CENTRAL) (The Cochrane Library, 2015, Issue 1), MEDLINE accessed via Ovid (from 1966 to January week 3 2015), EMBASE accessed via Ovid (from 1980 to January week 3 2015), PsycINFO accessed via Ovid (from inception to January week 2 2015) and LILACS (from inception to January 2015)	Study Types: RCTs of cross-over or parallel group design with active or placebo control groups, or both Population: Adults aged 18 years and over presenting with any type of cancer and receiving chemotherapeutic treatment, independent of gender and clinical setting... For the purpose of this review, chemotherapeutic treatments were those containing cytotoxic systemic anti-cancer treatments. Inter…	Protocol mentioned, but no link or registration # reported	"licensed pharmacological interventions based on cannabinoids derived from cannabis"	Methods	Synthetic cannabinoid (e.g. nabilone, dronabinol)	Nabilone and Dronabinol used either as monotherapy or adjunct to conventional dopamine antagonists	Placebo or conventional dopamine antagonists	Neoplasms			Cancer	Clinical	Adults (18+)	Mixed		chemotherapy-induced nausea and vomiting	Yes	Yes	Cochrane’s ’Risk of bias’ tool	23	1326	NR	RCTs or quasi-RCTs	N/A	Adults (18+)	Meta-analysis	2 studies, 96 participants	Chemotherapy-induced nausea and vomitting	Cannabinoids (Nabilone or Dronabinol)		N/A		N/A	Absence of nausea	No statistical difference between groups		this review found no evidence to support the use of cannabinoids in place of current prophylactic combination anti-emetic regimens... The widespread use of cannabis-based medicines for management of nausea and vomiting with chemotherapy is unlikely due to the adverse effects they cause. However, cannabinoids are a useful ad- junctive treatment to consider for people on moderately or highly emetic…
257																																						Meta-analysis	3 studies, 168 participants	Chemotherapy-induced nausea and vomitting	Cannabinoids (Nabilone or Dronabinol)	Placebo	N/A		N/A	Absence of vomiting	Favours intervention
257																																						Meta-analysis	2 studies, 96 participants	Chemotherapy-induced nausea and vomitting	Dronabinol	Placebo	N/A		N/A	Absence of vomiting	No statistical difference between groups	subgroup analysis for dronabinol
257																																						Authors' text	1 study, 72 participants	Chemotherapy-induced nausea and vomitting	Nabilone	Placebo	N/A		N/A	Absence of vomiting	Reported study-by-study without synthesizing results	favours intervention - subgroup analysis for nabilone
257																																						Meta-analysis	3 studies, 288 participants	Chemotherapy-induced nausea and vomitting	Cannabinoids (Nabilone or Dronabinol)	Placebo	N/A		N/A	Absence of nausea and vomiting	Favours intervention	this is the 3 studies - it is further broken down to one study looking at cannabis naive patients and two looking at patients with prior cannabis use
257																																						Authors' text	1 study, 75 participants	Chemotherapy-induced nausea and vomitting	Cannabinoids (Nabilone or Dronabinol)	Placebo	N/A		N/A	Absence of nausea and vomiting	No statistical difference between groups	subgroup analysis - for cannabis naive patients -- favored cannabis over placebo
257																																						Meta-analysis	2 studies, 213 participants	Chemotherapy-induced nausea and vomitting	Cannabinoids (Nabilone or Dronabinol)	Placebo	N/A		N/A	Absence of nausea and vomiting	Favours intervention	subgroup analysis for patients who have had prior use of cannabis
257																																						Meta-analysis	2 studies, 96 participants	Chemotherapy-induced nausea and vomitting	Cannabinoids (Nabilone or Dronabinol)	Placebo	N/A		N/A	Dysphoria	No statistical difference between groups
257																																						Meta-analysis	3 studies, 137 patients	Chemotherapy-induced nausea and vomitting	Cannabinoids (Nabilone or Dronabinol)	Placebo	N/A		N/A	Feeling "high"	Favours control
257																																						Meta-analysis	2 studies, 139 patients	Chemotherapy-induced nausea and vomitting	Cannabinoids (Nabilone or Dronabinol)	Placebo	N/A		N/A	Sedation	No statistical difference between groups
257																																						Meta-analysis	2 studies, 256 participants	Chemotherapy-induced nausea and vomitting	Cannabinoids (Nabilone or Dronabinol)	Placebo	N/A		N/A	Participant preference	Favours control
257																																						Meta-analysis	2 studies, 276 participants	Chemotherapy-induced nausea and vomitting	Cannabinoids (Nabilone or Dronabinol)	Placebo	N/A		N/A	Withdrawl due to adverse events	Favours intervention
257																																						Meta-analysis	5 studies, 258 participants	Chemotherapy-induced nausea and vomitting	Cannabinoids (Nabilone or Dronabinol)	Prochlorperazine	N/A		N/A	Absence of nausea	No statistical difference between groups
257																																						Meta-analysis	3 studies, 141 participants	Chemotherapy-induced nausea and vomitting	Nabilone	Prochlorperazine	N/A		N/A	Absence of nausea	No statistical difference between groups	subgroup analysis nabilone
257																																						Meta-analysis	2 studies, 117 participants	Chemotherapy-induced nausea and vomitting	Dronabinol	Prochlorperazine	N/A		N/A	Absence of nausea	No statistical difference between groups	subgroup analysis dronabilone
257																																						Meta-analysis	4 studies, 209 participants	Chemotherapy-induced nausea and vomitting	Cannabinoids (Nabilone or Dronabinol)	Prochlorperazine	N/A		N/A	Absence of vomiting	No statistical difference between groups
257																																						Meta-analysis	2 studies, 93 participants	Chemotherapy-induced nausea and vomitting	Nabilone	Prochlorperazine	N/A		N/A	Absence of vomiting	No statistical difference between groups	subgroup analysis nabilone
257																																						Meta-analysis	2 studies, 116 participants	Chemotherapy-induced nausea and vomitting	Dronabinol	Prochlorperazine	N/A		N/A	Absence of vomiting	No statistical difference between groups	subgroup analysis dronabilone
257																																						Meta-analysis	4 studies, 414 participants	Chemotherapy-induced nausea and vomitting	Cannabinoids (Nabilone or Dronabinol)	Prochlorperazine	N/A		N/A	Absence of nausea and vomiting	No statistical difference between groups
257																																						Meta-analysis	2 studies, 116 participants	Chemotherapy-induced nausea and vomitting	Cannabinoids (Nabilone or Dronabinol)	Prochlorperazine	N/A		N/A	Absence of nausea and vomiting	No statistical difference between groups	subgroup analysis - cannabis naive
257																																						Meta-analysis	2 studies, 298 participants	Chemotherapy-induced nausea and vomitting	Cannabinoids (Nabilone or Dronabinol)	Prochlorperazine	N/A		N/A	Absence of nausea and vomiting	Favours intervention	subgroup analysis - prior cannabis use
257																																						Authors' text	1 study, 226 participants	Chemotherapy-induced nausea and vomitting	Nabilone	Prochlorperazine	N/A		N/A	Absence of nausea and vomiting	Reported study-by-study without synthesizing results	subgroup analysis - nabilone
257																																						Meta-analysis	3 studies, 188 participants	Chemotherapy-induced nausea and vomitting	Dronabinol	Prochlorperazine				Absence of nausea and vomiting	No statistical difference between groups	subgroup analysis - dronabinol
257																																						Meta-analysis	9 studies, 743 participants	Chemotherapy-induced nausea and vomitting	Cannabinoids (Nabilone or Dronabinol)	Domperidone, Prochlorperazine and metoclopramide				Dizziness	Favours intervention
257																																						Meta-analysis	7 studies, 280 participants	Chemotherapy-induced nausea and vomitting	Cannabinoids (Nabilone or Dronabinol)	Prochlorperazine				Dizziness	Favours intervention	subgroup analysis - prochloperazine as comparator
257																																						Meta-analysis	3 studies, 192 participants	Chemotherapy-induced nausea and vomitting	Cannabinoids (Nabilone or Dronabinol)	Prochlorperazine				Dysphoria	Favours intervention
257																																						Meta-analysis	4 studies, 358 participants	Chemotherapy-induced nausea and vomitting	Cannabinoids (Nabilone or Dronabinol)	Domperidone, Prochlorperazine and metoclopramide				Euphoria	Favours intervention
257																																						Meta-analysis	2 studies 280 participants	Chemotherapy-induced nausea and vomitting	Cannabinoids (Nabilone or Dronabinol)	Prochlorperazine				Euphoria	Favours intervention	subgroup analysis - prochloperazine as comparator
257																																						Meta-analysis	5 studies, 419 participants	Chemotherapy-induced nausea and vomitting	Cannabinoids (Nabilone or Dronabinol)	Prochlorperazine and Metaclopramide				Feeling "high"	Favours intervention
257																																						Meta-analysis	4 studies, 389 participants	Chemotherapy-induced nausea and vomitting	Cannabinoids (Nabilone or Dronabinol)	Prochlorperazine				Feeling "high"	Favours intervention	subgroup analysis - prochloperazine as comparator
257																																						Meta-analysis	2 studies, 144 participants	Chemotherapy-induced nausea and vomitting	Cannabinoids (Nabilone or Dronabinol)	Prochlorperazine				Hallucinations	No statistical difference between groups
257																																						Meta-analysis	6 studies, 413 participants	Chemotherapy-induced nausea and vomitting	Cannabinoids (Nabilone or Dronabinol)	Domperidone, Prochlorperazine, metoclopramide and chlorpromazine				Postural Hypotension	No statistical difference between groups
257																																						Meta-analysis	3 studies, 305 participants	Chemotherapy-induced nausea and vomitting	Cannabinoids (Nabilone or Dronabinol)	Prochlorperazine				Postural Hypotension	No statistical difference between groups	subgroup analysis - prochloperazine as comparator
257																																						Meta-analysis	11 studies, 1055 participants	Chemotherapy-induced nausea and vomitting	Cannabinoids (Nabilone or Dronabinol)	Domperidone, Prochlorperazine, metoclopramide and chlorpromazine				Sedation	Favours intervention
257																																						Meta-analysis	8 studies, 947 participants	Chemotherapy-induced nausea and vomitting	Cannabinoids (Nabilone or Dronabinol)	Prochlorperazine				Sedation	Favours intervention	subgroup analysis - prochloperazine as comparator
257																																						Meta-analysis	3 studies,317 participants	Chemotherapy-induced nausea and vomitting	Cannabinoids (Nabilone or Dronabinol)	Prochlorperazine				Depression	No statistical difference between groups
257																																						Meta-analysis	9 studies, 799 participants	Chemotherapy-induced nausea and vomitting	Cannabinoids (Nabilone or Dronabinol)	Prochlorperazine, metoclopramide and chlorpromazine				Participant preference	Favours intervention
257																																						Meta-analysis	7 studies, 695 participants	Chemotherapy-induced nausea and vomitting	Cannabinoids (Nabilone or Dronabinol)	Prochlorperazine				Participant preference	Favours intervention	subgroup analysis - prochloperazine as comparator
257																																						Meta-analysis	6 studies, 740 participants	Chemotherapy-induced nausea and vomitting	Cannabinoids (Nabilone or Dronabinol)	Domperidone and prochloperazine				Withdrawl due to adverse events	Favours intervention
257																																						Meta-analysis	5 studies, 664 participants	Chemotherapy-induced nausea and vomitting	Cannabinoids (Nabilone or Dronabinol)	Prochlorperazine				Withdrawl due to adverse events	Favours intervention	subgroup analysis - prochloperazine as comparator
257																																						Meta-analysis	2 studies, 118 participamts	Chemotherapy-induced nausea and vomitting	Cannabinoids (Nabilone or Dronabinol)	Domperidone and prochloperazine				Withdrawl due to lack of efficacy	No statistical difference between groups
257																																						Meta-analysis	2 studies, 89 participants	Chemotherapy-induced nausea and vomitting	THC + Prochlorperazine and Dronabinol + Prochlorperazine	Prochlorperazine				Absence of vomiting	No statistical difference between groups
257																																						Meta-analysis	2 studies, 105 participants	Chemotherapy-induced nausea and vomitting	THC + Prochlorperazine and Dronabinol + Prochlorperazine	Prochlorperazine				Withdrawl due to adverse events	No statistical difference between groups
260	Published SR	Canadian Family Physician	Deshpande, A	2015	Canada	N/A	Not reported	" ..to determine whether smoked or vaporized cannabis provides pain relief in the chronic noncancer pain (CNCP) population. Secondary objectives included determining its effect on function, identifying therapeutic doses, and documenting commonly associated adverse effects."	Soley focused on medical cannabis	MEDLINE, EMBASE, the International Pharmaceutical Abstracts	3	NR (searched in April 2014)	articles were included if they evaluated the effect of smoked or vaporized cannabinoids (nonsynthetic) for chronic non-cancer pain (CNCP); designed as a controlled study involving a comparison group, either concurrently or historically; and published in English in a peer-reviewed journal	Not reported	Cannabis has had a long history of use for spiritual and religious purposes, as well as for various medical conditions.3 In 1999, an Institute of Medicine report supported the use of marijuana in medicine; however, the debate about the usefulness and safety of marijuana remains unresolved	Introduction	Various types	Smoked or vaporized cannabinoids (nonsynthetic)	Comparison group either concurrently or historically	Symptoms, signs and abnormal clinical and laboratory findings, not elsewhere classified			Chronic non-cancer pain	NR	Not reported	Not reported	N/A	pain	Yes	Yes	Jadad scale'	6	226	NR	RCTs or quasi-RCTs	N/A	Adults (18+)	Authors' text	Narrative synthesis (6 studies)	various (HIV, posttraumatic neuropathy, MS)	delta-9-THC	placebo	Neuropathic Pain	pain relief	Favours intervention			"All studies reported a statistically signficiant benefit in terms of pain relief"	There is evidence for the use of low-dose medical marijuana in refractory neuropathic pain in conjunction with traditional analgesics. However, trials were limited by short duration, variability in dosing and strength of delta-9-tetrahydrocannabinol, and lack of functional outcomes. Although well tolerated in the short term, the long-term effects of psychoactive and neurocognitive effects of medi…
260																																						Authors' text	Narrative synthesis (3 studies)	various	delta-9-THC	placebo	Neuropathic Pain	pain reduction	Favours intervention			"Clinically meaningful pain reduction was reported in 3 studies, with 46%, 52%, and 61% of cannabis users reporting benefit versus 18%, 24%, and 26% of the placebo group"
260																																						Authors' text	1 study							effect on dose of other analgesic drugs, including opioids	Reported study-by-study without synthesizing results
260																																						Authors' text	Narrative synthesis (3 studies)	Posttraumatic neuropathy and HIV peripheral neuropathy	delta-9-THC	placebo				quality of life	No statistical difference between groups	"2 studies assessed quality of life and both reported no statistically significant improvement"
268	Published SR	The Journal of Pain	Andreae, M	2015	USA	N/A	Mixed	We performed an individual patient data Bayesian responder meta-analysis to study if inhaled cannabis provides relief for chronic neuropathic pain.	Soley focused on medical cannabis	Cochrane Central, PubMed, EMBASE and AMED	4	23rd of April 2014 via Ovid	We considered RCTs investigating chronic painful neuropathy. We included diabetic, traumatic and HIV-related etiologies. We excluded multiple sclerosis, a central rather than a peripheral pain condition. The nature of the intervention likely interfered with effective participant blinding 4 and which was therefore not required for study inclusion. We only included studies comparing inhaled Cannabi…	Protocol completed, and link and/or registration # reported	Not specifically defined - "Considering the recent wave of cannabis legalization, the continued legal wrangling, its widespread medicinal and recreational use,and additional randomized controlled trials [RCT] published on cannabis recently, we performed a meta-analysis to investigate if inhaled cannabis alleviates chronic neuropathic pain"	Introduction	Plant-based materials (e.g. marijuana, hashish)	inhaled whole herb cannabis	Placebo	Symptoms, signs and abnormal clinical and laboratory findings, not elsewhere classified			Chronic Neuropathic Pain	Not defined	Not reported	Not reported	diabetic, traumatic and HIV-related etiologies of chronic painful neuropathy	pain	Yes	Yes	Cochrane Risk of Bias Tool	5	178	NR	RCTs or quasi-RCTs	N/A	Adults (18+)	Meta-analysis	5 studies, 178 patients - used Bayesian methods	Chronic neuropathic pain	Inahled Cannabis	Placebo	Peripheral Neuropathic Pain		Favours intervention	Withdrawal due to adverse effects	Reported study-by-study without synthesizing results	Withdrawals due to adverse effects were rare: One case of serious adverse effects leading to withdrawal occurred in the placebo group, e.g. a case of psychosis and two others in active treatment groups (e.g., hypertension and increased pain). Not enough data to pool studies	Our individual patient data meta-analysis suggests that inhaled cannabis results in short term benefits for chronic neuropathic pain with a NNT of 5.6 [3.4, 13] CRI95% (Figure 3: Forrest Plot). We lack evidence regarding sustained long-term benefits and risks in the community setting. The small number of included studies and participants (Table 1: Summary of included studies) and risk of detectio…
283	Published SR	JAMA	Whiting, P	2015	UK	N/A	Government	The aim of this systematic review was to evaluate the evidence for the benefits and adverse events (AEs) of medical cannabinoids across a broad range of indications.	Soley focused on medical cannabis	Cochrane Database of Systematic Reviews (CDSR) (Wiley), Database of Abstracts of Reviews of Effects (DARE) (Wiley), Health Technology Assessment database (HTA) (Wiley), NHS Economic Evaluations Database (NHS EED) (Wiley), International Network of Agencies for Health Technology Assessment (INAHTA) (Internet), International Information Network on New and Emerging Health Technologies (EuroScan) (Int…	28	inception to April 2015 - exceptions: mRCT) (Internet): up to April 2014; DARE, HTA, NHS EED: January 2015 CENTRAL - March 2015	Randomized clinical trials (RCTs) that compared cannabi- noids with usual care, placebo, or no treatment in the follow- ing indications were eligible: nausea and vomiting due to chemotherapy, appetite stimulation in HIV/AIDS, chronic pain, spasticity due to multiple sclerosis (MS) or paraplegia, depression, anxiety disorder, sleep disorder, psychosis, intra- ocular pressure in glaucoma, or Touret…	Protocol completed, and link and/or registration # reported	Medical cannabis refers to the use of cannabis or canna- binoids as medical therapy to treat disease or alleviate symptoms.	Introduction	Various types	THC, CBD, cannabis, dronabinol, nabilone, nabiximols, levonantradol, ECP002A, THC/CBD, ajulemic acid	usual care, placebo, or no treatment	Neoplasms	Mental and behavioural disorders	Diseases of the nervous system	cancer (chemotherapy induced nausea and vomiting), appetite stimulation for HIV/AIDS, chronic pain, spasticity due to multiple sclerosis (MS) or paraplegia, depression, anxiety disorder, sleep disorder, psychosis, intraocular pressure in glaucoma, or Tourette syndrome	Not reported	Not reported	Not reported	NA	nausea or vomiting, appetite stimulation, chronic pain, spasticity, anxiety, depression, psychosis, sleep disorder,glaucoma	Yes	No	Cochrane Risk of Bias tool	79	6462		RCTs or quasi-RCTs	RCTs	Not reported	Meta-analysis	Pain reduction ≥30% NRS or VAS scores; 8 studies	Chronic pain (neuropathic and cancer pain)	THC (smoked) or Nabiximols	placebo	Other (specify in AZ)	neuropathic pain or cancer pain	No statistical difference between groups				There was moderate-quality evidence to support the use of cannabinoids for the treatment of chronic pain and spastic- ity. There was low-quality evidence suggesting that canna- binoids were associated with improvements in nausea and vomiting due to chemotherapy, weight gain in HIV, sleep disorders, and Tourette syndrome. Cannabinoids were asso- ciated with an increased risk of short-term AEs.
283																																						Meta-analysis	3 studies	Nausea and vomiting due to chemotherapy	Dronabinol or Nabiximols	placebo	N/A			Nausea and vomiting Complete response	Favours intervention
283																																						Meta-analysis	Pain NRS scores (0-10) WMD; 6 studies	Chronic pain (neuropathic and cancer pain)	Nabiximols	placebo	Other (specify in AZ)	neuropathic pain or cancer pain	Favours intervention
283																																						Meta-analysis	Pain Brief Pain Inventory-Short Form scale (0 to 10) WMD; 3 studies	Chronic pain (neuropathic and cancer pain)	Nabiximols	placebo	Other (specify in AZ)	neuropathic pain or cancer pain	No statistical difference between groups
283																																						Meta-analysis	Patient global impression of change- OR; 6 studies	Chronic pain (neuropathic and cancer pain)	Nabiximols and Nabilone	placebo	Other (specify in AZ)	neuropathic pain or cancer pain	Favours intervention
283																																						Meta-analysis	Neuropathic Pain Scale (0-100) WMD; 5 studies	neuropathic pain	Nabiximols	placebo	Neuropathic Pain		Favours intervention
283																																						Meta-analysis	3 studies	Chronic pain (neuropathic and cancer pain)	Nabiximols	placebo				Quality of life EQ-5D scale (0 to 100) WMD	No statistical difference between groups
283																																						Meta-analysis	2 studies	Spasticity due to multiple sclerosis	Nabiximols	placebo				50% Reduction in spasticity symptoms NRS (0-10) OR	No statistical difference between groups
283																																						Meta-analysis	2 studies	Spasticity due to multiple sclerosis	Nabiximols	placebo				30% Reduction in spasticity symptoms NRS OR	No statistical difference between groups
283																																						Meta-analysis	5 studies	Spasticity due to multiple sclerosis	Nabiximols, THC/CBD, dronabinol	placebo				Change in Ashworth Score for Cannabinoid	No statistical difference between groups
283																																						Meta-analysis	4 studies	Spasticity due to multiple sclerosis	Nabiximols	placebo				Change in Ashworth Score for Cannabinoid	No statistical difference between groups	subgroup analysis - nabiximols; other strata are not MAs so did not record
283																																						Meta-analysis	3 studies	Spasticity due to multiple sclerosis	Nabiximols and Nabilone	placebo				Spasticity NRS or VAS scores	Favours intervention
283																																						Meta-analysis	4 studies	Spasticity due to multiple sclerosis	Nabilone	placebo				ADLs - Barthel Index of ADL	No statistical difference between groups	this was a subgroup analysis for nabilone amongst studies on nabilone, dronabinol and THC/CBD that reported on ADLs - but they do not report the pooled estimate for all of these, and other subgroups are not MAs as they only have 1 study so I did not extract
283																																						Meta-analysis	2 studies	Spasticity due to multiple sclerosis	Nabiximols	placebo				Walking speed as assessed by timing - WMD	No statistical difference between groups
283																																						Meta-analysis	3 studies	Spasticity due to multiple sclerosis	Nabiximols	placebo				Global Impression Patient global impression of change	Favours intervention
283																																						Meta-analysis	8 studies - states in other indications	Sleep Disorder	Nabiximols and THC/CBD	placebo				Sleep quality NRS (0-10) WMD	Favours intervention
283																																						Meta-analysis	3 studies - states in other indications	Sleep Disorder	Nabiximols	placebo				Sleep disturbance NRS (0-10) WMD	No statistical difference between groups
283																																						Meta-analysis	Unclear how many studies included	All conditions	Cannabinoids	Placebo or active drug				Any adverse effects	No statistical difference between groups
283																																						Meta-analysis	Unclear how many studies included	All conditions	Cannabinoids	Placebo or active drug				Serious Adverse Events	No statistical difference between groups
283																																						Meta-analysis	Unclear how many studies included	All conditions	Cannabinoids	Placebo or active drug				Withdrawal due to adverse events	No statistical difference between groups
317	Published SR	Journal of Crohn's and Colitis	Langhorst, J	2015	Germany	N/A	Non-profit/academic	"We performed a systematic review for Complementary and Alternative Medicine [CAM] as defined by the National Institute of Health in Inflammatory Bowel Disease [IBD], ie Crohn’s disease [CD] and ulcerative colitis [UC], with the exception of dietary and nutritional supplements, and manipulative therapies."	Various CAM interventions (cannabis being one)	Pubmed/MEDLINE, Scopus, Cochrane CENTRAL, PsycInfo	4	Inception - March 12, 2014	Types of study designs: controlled clinical trials, randomized controlled trials, randomized controlled cross-over trials, cluster randomized trials. Studies that investigated the effects of therapies within one group only [eg dosage-finding studies] were not considered eligible. Types of participants: Studies of patients diagnosed with ulcerative colitis and/or Crohn’s disease were eligible, reg…	Protocol mentioned, but no link or registration # reported	Not defined	Not defined	Not reported	Not defined in the methods (assume they included under "herbs")	NR	Diseases of the digestive system			Inflammatory bowel disease (Crohn's, ulcerative colitis, IBS?)	NR	Mixed (adults and children)	Not reported	N/A	Treatment of IBD	Yes	No	Cochrane RoB (using 2006 methods guidelines for SRs from Cochrane Musculoskeletal group)	1	22	N/A	RCTs or quasi-RCTs	N/A	Not reported	Authors' text	Narrative (no synthesis - just 1 study)	Crohn's disease	Cannabis sativa cigarettes	placebo cigarettes from which THC was removed				Response rate (>100 reduction in Crohn's disease activity index [CDAI] scores	Reported study-by-study without synthesizing results	Only 1 RCT was summarized, which found signficant group differences favouring cannabis for response rate and QoL, but not for remission rate	"...the variety of drug formulations and missing dosages in studies limit the benefit of information. In addition, most of the introduced herbs and botanicals have a registration as food supplements, and some have an approval as pharmaceuticals, influencing the quality of the products. In the case of cannabis, additional special restrictions to availability may be of importance. In addition, it h…
317																																						Authors' text	Narrative (no synthesis - just 1 study)	Crohn's disease	Cannabis sativa cigarettes	placebo cigarettes from which THC was removed				quality of life	Reported study-by-study without synthesizing results
317																																						Authors' text	Narrative (no synthesis - just 1 study)	Crohn's disease	Cannabis sativa cigarettes	placebo cigarettes from which THC was removed				remission rate (CDAI <150)	Reported study-by-study without synthesizing results
336	Published SR	Cochrane Database of Systematic Reviews	McLoughlin, BC	2014	UK	N/A	Non-profit/academic	Three objectives, the third of which is relevant: "To assess the effects of specific psychological treatments for cannabis reduction in people with schizophrenia. To assess the effects of antipsychotics for cannabis reduction in people with schizophrenia. To assess the effects of cannabinoids for symptom reduction in people with schizophrenia."	Includes both medical cannabis and other cannabis use	Cochrane Schizophrenia Group register, which runs regular searches of BIOSIS, CINAHL, EMBASE, MEDLINE, PUBMED and PsycINFO.	6	2013-08-12	We included all randomised controlled trials involving cannabinoids and schizophrenia/schizophrenia-like illnesses, which assessed: 1) treatments to reduce cannabis use in people with schizophrenia; 2) the effects of cannabinoids on people with schizophrenia.	Protocol mentioned, but no link or registration # reported	Cannabis is used [in those with schizophrenia] to reduce distressing psychotic symptoms as a form of self-medication, or to reduce the unpleasant adverse effects caused by antipsychotic drug treatment. It has also been proposed that the negative symptoms of schizophrenia (affective flattening, poor volition, poverty of thought, social withdrawal) may be improved by the use of cannabis	Introduction	Various types	"...cannabinoids: these are cannabis related compounds either derived from the cannabis plant or synthetically manufactured."	placebo or antipsychotics	Mental and behavioural disorders			Schizophrenia	NR	Not reported	Not reported	Schizophrenics	symtpom reduction	Yes	Yes	Cochranr RoB	1	42	N/A	RCTs or quasi-RCTs	N/A	Adults (18+)	Authors' text	1 study, no synthesis	Schizophrenia	cannabidiol	amisulpride				mental state outcomes (BPRS and PANNS)	Reported study-by-study without synthesizing results	"there is some slight suggestion that cannabidiol may be have some antipsychotic characteristics, however this result is based on one short term follow-up and from a very small trial, this overall lack of effect may have been because there was a lack of power to detect a difference in this one very small study."	For cannabis as treatment question: " no data were reported for any of the main outcomes of interest at medium term. There were short-term data reported for mental state using the BPRS and PANSS, no overall differences in mental state were observed between treatment groups." Overall conclusions: The question most frequently asked in reference to the relationship between cannabis and schizophrenia…
352	Published Guideline with SR	Neurology	Koppel, B	2014	NR	USA	Non-profit/academic	This evidence-based systematic review seeks to answer questions regarding safety and efficacy of cannabinoids in relieving/reducing the following: 1. Spasticity in patients with multiple sclerosis (MS) 2. Central pain and painful spasms in MS (pain could be from any etiology, including spasticity, but excluding neuropathic pain) 3. Bladder dysfunction in MS 4. Involuntary movements, including tre…	Soley focused on medical cannabis	Medline, EMBASE, PsycINFO, Web of Science, and Scopus	5	Medline 1948 to February 2011 and updated November 2013; Web of Science and Scopus: January 2013 and November, 2013; EMBASE 1974 to January 2013 and updated November 2013; PsychINFO- 1806- January 2013 and updated November 2013	We examined the listed conditions and excluded non-neurologic pain (e.g., cancer, surgery related) as well as other non-neurologic conditions (e.g., nausea). Surveys, case reports/series, and non–placebo-controlled trials were excluded.	Not reported	Not defined	Not defined	Various types	extracts, synthetics and smoked marijuana	Placebo (say they excluded non-placebo controlled trials)	Diseases of the nervous system			Multiple sclerosis, Huntington disease, Parkinson disease, cervical dystonia and Tourette syndrome, epilepsy	NR	Not reported	Not reported	N/A	spasticity, pain, bladder dysfunction, involuntary movements, seizures	No	No	American Academy of Neurology's classification scheme	34	1619	NR	Not reported		Not reported	Authors' text	Authors provide conclusions after summarizing study-by-study results	Multiple sclerosis	Oral cannabis extract	placebo				spasticity (patient reported)	Reported study-by-study without synthesizing results	OCE is established as effective for reducing patient-reported scores (2 Class I studies). OCE is probably ineffective for reducing objective measures at 12–15 weeks (1 Class I study) but possibly effective at 1 year (1 Class II study11).	Future research with randomized controlled studies is necessary in order to determine the efficacy of this medication class. The present review downgraded some studies for inadequate outcome concealment and comparison of baseline characteristics. Some studies were underpowered to detect differences; others had too many dropouts for reliable conclusions to be drawn. Cannabinoids should be studied …
352																																						Authors' text	Authors provide conclusions after summarizing study-by-study results	Multiple sclerosis	THC	placebo				spasticity (patient reported)	Reported study-by-study without synthesizing results	THC is probably effective for reducing patient reported scores (1 Class I study). THC is probably ineffective for reducing objective measures at 15 weeks (1 Class I study) but possibly effective at 1 year (1 Class II study).
352																																						Authors' text	Authors provide conclusions after summarizing study-by-study results	Multiple sclerosis	Nabiximols	placebo				spasticity (patient reported)	Reported study-by-study without synthesizing results	Nabiximols is probably effective for reducing patient-reported symptoms at 6 weeks (1 Class I study) and probably ineffective for reducing objective measures at 6 weeks (1 Class I study).
352																																						Authors' text	Authors provide conclusions after summarizing study-by-study results	Multiple sclerosis	Smoked marijuana	placebo				spasticity (patient reported)	Reported study-by-study without synthesizing results	insufficient evidence
352																																						Authors' text	Authors provide conclusions after summarizing study-by-study results	Multiple sclerosis	Oral cannabis extract	placebo	Central Neuropathic Pain	Central pain or painful spasms	Reported study-by-study without synthesizing results			For patients with MS with central pain or painful spasms, OCE is effective for reduction of central pain (2 Class I studies).
352																																						Authors' text	Authors provide conclusions after summarizing study-by-study results	Multiple sclerosis	THC	placebo	Central Neuropathic Pain	Central pain or painful spasms	Reported study-by-study without synthesizing results			THC or nabiximols (1 Class I study each) are probably effective for treating Ms related pain or painful spasms.
352																																						Authors' text	Authors provide conclusions after summarizing study-by-study results	Multiple sclerosis	Nabiximols	placebo	Central Neuropathic Pain	Central pain or painful spasms	Reported study-by-study without synthesizing results
352																																						Authors' text	Authors provide conclusions after summarizing study-by-study results	Multiple sclerosis	Smoked marijuana	placebo	Central Neuropathic Pain	Central pain or painful spasms	Reported study-by-study without synthesizing results			Smoked marijuana is of unclear efficacy for reducing pain (2 Class III studies that examined different issues).
352																																						Authors' text	Authors provide conclusions after summarizing study-by-study results	Multiple sclerosis	Nabiximols	placebo				Bladder voids per day at 10 weeks	Reported study-by-study without synthesizing results	Nabiximols is probably effective for reducing the number of bladder voids per day at 10 weeks (1 Class I study).
352																																						Authors' text	Authors provide conclusions after summarizing study-by-study results	Multiple sclerosis	THC and oral cannabis extract	placebo				bladder complaints	Reported study-by-study without synthesizing results	THC and OCE are probably ineffective for reducing bladder complaints (1 Class I study).
352																																						Authors' text	Authors provide conclusions after summarizing study-by-study results	Multiple sclerosis	Nabiximols	placebo				overall bladder symptoms	Reported study-by-study without synthesizing results	Nabiximols is of unknown efficacy in reducing overall bladder symptoms (contradictory Class I studies).
352																																						Authors' text	Authors provide conclusions after summarizing study-by-study results	Multiple sclerosis	THC and oral cannabis extract	placebo				tremor in MS	Reported study-by-study without synthesizing results	THC and OCE are probably ineffective for treating MS-related tremor (1 Class I study).
352																																						Authors' text	Authors provide conclusions after summarizing study-by-study results	Multiple sclerosis	Nabiximols	placebo				tremor in MS	Reported study-by-study without synthesizing results	Nabiximols is possibly ineffective (1 Class II study).
352																																						Authors' text	Authors provide conclusions after summarizing study-by-study results	Huntington disease	Nabilone or CBD capsules	placebo				symptomatic HD treatment	Reported study-by-study without synthesizing results	Whereas 2 studies suggest lack of benefit, both were underpowered to detect differences, and thus no reliable conclusions can be drawn
352																																						Authors' text	Authors provide conclusions after summarizing study-by-study results	Parkinson disease	Oral cannabis extract	placebo				levodopa-induced dyskinesias	Reported study-by-study without synthesizing results	OCE is probably ineffective for treating levodopa-induced dyskinesias in patients with Parkinson disease (1 Class I study).
352																																						Authors' text	Authors provide conclusions after summarizing study-by-study results	Tourette syndrome	THC	placebo				tic severity	Reported study-by-study without synthesizing results	For patients with Tourette syndrome, data are insufficient to support or refute efficacy of THC for reducing tic severity (1 Class II study, 1 Class III study).
352																																						Authors' text	Authors provide conclusions after summarizing study-by-study results	Cervical dystonia	Dronabinol	placebo				NR	Reported study-by-study without synthesizing results	For patients with cervical dystonia, data are insufficient to support or refute the efficacy of dronabinol.
352																																						Authors' text	Authors provide conclusions after summarizing study-by-study results	Epilepsy	Cannabinoids	placebo				seizure frequency	Reported study-by-study without synthesizing results	For patients with epilepsy, data are insufficient to support or refute the efficacy of cannabinoids for reducing seizure frequency (no Class I–III studies).
352																																						Meta-analysis		All neurological diseases	Cannabinoids	placebo				discontinuation of medication because of AEs	Favours control	Meta-analysis of simple proportions yielded 6.9% (95% CI 5.7%–8.2%) who stopped the medication because of AEs. Of the 1,118 who received placebo, 2.2% (95% CI 1.6%–3.5%) stopped because of AEs.
355	Published SR	Sleep Medicine Reviews	Gates, P	2014	Australia	N/A	Not reported	In order to clarify the effects of cannabis on sleep, we conducted a systematic review of all papers which included human participants and an assessment of sleep following the administration of a measured cannabis dose.	Includes both medical cannabis and other cannabis use	Embase, CINAHL, Cochrane Library/EBM Reviews, Medline, and PsycINFO for published studies and Project Cork, DRUG, and PsycEXTRA	8	NR	we include: 1) studies that used either objective or subjective measures of sleep; 2) studies that involved the administration of any cannabinoid or CBM; and 3) an assessment of the risk of bias present in each study. Review papers, posters, qualitative articles, opinion pieces, letters or editorials, case reports (final N < 7), and published abstracts were excluded. For purposes of this review, …	Not reported	Looking at both medical use and other use for the purposes of sleep: "medicinal cannabis use has recently been described to alleviate sleep problems by medicinal users, while cannabis use is a reported risk factor for sleep problems in the community."	Introduction	Not reported	Assume they are including all types; just refer to "cannabis" - cannabinoids or cannabis-based medicine (CBM)	NR	Diseases of the nervous system			Various conditions/illnesses, but they are looking at sleep as the "disorder"	NR	Not reported	Not reported	N/A	sleep problems	No	No	a custom assessment of article quality and risk of bias was purpose built following suggestions from the Cochrane Collaboration’s Risk of Bias Assessment Tool, the Effective Practice and Organisation of Care Review Group Data Collection Checklist and the assessments of risk of bias by Viswanathan and colleagues.	28	3658	NR	Various (specify in column Ak)	They state they included clinical trials, but unclear from description of studies	Adults (18+)	Authors' text	Narrative synthesis of 28 studies	various (pain, MS, anorexia, cancer, immune deficiency)	Synthetics, cannabis extracts and nabiximols	NR				Impact on sleep	Favours intervention	Although the majority of studies did not include a validated measure of sleep, most studies reported a significant and positive impact on sleep in the clinical trial. That is, 20 studies showed an improvement to sleep, although this improvement was no longer significant at the end of the experiment in two studies while one study did not report on sleep per se but showed a lessening of bad dreams.	The results of the reviewed studies, although mixed, indicate that cannabis may have an effect on various aspects of sleep, including sleep architecture and subjective sleep quality. Given the risk of bias associated with the reviewed studies, there is a clear need for a large scale, longitudinal and well controlled study on the specific effects of cannabinoids on sleep. The health impact of thes…
355																																						Authors' text	Narrative synthesis of 5 studies	various (pain, MS, anorexia, cancer, immune deficiency)	Cannabis-based medicine	Experimental drugs				Impact on sleep	Unclear efficacy (insufficient evidence)	Evidence is mixed
355																																						Authors' text	Narrative synthesis of 7 studies	various (pain, MS, anorexia, cancer, immune deficiency)	Synthetics, cannabis extracts and nabiximols	NR				Subjective measure of sleep	Unclear efficacy (insufficient evidence)	"The results from these seven studies were varied"
355																																						Authors' text	Narrative synthesis of 2 studies	various (pain, MS, anorexia, cancer, immune deficiency)	Synthetics, cannabis extracts and nabiximols	NR				Objective measure of sleep	Reported study-by-study without synthesizing results
355																																						Authors' text	Narrative synthesis of 2 studies	various (pain, MS, anorexia, cancer, immune deficiency)	Synthetics, cannabis extracts and nabiximols	NR				Effect of dose on sleep	Reported study-by-study without synthesizing results
359	Published Guideline with SR	Neurology	Yadav, V	2014	NR	USA	Non-profit/academic	This guideline addresses the following questions: In patients with MS, 1. do CAM therapies reduce specific symptoms and prevent relapses or disability? 2. can CAM use worsen MS or cause serious adverse effects (SAEs)? 3. can CAM use interfere with MS disease-modifying therapies?	Various CAM interventions (cannabis being one)	Medline, Web of Science, EMBASE, Cochrane, and Allied and Complementary Medicine Database	5	First search: 1970–March 2011 / Second Search (Medline only): March 2011 to September 2013	We included all human randomized, controlled trials (RCTs); cohort studies; case-control studies; and case series (those with N ≥ 10 or addressing AEs) of MS and CAM therapies that evaluated outcomes pertaining to specific MS symptoms, relapses, progression, or AEs.	Not reported	Not defined	Not defined	Various types	Orally administered cannabinoids (cannabis extract, synthetic THC), mucosally delivered cannabinoids (cannabis extract oral spray, nabiximols [trade name Sativex]), and smoked cannabis	Not Defined	Diseases of the nervous system			Multiple Sclerosis	Not Defined	Not reported	Not reported	NA	Central Neuropathic Pain or Pain due to Spasticity, Tremor and Bladder Symptoms	Yes	Yes	AAN classification scheme for therapeutic articles	19	NR	NR	Various (specify in column Ak)	RCTs, Open-label Studies and multiple unclear	Not reported	Authors' text	Narrative Synthesis - 9 studies; Authors provide conclusions after summarizing study-by-study results	Multiple Sclerosis	OCE	Placebo	Central Neuropathic Pain		Reported study-by-study without synthesizing results	Spasticity Symptoms	Reported study-by-study without synthesizing results	OCE is established as effective for reduc- ing patient-reported spasticity symptoms and pain (12–15 weeks; 2 Class I,13,14 1 Class III18). This subjective benefit is possibly maintained for 1 year (1 Class II17).	Clinicians might offer OCE to patients with MS to reduce patient- reported symptoms of spasticity and pain (excluding central neuropathic pain) (Level A) and might counsel patients that this symptomatic benefit is possibly maintained for 1 year (Level C), although OCE is probably ineffective for improving objective spastic- ity measures (short-term) or tremor (Level B). Clinicians might offer THC…
359																																						Authors' text	Narrative Synthesis - 9 studies; Authors provide conclusions after summarizing study-by-study results	Multiple Sclerosis	THC	Placebo	Central Neuropathic Pain		Reported study-by-study without synthesizing results	Spasticity Symptoms	Reported study-by-study without synthesizing results	THC is probably effective for reducing patient- reported symptoms of spasticity and pain (15 weeks, 1 Class I13). This subjective benefit is possibly main- tained for 1 year (1 Class II17).
359																																						Authors' text	Narrative Synthesis - 9 studies; Authors provide conclusions after summarizing study-by-study results	Multiple Sclerosis	OCE and THC	Placebo				Objective Spasticity Measures (15 weeks)	Reported study-by-study without synthesizing results	OCE and THC are probably ineffective for reducing both objective spasticity measures and MS-related tremor symptoms (15 weeks, 1 Class I13)
359																																						Authors' text	Narrative Synthesis - 9 studies; Authors provide conclusions after summarizing study-by-study results	Multiple Sclerosis	OCE and THC	Placebo				MS-related Tremor Symptoms	Reported study-by-study without synthesizing results	^^
359																																						Authors' text	Narrative Synthesis - 9 studies; Authors provide conclusions after summarizing study-by-study results	Multiple Sclerosis	OCE and THC	Placebo				Symptoms and Objective Spasticity Measures (over 1 year)	Reported study-by-study without synthesizing results	OCE and THC are possibly effective for reducing symptoms and objective measures of spasticity over 1 year (1 Class II17).
359																																						Authors' text	Authors provide conclusions after summarizing study-by-study results	Multiple Sclerosis	Sativex	Placebo				subjective spasticity symptoms (6 weeks)	Reported study-by-study without synthesizing results	Sativex oromucosal cannabinoid spray is probably effective for improving subjective spasticity symptoms (6 weeks, 1 Class I23), pain (5 weeks, 1 Class I24), and urinary frequency (10 weeks, 1 Class I25).
359																																						Authors' text	Authors provide conclusions after summarizing study-by-study results	Multiple Sclerosis	Sativex	Placebo	Central Neuropathic Pain		Reported study-by-study without synthesizing results			Sativex oromucosal cannabinoid spray is probably effective for improving subjective spasticity symptoms (6 weeks, 1 Class I23), pain (5 weeks, 1 Class I24), and urinary frequency (10 weeks, 1 Class I25).
359																																						Authors' text	Authors provide conclusions after summarizing study-by-study results	Multiple Sclerosis	Sativex	Placebo				urinary frequency (10 weeks)	Reported study-by-study without synthesizing results	Sativex oromucosal cannabinoid spray is probably effective for improving subjective spasticity symptoms (6 weeks, 1 Class I23), pain (5 weeks, 1 Class I24), and urinary frequency (10 weeks, 1 Class I25).
359																																						Authors' text	Authors provide conclusions after summarizing study-by-study results	Multiple Sclerosis	Sativex	Placebo				Objective Spasticity Measures (over 6 weeks)	Reported study-by-study without synthesizing results	Sativex oromucosal cannabinoid spray is probably ineffective for reducing objective spasticity measures over 6 weeks (1 Class I23) or bladder incontinence episodes over 10 weeks (1 Class I25).
359																																						Authors' text	Authors provide conclusions after summarizing study-by-study results	Multiple Sclerosis	Sativex	Placebo				Bladder Incontinence Episodes	Reported study-by-study without synthesizing results	^^
359																																						Authors' text	Authors provide conclusions after summarizing study-by-study results	Multiple Sclerosis	Sativex	Placebo				MS-related tremor (over 15 weeks)	Reported study-by-study without synthesizing results	Sativex oromucosal spray is possibly ineffective for reducing MS-related tremor over 15 weeks (1 Class II26).
359																																						Authors' text	Authors provide conclusions after summarizing study-by-study results	Multiple Sclerosis	Smoked Cannabis	Placebo	Pain		Reported study-by-study without synthesizing results	Spasticity	Reported study-by-study without synthesizing results	Data are inadequate to determine the safety or efficacy of smoked cannabis used for spasticity/pain (1 Class III31), balance/posture (1 Class III32), and cognition (1 Class III31).
359																																						Authors' text	Authors provide conclusions after summarizing study-by-study results	Multiple Sclerosis	Smoked Cannabis	Placebo				Balance	Reported study-by-study without synthesizing results	^^
359																																						Authors' text	Authors provide conclusions after summarizing study-by-study results	Multiple Sclerosis	Smoked Cannabis	Placebo				Posture	Reported study-by-study without synthesizing results	^^^
359																																						Authors' text	Authors provide conclusions after summarizing study-by-study results	Multiple Sclerosis	Smoked Cannabis	Placebo				Cognition	Reported study-by-study without synthesizing results	^^^^
366	Published SR	Ageing Research Reviews	van den Elsen, G	2014	The Netherlands	N/A	Government	In the current systematic review we aimed to provide broader evidence on the safety and efficacy of medical cannabinoids in older subjects, independent of the reasons for prescription or the patients’ cognitive status.	Soley focused on medical cannabis	PubMed, EMBASE, CINAHL and Cochrane Library databases	4	up to October 7th 2013	(1) included exclusively older subjects (defined as ≥65 years) or a distinct subgroup of older subjects and provided sep- arate results on this subgroup; (2) studied the efficacy, safety or pharmacokinetics of medical cannabinoids administered by any route, at any dose and for any duration; (3) were prospective, controlled intervention trials and; (4) provided data on efficacy, safety, or pharmac…	Protocol mentioned, but no link or registration # reported	Not explicitly defined - "For many centuries the cannabis plant (Cannabis sativa L.) has been used worldwide for medical as well as recreational purposes. Possible indications of cannabis, such as cancer pain, cachexia and neuropathic pain, are found in a quickly growing population of older patients. Unfortunately, there are only limited data on the extent of the use of medicinal cannabinoids in …	Introduction	Various types	From Results - THC administered as tablet, THC in combination with cannabidiol (CBD) administered as tablet or as sublingual spray - Dronabinol	NR	Neoplasms	Diseases of the respiratory system	Diseases of the nervous system	From Results - Alzheimer's Disease, Parkinson’s disease, chemotherapy induced nausea and vomiting, Chronic Obstructive Pulmonary Disease (COPD)	Not Defined	Adults (18+)	Not reported	≥65 years	From Results - Various; Studied indications were anorexia and behavioral disturbances in dementia, dyskinesia in Parkinson’s disease, chemotherapy induced nausea and vomiting, and breathlessness in Chronic Obstructive Pulmonary Disease (COPD)	Yes	No	modified Effective Practice and Organization of Care form	5	267 (of which 262 were included in their analysis)	NR	RCTs or quasi-RCTs	N/A	Adults (18+)	Authors' text	1 study - mentioned in overall conclusions	Chemotherapy-induced nausea and vomiting	THC	Prochlorperazine				Nausea and Vomiting	Reported study-by-study without synthesizing results	THC did not improve chemotherapy related nausea and vomi- ting (Ungerleider et al., 1982), compared to prochlorperazine.	The five studies that did report on older subjects showed no efficacy on dyskinesia, breathlessness (versus placebo) and chemotherapy induced nau- sea and vomiting (versus prochlorperazine). Studies on oral THC in symptomatic treatment of behavioral problems in dementia did not prove efficacy, because of the small sizes and overall low to moderate methodological quality... With the growing number…
366																																						Authors' text	1 study - mentioned in overall conclusions	COPD	THC+CBD	Placebo				Breathlessness	Reported study-by-study without synthesizing results	treatment with THC combined with CBD did not result in a statistical significant improvement of breath- lessness in COPD (Pickering et al., 2011)
366																																						Authors' text	1 study - mentioned in overall conclusions	Parkinson's Disease	THC+CBD	Placebo				Dyskinesia	Reported study-by-study without synthesizing results	treatment with THC combined with CBD did not result in a statistical significant improvement of breath- lessness in COPD (Pickering et al., 2011) or dyskinesia in Parkinson’s disease (Carroll et al., 2004), compared to placebo.
366																																						Authors' text	1 study - mentioned in overall conclusion	Alzheimer's Disease	Dronabinol	Placebo				Behavioral disturbances	Reported study-by-study without synthesizing results	unclear efficacy -- This subject received dronabinol for two weeks, followed by placebo. There was no washout period. Behavioral disturbances declined during the entire 4 week study period, as measured with the Neuropsychi- atric Inventory. In the other subject, who received placebo first, nighttime motor activity reduced only during the first week of dronabinol treatment and increased again in t…
366																																						Authors' text	1 study	Alzheimer's Disease (Food Refusal)	Dronabinol	Placebo				Weight Gain	Reported study-by-study without synthesizing results	seems to favor intervention -- The publication from Volicer and colleagues reported an increase in body weight during the study period of 12 weeks, regardless of the order of treatment. Weight gain was greater for subjects who received dronabinol first. In the first 6-week treatment period subjects receiving dronabinol gained 7.0 ± 1.5 lb compared to 4.6±1.3lb in subjects receiving placebo. Calor…
366																																						Authors' text	1 study	Alzheimer's Disease	Dronabinol	Placebo				Triceps skin fold thickness	Reported study-by-study without synthesizing results	seems to be ineffective -- Triceps skin fold thickness seemed to increase during the total study period, but was not affected by treatment or order of treatment
366																																						Authors' text	2 study	Alzheimer's Disease	Dronabinol	Placebo				Disturbed behavior (measured with CMAI)	Reported study-by-study without synthesizing results	seems to favor intervention -- Disturbed behavior, as measured with CMAI, decreased during both dronabinol periods and this decrease persisted during the placebo period following dronabinol.
423	Published SR	Cochrane Database of Systematic Reviews	Lutge, EE	2013	South Africa	N/A	Not reported	To assess whether [medical use] of cannabis (in its natural or artificially produced form), either smoked or ingested, decreases the morbidity or mortality of patients infected with HIV.	Soley focused on medical cannabis	CENTRAL/CCTR, PubMed, EMBASE, ClinicalTrials.gov, AEGIS, AIDsearch, WHO ICTRP	7	Three searches were performed, the first on 16 November 2007, covering the period from 1980 to 2007, the second on 15 December 2010, covering the period from 2006/7 to 2010 and the third on 30 July 2012, covering the period from 2010 to July 2012.	Randomised controlled trials (RCTs) of any cannabis intervention, in any form, and administered by any route, in adults with HIV or AIDS, were included. Studies could compare cannabis with placebo or with a known effective treatment, or with different forms or routes of administration of THC. Trials with within subject randomisation or cross-over designs using any form of cannabis as an intervent…	Not reported	While cannabis has been used for centuries for its psychoactive properties, THC and various cannabinoid receptor agonists have been investigated as medicines for a wide range of conditions	Introduction	Various types	Includes plant-based materials (marijuana and hashish) and synthetics (e.g. dronabinol)	Placebo, no drug or other form of cannabis	Certain infectious and parasitic diseases			HIV/AIDS	hospital, outpatient clinic or home care setting	Adults (18+)	Not reported	N/A	Mobidity and mortality	Yes	Yes	Cochrane RoB	7	330	NR	RCTs or quasi-RCTs	RCTs	Adults (18+)	Authors' text	Narrative	HIV/Aids	dronabinol or marijuana (high or low dose)	placebo				change in weight	Reported study-by-study without synthesizing results		Despite dronabinol being registered by at least some medicines regulatory authorities for the treatment of AIDS-associated anorexia, and some jurisdictions making allowances for the “medical” use of marijuana by patients with HIV/AIDS, evidence for the efficacy and safety of cannabis and cannabinoids in this setting is lacking. Such studies as have been performed have been of short duration, in s…
423																																						Authors' text	Narrative	HIV/Aids	dronabinol	placebo				change in body fat	Reported study-by-study without synthesizing results
423																																						Authors' text	Narrative	HIV/Aids	dronabinol	placebo				change in appetite	Reported study-by-study without synthesizing results
423																																						Authors' text	Narrative	HIV/Aids	dronabinol or marijuana (high or low dose)	placebo				change in food and caloric intake	Reported study-by-study without synthesizing results
423																																						Authors' text	Narrative	HIV/Aids	dronabinol	placebo				change in nausea and vomiting	Reported study-by-study without synthesizing results
423																																						Authors' text	Narrative	HIV/Aids	dronabinol or marijuana (high or low dose)	placebo				change in performance	Reported study-by-study without synthesizing results
423																																						Range of effects with Cis		HIV/Aids	dronabinol	placebo				change in mood	Reported study-by-study without synthesizing results
423																																						Authors' text	Narrative	HIV/Aids	dronabinol or marijuana (high or low dose)	placebo				subjective experience of drug effects	Reported study-by-study without synthesizing results
423																																						Authors' text		HIV/Aids	cannabis	placebo	Peripheral Neuropathic Pain		Reported study-by-study without synthesizing results
423																																						Authors' text	Narrative	HIV/Aids	dronabinol or marijuana (high or low dose)	placebo				Effect on pharmacokinetics of protease inhibitors	Reported study-by-study without synthesizing results
423																																						Authors' text	Narrative	HIV/Aids	dronabinol or marijuana (high or low dose)	placebo				Effect on viral load and CD4 count	Reported study-by-study without synthesizing results
423																																						Authors' text	Narrative	HIV/Aids	dronabinol or marijuana (high or low dose)	placebo				Resting heart rate	Reported study-by-study without synthesizing results
423																																						Authors' text	Narrative	HIV/Aids	Marijuana (high or low dose)	placebo				Skin temperature	Reported study-by-study without synthesizing results
450	Published SR	Arthritis care and research	Fitzcharles, M-A	2016	Canada	N/A	Not reported	we have examined the literature for evidence of effects of cannabinoids as a therapy for patients with rheumatic diseases, including inflammatory arthritis, peripheral osteoarthritis (OA), soft tissue rheumatism, and fibromyalgia (FM).	Soley focused on medical cannabis	Medline, Embase, Embase Classic, BIOSIS Previews, Web of Science, Scopus, CENTRAL, DARE, CINAHL, PsycINFO, AMED	11	Conducted in Sept 2013 and updated in Jan 2015	Randomized controlled trials (RCTs) that assessed at least one outcome of pain, sleep disturbance, and/or quality of life in rheumatic diseases, with comparison of a cannabinoid with placebo or an active control, were included, without limitations for study duration and patients included per treatment arm. Only articles with full text in either English or French were included.	Not reported	Not specifically defined, but authors state: "With use of the herbal [cannabis] product as a means of self-medication by up to 10% of persons with chronic noncancer pain in Canada, pharmaceutical preparations have been developed and are now available for certain indications in some countries"	Introduction	Various types	plant-based and synthetic cannabinoids	placebo or active control	Diseases of the musculoskeletal system and connective tissue			inflammatory arthritis, peripheral osteoarthritis (OA), soft tissue rheumatism, and fibromyalgia (FM).	NR	Not reported	Not reported	N/A	symptoms of rheumatic diseases	Yes	Yes	modified Cochrane RoB	4	201	NR	RCTs or quasi-RCTs	RCTs	Not reported	Authors' text		rheumatoid arthritis	Nabiximols	placebo	Pain		Reported study-by-study without synthesizing results	sleep quality	Reported study-by-study without synthesizing results		This systematic review has revealed a dearth of studies examining the effects of cannabinoids in a small number of patients with rheumatic diseases. Among a vast array of rheumatic conditions, cannabinoid effects have been studied only in RA, FM, and OA, with the latter study prematurely terminated due to lack of efficacy. All studies included in this analysis were assessed as having a high risk …
450																																						Authors' text		rheumatoid arthritis	Nabiximols	placebo				Disease activity score	Reported study-by-study without synthesizing results
450																																						Authors' text		fibromyalgia	Nabilone	placebo	Pain		Reported study-by-study without synthesizing results	QoL	Reported study-by-study without synthesizing results
450																																						Authors' text		fibromyalgia	Nabilone	amitriptyline	Pain		Reported study-by-study without synthesizing results	sleep measures	Reported study-by-study without synthesizing results
450																																						Authors' text		fibromyalgia	Nabilone	amitriptyline				QoL	Reported study-by-study without synthesizing results
502	Published SR	Cochrane Database of Systematic Reviews	Baldinger, R	2012	Switzerland	N/A	Non-profit/academic	To systematically assess the effect of interventions on muscle cramps as a primary or secondary endpoint or adverse event in people with ALS/MND.	Various pharmaceutical interventions (cannabis being one)	Cochrane Neuromuscular Disease Group Specialized Register, Cochrane Central Register of Controlled Trials (CENTRAL), MEDLINE, and EMBASE	4	Cochrane Neuromuscular Disease Group Specialized Register: 14 February 2011, Cochrane Central Register of Controlled Trials (CENTRAL): Issue 1, 2011, MEDLINE: January 1966 to January 2011, EMBASE: January 1980 to January 2011	Types of studies: We included only randomised and quasi-randomised trials. We accepted all study designs. Types of participants: We included studies with participants diagnosed with probable, probable laboratory supported, or definite ALS according to the original (Brooks 1994) or revised El Escorial criteria (Brooks 2000). Types of interventions: We included studies which used oral, subcutaneous…	Protocol completed, and link and/or registration # reported	Not defined	Not defined	Plant-derived cannabinoids (e.g. THC, cannabidiol, THCV, nabiximols (e.g.Sativex))	THC	Not defined	Diseases of the nervous system			Amyotrophic Lateral Sclerosis/ Motor Neuron Disease	outpatients in Switzerland	Not reported	Mixed	N/A	Muscle Cramps	Yes	Yes	Cochrane Handbook for Systematic Reviews of Interventions 5.1.0	1	22	NA	RCTs or quasi-RCTs		Not reported	Range of effects with Cis	1 study	amyotrophic lateral sclerosis/motor neuron disease	THC	Placebo	N/A			Muscle cramp VAS	No statistical difference between groups	Effect size: 0.24 [-0.31, 0.79] - not statistically significant but point measure favors placebo	Twenty studies including 4789 participants were identified. Only one trial, of tetrahydrocannabinol (THC), assessed cramps as the primary endpoint...In all 20 studies no favourable effect for the treatment of cramps in ALS/ MND could be demonstrated, but many studies were underpowered to draw a definite conclusion...There is no evidence to support the use of any intervention for muscle cramps in …
513	Published SR	Cochrane Database of Systematic Reviews	Richards, BL	2012	Australia	NA	Non-profit/academic	The objectives of this systematic review were to evaluate the anal- gesic effectiveness and safety of neuromodulators in patients with RA.	Various pharmaceutical interventions (cannabis being one)	Ovid MEDLINE, EMBASE Classic + EMBASE, The Cochrane Central Register of Controlled Trials and PsycINFO	4	Ovid MEDLINE: 1950 to week 1 November 2010 , EMBASE Classic + EMBASE: Week 44, 2010, The Cochrane Central Register of Controlled Trials (CEN- TRAL): The Cochrane Library 2010, 4th quarter, PsycINFO: 1806 to week 2 November 2010	Types of studies: All published randomised controlled trials (RCTs) or quasi-ran- domised (that is where allocation was not truly random) controlled trials (CCTs) which compared neuromodulator therapy to another therapy (active or placebo, including non-pharmacological thera- pies) for RA were considered for inclusion. Only trials that were published as full articles or were available as a full t…	Protocol completed, and link and/or registration # reported	In the majority of countries, the use of medicinal cannabis is illegal and hence standardised products are not available at all. In Canada, however, four cannabinoid agents are available and include naturally grown cannabis (available under the Medical Marihuana Access Regulations), a cannabis buccal spray (Sativex), nabilone (Cesamet), and dronabinol (Marinol).	Introduction	Plant-derived cannabinoids (e.g. THC, cannabidiol, THCV, nabiximols (e.g.Sativex))		Comparators included: I. placebo; II. other analgesics (e.g. paracetamol, NSAIDs, opioids, tramadol, antidepressants etc); III. non-pharmacological modalities (e.g. transcutaneous electrical nerve stimulation (TENS), acupuncture, etc); IV. same drug at differing doses; V. other neuromodulators.	Diseases of the musculoskeletal system and connective tissue			Rheumatoid Arthritis	Not defined	Adults (18+)	Mixed	NA	Pain	Yes	Yes	Cochrane Risk of Bias Tool	1	58	NA	RCTs or quasi-RCTs	RCTs	Adults (18+)	Range of effects with Cis	Reported in Author's Text - 1 study	Rheumatoid Arthritis	Sativex (2.7 mg Tetrahydrocannabinol (THC) and 2.5 mg cannabidiol (CBD) with each activation (dose))	Placebo	Pain	Movement and Morning Pain	Favours intervention	Sleep Numerical Rating Score (0-10)	Favours intervention	Pain on movement and morning pain were measured using a numerical rating scale (NRS) (0 to 10). After five weeks of treatment there was a statistically significant improvement favouring cannabis over placebo (median difference -0.95, 95% CI -1.83 to -0.02, P = 0.044) // Patients receiving the cannabis based medication had a significant improvement in their quality of sleep when compared to placeb…	Limited data suggest that nefopam, capsaicin and cannabis are all superior to placebo in reducing pain in patients with RA. However each agent is associated with a significant side effect profile that may offset the benefits.... Oro-mucosal cannabis appears to improve pain and sleep to a modest degree but about one in three patients develop side effects involving the central nervous system, indic…
513																																								Rheumatoid Arthritis			Pain	Total Intensity of Pain	No statistical difference between groups			No significant difference was found in total intensity of pain or intensity of ’pain at present’ measurements
513																																								Rheumatoid Arthritis			Pain	Pain at Present	No statistical difference between groups
513																																						Range of effects with Cis	1 study	Rheumatoid Arthritis	Sativex	Placebo				Total adverse events	Favours intervention		Participants receiving cannabis were significantly more likely to suffer an adverse event (risk ratio (RR) 1.82, 95% CI 1.10 to 3.00) corresponding to a NNTH of 3 (95% CI 3 to 13).
513																																						Range of effects with Cis	1 study	Rheumatoid Arthritis	Sativex	Placebo				Withdrawal due to adverse events	Favours control		There were no withdrawals due to adverse events in the cannabis group compared with three (11%) in the placebo arm (RR 0.13, 95% CI 0.01 to 2.39)
																																						Authors' text		Spinal cord injury	THC	placebo		spastic pain	Reported study-by-study without synthesizing results
547	Published SR	British Journal of Clinical Pharmacology	Lynch, M	2011	Canada	NA	Not reported	We therefore conducted an updated systematic review examining RCTs of cannabinoids in the management of chronic pain.	Soley focused on medical cannabis	PubMed, Embase, CINAHL (EBSCO), PsycInfo (EBSCO), The Cochrane Library (Wiley), ISI Web of Science, ABI Inform (Proquest), Dissertation Abstracts (Proquest), Academic Search Premier (EBSCO), Clinical Trials.gov, TrialsCentral.org, OAIster (OCLC) and Google Scholar and individual pharmaceu- tical company trials sites for Eli Lilly and GlaxoSmithKline	13	searches run between Septemeber 7 and October 7, 2010 and not limited by date	Included were RCTs comparing a cannabinoid with a placebo or active control group where the primary outcome was pain in subjects with chronic non-cancer pain. Relevant pain outcomes included any scale measuring pain, for example the numeric rating scale for pain (NRS), visual analogue scale for pain (VAS), the Neuropathy Pain Scale or the McGill Pain Scale. We excluded (i) trials with fewer than …	Not reported	Not Specifically defined: "Cannabinoids represent a relatively new pharmacological option as part of a multi- model treatment plan."	Introduction	Various types	wasn't defined in the methods (except to say "cannabinoids",) but studies included plant-based, extracts and synthetics.	Active Control or placebo	Symptoms, signs and abnormal clinical and laboratory findings, not elsewhere classified			Chronic Pain, Fibromyalgia, HIV, MS, Rheumatoid Arthritis, Brachial Plexus Avulsion, Spinal Cord or Brachial Plexus Injury, Limb Amputation	Not defined	Not reported	Not reported	NA	Pain	Yes	Yes	modified seven point, four item Oxford scale	18	766	NR	RCTs or quasi-RCTs	RCTs	Not reported	Authors' text	Narrative Synthesis - all studies (18)	Various: Chronic Neuropathic Pain, HIV neuropathy, Fibromyalgia, Spasticity related pain, MS, Rheumatoid Arthritis, Brachial Plexus Avulsion, Chronic pain with hyperalgesia or allydonia, Neurogenic symptoms in MS/spinal cord injury/brachial plexus injury/limb amputation	Various: Smoked Cannabis, Oromucosal extracts of cannabis based medicine, Nabilone, Dronabinol, THC-11-oic acid analogue (CT-3 or ajulemic acid)	Placebo	Other (specify in AZ)	Various: Central Neuropathic pain, Neuropathic Pain, Fibromyalgia, Spasticity related pain, Allydonia, Hyperalgesia, Sensory Neuropathy	Favours intervention	Sleep	Favours intervention	The majority (15 trials) demonstrated a sig- nificant analgesic effect for the cannabinoid agent being investigated. Several trials also noted significant improve- ments in sleep [21–24].	In conclusion this systematic review of 18 recent good quality randomized trials demonstrates that cannabinoids are a modestly effective and safe treatment option for chronic non-cancer (predominantly neuropathic) pain. Given the prevalence of chronic pain, its impact on func- tion and the paucity of effective therapeutic interventions, additional treatment options are urgently needed. More large…
547																																						Authors' text	Narrative Synthesis - 4 studies	HIV Neuropathy	Smoked Cannabis	Placebo	Neuropathy		Favours intervention			All examined populations with neu- ropathic pain and two involved neuropathic pain in HIV neuropathy [21, 25–27]. All four trials found a positive effect with no serious adverse effects.
547																																						Authors' text	Narrative Synthesis - 7 studies	Neuropathic Pain, Rheumatoid arthritis, and Mixed group of people with chronic pain	Oromucosal extracts of cannabis based medicine (CBM)	Placebo	Other (specify in AZ)	Neuropathic Pain, Rheumatoid Arthritis, and unclear	Favours intervention	Rheumatoid Arthritis Disease Activity	Favours intervention	Five examined participants with neuropathic pain, one rheumatoid arthritis and one a mixed group of people with chronic pain, many of whom had neuropathic pain. Six of the seven trials demonstrated a positive analgesic effect. Of note in the one trial examining pain in rheuma- toid arthritis, the CBM was associated with a significant decrease in disease activity as measured by the 28 joint diseas…
547																																						Authors' text	Narrative Synthesis - 3 studies	Spinal Pain, Fibromyalgia and Spasticity Related Pain	Nabilone	Placebo	Other (specify in AZ)	Spinal Pain, Fibromyalgia and Spasticity Related Pain	Favours intervention			Three of these trials were placebo controlled and found a signifi- cant analgesic effect in spinal pain [34], fibromylagia [32] and spasticity related pain [33].
547																																						Authors' text	1 study	Neuropathic Pain	Nabilone	Dihydrocodeine	Neuropathic Pain		Reported study-by-study without synthesizing results			The fourth compared a daily dose of nabilone 2 mg with dihydrocodeine 240 mg in neuropathic pain. Mean baseline pain was 69.6 mm on the 100 mm VAS and dropped to 59.93 mm for partici- pants taking nabilone and 58.58mm for those taking dihydrocodeine [31].
547																																						Authors' text	Narrative Synthesis - 2 studies	MS and spasticity related pain	CBMs or nabilone	Placebo				Barthel index for activities of daily living (ADL)	Favours control	Two studies included the Barthel index for activities of daily living (ADL) [28, 33] and noted no significant improvement in ADLs with nabilone for spasticity related pain [33] or with CBMs for multiple sclerosis [28].
547																																						Authors' text	1 study	MS	Dronabinol	Placebo	Other (specify in AZ)	Central Pain	Reported study-by-study without synthesizing results			The earlier trial found that dronabinol 10 mg day-1 led to significant reduc- tion in central pain in multiple sclerosis [35],
547																																						Authors' text	1 study	Mixed diagnoses for chronic pain	Dronabinol	Placebo	Analgesia		Reported study-by-study without synthesizing results			a subsequent trial found that dronabinol at both 10 and 20 mg day-1 led to significantly greater analgesia and better relief than placebo as adjuvant treatment for a group of participants with mixed diagnoses of chronic pain on opioid therapy [36].
547																																						Authors' text	1 study	neuropathic pain with hyperalgesia or allodynia	ajulemic acid	placebo	Other (specify in AZ)	neuropathic pain with hyperalgesia or allodynia	Reported study-by-study without synthesizing results			It was found that ajulemic acid led to significant improvement in pain intensity at 3 h but no difference at 8 h as compared with placebo.
547																																						Authors' text	1 study	Fibromyalgia	Nabilone	placebo				FIQ	Reported study-by-study without synthesizing results	In one trial examining nabilone for the treatment of fibromyalgia the FIQ [39] demon- strated significant improvement as compared with placebo.
568	Published SR	PLoS ONE	Phillips, T	2010	UK	NA	Non-profit/academic	we have conducted a systematic review and meta-analysis to elucidate the evidence base for pharmacological management of neuropathic pain in HIV-SN.	Various pharmaceutical interventions (cannabis being one)	Medline (from 1966 to date searched), The Cochrane central register of controlled trials (Cochrane Library 2010, Issue 2), www.clinicaltrials.gov (a US registry of clinical trials) and www.controlled-trials.com (a meta-registry of controlled trials)	4	20 June 2008, and a follow-up search on 22 February 2010	we sought to identify RCTs that included patients with painful HIV-SN and reported at least one clinically relevant pain outcome measure. We excluded animal studies, reviews, letters, abstract-only trials, open-label trials, and trials that were not randomised... Where possible, dichotomous pain improvement outcome data were extracted from RCTs that reported efficacy superior to placebo. Intentio…	Protocol mentioned, but no link or registration # reported	Not defined	Not defined	Plant-based materials (e.g. marijuana, hashish)		NR in methods - Placebo or Active Control (from results)	Certain infectious and parasitic diseases			HIV Sensory Neuropathy	Not Defined	Not reported	Not reported	NA	Neuropathic Pain	Yes	No	7-point modified ‘‘Jadad’’ scoring system	2	111	55-56	RCTs or quasi-RCTs	N/A	Not reported	Meta-analysis	2 studies	HIV SN	Smoked Cannabis	Placebo	Neuropathic Pain		Favours intervention			Using the ITT analysis dichotomous VAS data from both trials, an NNT for smoked cannabis was calculated as 3.38 95%CI (2.19 to 7.50) (Table 3)	On the basis of current published evidence, topical capsaicin 8%, smoked cannabis and Nerve Growth Factor have evidence of efficacy in pain associated with HIV-SN. However this is potentially contentious, as a recent larger RCT, currently reported in abstract form only, has suggested this treatment is not superior to placebo [45]. Some commonly recommended analgesics, including opioids, have not …
573	Published SR	Cochrane Database of Systematic Review	Phillips, RS	2010	UK	N/A	Non-profit/academic	• To assess the effectiveness of pharmacological interventions in controlling anticipatory nausea and vomiting in children and young people (aged < 18 years) about to receive chemotherapy. • To assess the effectiveness of pharmacological interventions in controlling acute and delayed nausea and vomiting in children and young people (aged < 18 years) receiving chemotherapy. • To determine the asso…	Various pharmaceutical interventions (cannabis being one)	CENTRAL, EMBASE, MEDLINE, MEDLINE IN PROCESS, LILACS, PsycInfo, ASCO, SIOP, MASCC, ISI Sci and Tech proceedings, ICRP, National Cancer Institute Clinical Trials PDQ, NCRI, mRCT register, clinicaltrials.gov, Centrewatch	16	inception to Feb or Mar 2008	randomised controlled trials (RCTs) that compared a pharmacological antiemetic, cannabinoid or benzodiazepine with placebo or any alternative active intervention in children and young people (< 18 years) with a diagnosis of cancer who were to receive chemotherapy.	Protocol mentioned, but no link or registration # reported	Not defined	Not defined	Various types	Cannabinoids - not defined	placebo or other active comparator	Neoplasms			Cancer	NR	Children (0-17)	Mixed	Children	Nausea and vomiting due to chemotherapy	Yes	Yes	Cochrane RoB	4	NR	N/A	RCTs or quasi-RCTs	RCTs	Children (0-17)	Authors' text	1 study	Cancer	tetrahydrocannabinol	prochlorperazine and metoclopramide				nausea and vomiting control	Reported study-by-study without synthesizing results		Our overall picture of which are the most effective antiemetics to prevent chemotherapy induced nausea and vomiting in childhood is incomplete and imprecise. Cannabinoids are probably effective, but produce high levels of side effects, which may be experienced as adverse by some patients, but not by others. We cannot clearly define a route, schedule or dose of maximal efficiency of any antiemetic…
573																																						Authors' text	1 study	Cancer	Nabilone	Domperidone				nausea	Reported study-by-study without synthesizing results
573																																						Authors' text	1 study	Cancer	tetrahydrocannabinol	prochlorperazine				vomiting	Reported study-by-study without synthesizing results
593	Published SR	Brain Injury	Meyer, MJ	2010	Canada	N/A	Not reported	To review the research literature on pharmacological interventions used in the acute phase of acquired brain injury (ABI) to manage ICP and improve neural recovery.	Various pharmaceutical interventions (cannabis being one)	CINAHL, EMBASE, MEDLINE and PSYCHINFO	4	1980–2008	pharmacological interventions commonly used in acute ABI management. Interventions used to lower elevated intracranial pressure (ICP) and/or preserve neural functioning in the acute stages following an acquired brain injury (ABI) were considered. Interventions reported as standard practice or indicated as having potential future benefits were selected for review; the Toronto Acquired Brain Injury…	Not reported	Not defined	Not defined	Synthetic cannabinoid (e.g. nabilone, dronabinol)	Not defined in the methods	NR	Injury, poisoning and certain other consequences of external causes			acquired brain injury	NR	Not reported	Not reported	N/A	Treatment: intracranial pressure (ICP) and improve neural recovery	No	No	PEDro and Downs and Black	2	928	NR	RCTs or quasi-RCTs	RCTs	Not reported	Authors' text	2 studies: authors provide conclusions based on study-by-study data	Acquired brain injury	Dexanabinol	placebo				Itercranial pressure (ICP)	Reported study-by-study without synthesizing results	"Therefore, there was level 1 evidence that dexanabinol does not result in acute improvement in ICP or benefits in long-term outcomes"	"Finally, despite initial promise, larger studies suggest cannabinoids are not effective in reducing ICP or improving outcomes post-ABI...Substantial research has been devoted to evaluating the use of pharmacological interventions in the acute management of ABI. Based on the results of this review, corticosteroids were found to be contraindicated and cannabinoids were reported as ineffective. The…
593																																						Authors' text		Acquired brain injury	Dexanabinol	placebo				Glasgow-outcome scale and Disability rating scale	Reported study-by-study without synthesizing results
593																																						Authors' text		Acquired brain injury	Dexanabinol	placebo				Mortality rates	Reported study-by-study without synthesizing results
593																																						Authors' text		Acquired brain injury	Dexanabinol	placebo				Bathel index	Reported study-by-study without synthesizing results
593																																						Authors' text		Acquired brain injury	Dexanabinol	placebo				QoL measures	Reported study-by-study without synthesizing results
607	Published SR	BMC Neurology	Lakhan, S	2009	USA	NA	Not reported	A systematic evaluation of recent research had not previously been conducted, and was needed in order to provide organized evidence of cannabinoid treatments and direction for future clinical stud- ies. We therefore systematically reviewed studies that used a combination extract of THC and CBD for the treatment of spasticity	Soley focused on medical cannabis	MEDLINE/ PubMed, Ovid, and CENTRAL (Cochrane Central Register of Controlled Trials)	3	1999 to April 2009	Only randomized, placebo-controlled, human studies of shorter treatment periods (under 6 months) were included... only studies with Jadad scores of 4 or higher were considered for inclusion. Relevant trials included those that had administered a combination THC and CBD extract, those in which clini- cally stable spasticity had been established prior to trial and those that reported objective meas…	Not reported	Not defined	Not defined	Plant-derived cannabinoids (e.g. THC, cannabidiol, THCV, nabiximols (e.g.Sativex))	Whole plant cannabis extracts; combination THC and CBD extract	Placebo or active control	Diseases of the nervous system			MS	Not defined explicitly - but clinical	Not reported	Not reported	N/A	Spasticity	No	No	Jadad scores	6	820	NR	RCTs or quasi-RCTs	N/A	Not reported	Authors' text	Narrative Synthesis: 6 studies	MS	THC+CBD	Unclear - states all trials were placebo controlled but some also studied THC+CBD vs THC	N/A	N/A	N/A	Spasticity	Favours intervention	Five studies [16-20] concluded that cannabis extract may decrease spasticity and improve mobility in patients with MS. One study [15] reported no reduction in spasticity.	We found evidence that combined extracts of THC and CBD may reduce symptoms of spasticity in patients with MS. Although the subjective experience of symptom reduction was generally found to be significant, objective measures of spasticity failed to provide significant changes. In a previous study of spasticity-related pain, MS patients also reported a subjective perception of symptom reduction wi…
607																																						Authors' text	Narrative Synthesis: 5 studies	MS	THC+CBD	Unclear - states all trials were placebo controlled but some also studied THC+CBD vs THC	N/A	N/A	N/A	Mobility	Favours intervention	See comment above
607																																						Authors' text	Narrative Synthesis: 3 studies	MS	THC+CBD	THC	N/A	N/A	N/A	Efficacy	No statistical difference between groups	In all three comparison studies, there was no distinction in effi- cacy between THC extracts and combined THC and CBD extracts.
607																																						Authors' text	Narrative Synthesis: 6 studies	MS	THC+CBD	Unclear - states all trials were placebo controlled but some also studied THC+CBD vs THC	N/A	N/A	N/A	Ashworth Score	No statistical difference between groups	In one study [18], 50 patients were assessed with the Ash- worth scale for muscle tone and showed significant improvement during the active treatment trial. The other five studies reported little to no improvement in their ver- sions of the Ashworth scale.
607																																						Authors' text	Narrative synthesis - 3 studies	MS	THC:CBD	Placebo				Spasticity (VAS Scores)	Favours intervention	Two studies reported that patients on active treatment showed a significant improvement in VAS scores [17,19], and one reported no significant difference [15].
607																																						Authors' text	Narrative Synthesis: 2 studies	MS	THC + CBD	Unclear - states all trials were placebo controlled but some also studied THC+CBD vs THC	N/A	N/A	N/A	Walk Time	No statistical difference between groups	only two studies [16,19] reported data from 160 patients with MS. Although both showed a trend for improvement in walk time, P-value did not reach statistical significance in one study [19] and was not reported in the other [16].
607																																						Authors' text	Narrative Synthesis: 3 studies	MS	THC + CBD	Unclear - states all trials were placebo controlled but some also studied THC+CBD vs THC	N/A	N/A	N/A	RMI Score	No statistical difference between groups	Three studies [16-18] reported RMI scores for 275 MS patients. Although there was a trend for improvement from baseline to study completion, mean changes in assessment were significant in one study [18] and insignificant in the other two studies.
607																																						Authors' text	Narrative Synthesis: 6 studies	MS	THC + CBD	Unclear - states all trials were placebo controlled but some also studied THC+CBD vs THC	N/A	N/A	N/A	Spasticity (subjectively rated by patients)	Favours intervention	Five studies [16-20] reported sig- nificant improvements in spasticity as subjectively rated by patients with MS and one reported deterioration [15].
612	Published SR	Cochrane Database of Systematic Reviews	Curtis, A	2009	UK	N/A	Government	To evaluate the efficacy and safety of cannabinoids compared with placebo or other drugs in treating tics and obsessive compulsive symptoms in patients with Gilles de la Tourette Syndrome (GTS).	Soley focused on medical cannabis	Cochrane Central Register of Controlled Trials (CENTRAL) (in The Cochrane Library), MEDLINE, EMBASE, PsycINFO, CINAHL, AMED, British Nursing Index and DH DATA	8	MEDLINE: January 1996 to date, EMBASE: January 1974 to date, PsycINFO: January 1887 to date, CINAHL: January 1982 to date, AMED: January 1985 to date, British Nursing Index: January 1994 to date and DH DATA: January 1994 to date	Types of studies: We included all randomised controlled trials comparing any cannabinoid preparation with placebo or other drug(s) used in the treatment of tics and obsessive compulsive symptoms in patients with GTS. We also considered quasi-randomised trials. We excluded controlled clinical trials and observational studies. Types of participants : Patients diagnosed clinically with GTS. Types of…	Protocol completed, and link and/or registration # reported	Not specifically defined - "Smoking has been the route of administration for many cannabis users. This is not a viable op- tion when using cannabis therapeutically, owing to the potential for long-term adverse effects from smoke inhalation. Oral preparations such as nabilone, a synthetic cannabinoid, and dronabi- nol have been used."	Introduction	Plant-derived cannabinoids (e.g. THC, cannabidiol, THCV, nabiximols (e.g.Sativex))	any cannabinoid preparation	Placebo or any other drug(s) for tic reduction and/or reduction of obsessive compulsive symptoms	Mental and behavioural disorders			Gilles de la Tourette Syndrome (GTS)	Not defined	Not reported	Mixed	N/A	tics and obsessive compulsive symptoms	Yes	Yes	CONSORT checklist	2	28	N/A	RCTs or quasi-RCTs	N/A	Adults (18+)	Authors' text	Narrative Synthesis found in Discussion - 2 studies	Tourette's	THC	Placebo				Tic Reduction	Favours intervention	The positive finding was that in both studies, THC was associated with tic reduction	It is possible that cannabinoid medication has a beneficial effect which is too weak to be detected using ITT and such a small sample size. There is some weak evidence that cannabinoid medication may have an effect on obsessive compulsive behaviour but the measure used was an addition to the TSSL which has not been validated. There were no data on the effect of THC on quality of life.Implications…
612																																						Authors' text	1 study	Tourette's	THC	Placebo				Tic Severity (TSGS)	Reported study-by-study without synthesizing results	Tic severity scores demonstrated a greater reduction after 9 THC than after placebo but the difference was not statistically signif- icant (p = 0.132).
612																																						Authors' text	1 study	Tourette's	THC	Placebo				Tic Severity - Complex Motor Tics (TSGS)	Reported study-by-study without synthesizing results	Further analysis of subscores found a signifi- cant improvement in scores for complex motor tics (CMT) (p = 0.015).
612																																						Authors' text	1 study	Tourette's	THC	Placebo				Shapiro Tourette Syndrome Severity Scale (STSSS)	Reported study-by-study without synthesizing results	STSS No significant difference was found between placebo and 9 THC.
612																																						Authors' text	1 study	Tourette's	THC	Placebo				Yale Global Tic Severity Scale (YGTSS)	Reported study-by-study without synthesizing results	YGTSS No significant difference was found between placebo and 9 THC.
612																																						Authors' text	1 study	Tourette's	THC	Placebo				Tourette’s Syndrome Symptom List (TSSL) - Patient rated	Reported study-by-study without synthesizing results	TSSL The authors reported a significant reduction in tics after treatment with 9 THC compared with placebo (p = 0.015).
612																																						Authors' text	1 study	Tourette's	THC	Placebo				Obsessive Compulsive Disorder (TSSL - patient rated)	Reported study-by-study without synthesizing results	The authors added some additional ratings to the TSSL and using these non-validated additional ratings they reported a significant difference in OCB (p = 0.041).
612																																						Authors' text	1 study	Tourette's	THC	Placebo				Tourette Syndrome Clinical Global Impressions scale (TS-CGI)	Reported study-by-study without synthesizing results	The authors reported significant differences between the 9 THC and placebo groups on the two visits when the patients were taking the maximum dose (p = 0.05 and p = 0.008, respectively).
612																																						Authors' text	1 study	Tourette's	THC	Placebo				Shapiro Tourette Syndrome Severity Scale (STSSS)	Reported study-by-study without synthesizing results	STSS The authors reported a significant difference on the visit when the patients were taking the maximum dose (p = 0.033).
612																																						Authors' text	1 study	Tourette's	THC	Placebo				Yale Global Tic Severity Scale (YGTSS)	Reported study-by-study without synthesizing results	YGTSS No significant difference was found but a trend in favour of was reported (p = 0.06). Analysis of a subscore “motor global scale” found a significant difference at maximum 9THC dose (p = 0.04).
612																																						Authors' text	1 study	Tourette's	THC	Placebo				Video Rating	Reported study-by-study without synthesizing results	Video rating A significant difference was found between the scores for the treat- ment group and the placebo group on the visit when the patients were taking the maximum dose (p = 0.030).
612																																						Authors' text	1 study	Tourette's	THC	Placebo				Tourette’s Syndrome Symptom List (TSSL) - Patient rated	Reported study-by-study without synthesizing results	TSSL On 10 different treatment days a significant difference was found between the treatment and placebo groups (p <0.05).
612																																						Authors' text	1 study	Tourette's	THC	Placebo				Tourette Syndrome Clinical Global Impressions scale (TS-CGI)	Reported study-by-study without synthesizing results	Using the Bonferroni adjustment, the authors reported one sig- nificant group difference using the TS-CGI on the visit when the patients were taking maximum dose (p = 0.008).
615	Published SR	Pain Medicine	Martín-Sánchez, E	2009	Spain	NA	Government	In the light of the present dearth of solid evidence on cannabis for treatment of chronic pain and the considerable controversy and media pressure surrounding the positive effects of this substance, we decided to undertake this systematic review and meta-analysis based on randomized controlled studies on the topic, with efficacy indicators interpretable from the standpoint of daily clinical pract…	Soley focused on medical cannabis	Medline/ Pubmed, Embase, and The Cochrane Controlled Trials Register (TRIALS CENTRAL)	3	until February 2008	The studies selected were double-blind, random- ized controlled trials having a crossover or parallel design. In the intervention group, subjects were required to have received any cannabis prepara- tion, which at minimum contained the canna- binoid, delta-9-tetrahydrocannabinol (THC), applied by any route of administration. Studies were included that used the extract of the complete plant or the…	Not reported	Not specifically defined: they state, "The use of this plant in traditional medicine has been documented in a range of countries, extending from China to the rest of the world, for the treatment, among other things, of strained muscles, convulsions, asthma, depression, pain [2], nausea, and vomiting [3,4] or as an appetite stimulant [5,6]. At present, the possible medical applications of the plan…	Introduction	Various types	any cannabis preparation, which at minimum contained the cannabinoid, delta-9-tetrahydrocannabinol (THC); alone or combined with other cannabinoids such as cannabidiol. Synthetic derivates of THC, such as dronabinol, nabilone, or benzopyra- noperidine, a synthetic nitrogen analog of THC, were likewise included	Placebo	Symptoms, signs and abnormal clinical and laboratory findings, not elsewhere classified			Chronic Pain	Clinical	Not reported	Not reported	N/A	Chronic pain	Yes	No	Jadad scale [14]— Oxford quality scoring system—and particularly by reference to the principal biases that affect clinical trials involving health interventions, namely, selection bias, performance bias, and attrition bias.	18	809	NR	RCTs or quasi-RCTs		Adults (18+)	Meta-analysis	SMD for a fixed- effects model - 7 studies	Various: cancer, Several pathologies, MS, Chronic upper motor neuron syndrome	THC, GW-1000-02 (THC/CBD), NIB, CBD, Nabilone	Placebo	Pain	NA	Favours intervention			Measured in terms of the change from the baseline intensity of pain, registered an SMD for a fixed- effects model of -0.61 (-0.84 to -0.37), using an intra-subject correlation coefficient of r = 0.3 in the crossover studies.	In conclusion, currently available evidence indi- cates that treatment of chronic pain based on can- nabinoid compounds would entail more risk than benefit, including the risk of the appearance of events in which the pain—if it is of low intensity— might even come to pose a secondary problem in the subject. Nevertheless, the antinociceptive effects of this substance constitute an open avenue for …
615																																						Meta-analysis	4 studies	Various: cancer,MS, fibromyalgia	THC, Dronabinol, GW-1000-02 (THC/CBD), Nabilone	Placebo				Euphoria	Favours intervention
615																																						Meta-analysis	4 studies	Various: cancer, MS, fibromyalgia, brachial plexus avulsion	THC, GW-1000-02 (THC/CBD), GW-2000-02 (THC), Nabilone	Placebo				Dysphoria	No statistical difference between groups
615																																						Meta-analysis	9 studies	Various: Peripheral nerve lesion, cancer, Rheumatoid Arthritis, Fibromyalgia, MS	THC, Dronabinol, GW-1000-02, Nabilone, GW-2000, plant extract (2.5 mg THC, CBD and other cannabinoids)	Placebo				Events linked to alterations in perception (blurred vision, visual hallucinations, tinnitus, disorientation, confusion, dissociation, acute psychosis)	Favours intervention	Events linked to alterations in perception (blurred vision, visual hallucinations, tinnitus, dis-orientation, confusion, dissociation, acute psychosis)isplayed a risk, for cannabis groups of 4.51 (3.05–6.66), with I2 = 2.8%; P = 0.42; NNH: 7 (6–9) (Figure 4).
615																																						Meta-analysis	8 studies	Various: Cancer, MS, Fibromyalgia, Peripheral Nerve Lesion, Chronic Upper Motor Neuron Syndrome	THC, Dronabinol, Nabilone, GW-1000-02, GW-2000, plant extract (2.5 mg THC, CBD and other cannabinoids)	Placebo				Events affecting motor function (speech disorders, ataxia, muscle twitching, numbness)	Favours intervention	For events affecting motor function (speech disorders, ataxia, muscle twitching, numbness), the risk for the intervention groups was 3.93 (2.83– 5.47), with I2 = 0%; P = 0.68; NNH: 5 (4–6) (Figure 5).
615																																						Meta-analysis	5 studies	Various: Cancer, Peripheral Nerve Lesion, MS, Fibromyalgia	THC, GW-1000-02, Nabilone	Placebo				Events that altered cognitive function (impaired memory, disturbance in attention, dis- connected thought)	Favours intervention	Events affecting motor function (speech disorders, ataxia, muscle twitching, numbness) in these same intervention groups, the respective figures were: 4.46 (2.37– 8.37), with I2 = 0%; P = 0.99; NNH: 8 (6–12) (Figure 6).
630	Published SR	Cochrane Database of Systematic Reviews	Krishnan, S	2009	UK	N/A	Not reported	To determine from available research whether cannabinoids are clinically effective in the treatment of dementia.	Soley focused on medical cannabis	Cochrane Library, MEDLINE, EMBASE, PsycINFO, CINAHL and LILACS, ISTP, INSIDE, Index to Theses, Australian Digital Theses Program, Canadian Theses and Dissertations, DATAD, Dissertation Abstract Online (USA), National Research Register, ReFeR, mRCT, ISRCTN Register, Action medical research, Kings College London, Laxdale Ltd., Medical Research Council (UK), NHS Trusts Clinical Trials Register, Nati…	30	Dec 2005 - Apr 2008	All double-blind and single (rater)-blind randomized placebo controlled trials assessing the efficacy of cannabinoids at any dose in the treatment of people with dementia.	Protocol mentioned, but no link or registration # reported	Not defined	Not defined	Various types	Cannabinoids: not specifically, although mention THC, CBD	placebo	Mental and behavioural disorders			Dementia	NR	Adults (18+)	Mixed	N/A	treatment for dementia	Yes	No	Cochrane RoB	1	15	N/A	RCTs or quasi-RCTs	RCTs	Adults (18+)	Authors' text	1 study	Alzheimer’s disease	dronabinol	placebo				body weight and triceps skin fold (measures of anorexia)	Reported study-by-study without synthesizing results		The only included study concluded that the cannabinoid dronabinol may be useful in the treatment of anorexia and to improve disturbed behaviour in people with Alzheimer’s disease. However the lack of quantitative data and the unclear risk of bias in key domains of this study means that no useful conclusions can be drawn in this review. At present this review finds no evidence that cannabinoids ar…
630																																						Authors' text	1 study	Alzheimer’s disease	dronabinol	placebo				disturbed behaviour	Reported study-by-study without synthesizing results
630																																						Authors' text	1 study	Alzheimer’s disease	dronabinol	placebo				affect	Reported study-by-study without synthesizing results
662	Published SR	European Journal of Cancer Care	Machado Rocha, F	2008	Brazil	N/A	Not reported	This review aims to evaluate, through a systematic literature review, interventions using C. sativa in the treatment of nausea and vomiting in patients with any type of cancer receiving chemotherapy, tested in randomized clinical trials and compared with any type of control group.	Soley focused on medical cannabis	MEDLINE (PUBMED), EMBASE, PSYCINFO, LILACS and ‘The Cochrane Collaboration Controlled Trials Register’.	5	initial period of the databases until December 2006	Type of study: All randomized clinical trials about the subject published in the literature were objects for this study. Type of Participants: People with any type of cancer receiv- ing chemotherapeutic treatment, irrespective of gender, age and place of treatment. The chemotherapeutic schemes included those of low, moderate and high emetic potential. Type of intervention: Pharmacological interve…	Not reported	Not specifically defined - they state: "Although marijuana has not returned to the American pharmacopoeia, in 1986 the Food and Drug Administration authorised the use of its active element, delta-9- tetrahydrocannabinol (THC), for medical purposes (Walsh et al. 2003) to treat nausea and vomiting side effects in patients receiving chemotherapy"	Introduction	Various types	substances derived from C. sativa and/or smoked cannabis	any type of control group.	Neoplasms			Any type of Cancer	Clinical	Mixed (adults and children)	Mixed	N/A	Chemotherapy induced nausea and vomiting	No	No	the criteria used were those described by Mulrow and Oxman (1997) and the Jadad Scale (Jadad et al. 1996).	30	NR	NR	RCTs or quasi-RCTs	N/A	Mixed (adults and children)	Meta-analysis	2 studies	Cancer - chemotherapy induced nausea and vomiting	Dronabinol	Placebo				Anti-emetic efficacy	No statistical difference between groups	In terms of anti-emetic efficacy, there was not a statisti- cally significant difference in favour of dronabinol [n = 185; relative risk (RR) = 0.47; confidence interval (CI) = 0.19–1.16; P = 0.10].	(1) The cannabinoid dronabinol had an anti-emetic effi- cacy superior to neuroleptics for cancer patients receiv- ing chemotherapy. (2) Although there was not a statistically significant dif- ference between the cannabinoid dronabinol and placebo for cancer patients receiving chemotherapy, a clinically significant difference in favour of dronabinol was observed. (3) Although there was not a stati…
662																																						Meta-analysis	5 studies	Cancer - chemotherapy induced nausea and vomiting	Dronabinol	Prochlorperazine				Anti-emetic efficacy	Favours intervention	In terms of anti-emetic efficacy, there was a statistically significant difference in favour of dronabinol [n = 325; RR = 0.67; CI = 0.47–0.96; P = 0.03; number needed to treat (NNT) = 3.4].
662																																						Meta-analysis	6 Studies	Cancer - chemotherapy induced nausea and vomiting	Nabilone	Prochlorperazine, Alizapride, Domperidone				Anti-emetic efficacy	No statistical difference between groups	In terms of anti-emetic efficacy, there was not a statisti- cally significant difference in favour of nabilone (n = 277; RR = 0.88; CI = 0.72–1.08; P = 0.21).
662																																						Meta-analysis	2 studies	Cancer - chemotherapy induced nausea and vomiting	levonantradol	Prochlorperazine, Chlorpromazine				Anti-emetic efficacy	No statistical difference between groups	two studies. One of them allowed three comparisons: three different doses of levonantradol (0.5 mg, 0.75 mg and 1.0 mg) were compared with a neuroleptic (Hutcheon et al. 1983). In terms of anti-emetic efficacy, there was not a statistically significant difference in favour of levonantradol (n = 194; RR = 0.94; CI = 0.75–1.18; P = 0.60).
662																																						Meta-analysis	18 studies	Cancer - chemotherapy induced nausea and vomiting	Nabilone, Dronabinol, Levonantradol	Prochlorperazine, Haloperidol, Chlorpromazine, Metoclopramide, Domperidone, Alizapride, Placebo				Preference for Drug	Favours intervention	comprised 18 studies. In terms of preference for one of the drugs, there was a statistically significant difference in favour of the Can- nabis components (n = 1138; RR = 0.33; CI = 0.24–0.44; P < 0.00001; NNT = 1.8).
664	Published SR	CMAJ	Wang, T	2008	Canada	NA	Government	To create a database of known adverse events related to the medical use of cannabis to inform physicians, policy- makers and the public. In addition, we sought to critically evaluate the quality of published studies to guide future stud- ies on the safety of medical cannabis use.	Soley focused on medical cannabis	Ovid MEDLINE, PsycINFO and EMBASE	3	Ovid MEDLINE: January 1966 to week 5 of October 2007, PsycINFO: January 1967 to week 5 of October 2007 and EMBASE: January 1980 to week 42 of 2007	We included randomized controlled trials evaluating the safety and efficacy of cannabis if adverse events were quan- tified. We included observational studies in which cannabis represented the main exposure, provided the outcome of in- terest was adverse events. We included case reports if they de- scribed adverse events in people exposed to cannabis. We excluded studies that focused on adverse e…	Not reported	In addition to the use of prescription cannabinoids, the medical use of smoked herbal cannabis is substantial: an estimated 10%–20% of patients with multiple sclerosis, chronic noncancer pain, HIV/AIDS and epilepsy report smoking cannabis for therapeutic purposes.	Introduction	Various types	Unclear, they report Cannabis as the intervention, in search strategy thye state they included cannabinoids and plant based materials - they excluded synthetic cannabinoids	NR	Neoplasms	Diseases of the nervous system	Symptoms, signs and abnormal clinical and laboratory findings, not elsewhere classified	N/A tracking adverse events	Not defined	Not reported	Not reported	NA	N/A tracking adverse events linked to medical cannabis	Yes	No	Jadad and the Downs and Black checklist	31	2698	NR	Various (specify in column Ak)	23 RCTs, 8 observational	Adults (18+)	Meta-analysis		cancer or multiple sclerosis, RA, Glaucoma, Brachial Plexus Avulsion, Neuropathic Pain, Postoperative Pain, Cancer-related anorexia–cachexia syndrome, HIV wasting Syndrome, Idiopathic Parkinson disease, Healthy, cannabis-naïve volunteers	Oral Δ-9-tetrahydrocannabinol or Δ-9- tetrahydrocannabinol–cannabidiol (15 trials) and oromu- cosal Δ-9-tetrahydrocannabinol–cannabidiol (8 trials)	placebo or standard care				Serious Adverse Events	No statistical difference between groups	no evidence of a higher incidence of serious adverse events following medical cannabis use compared with control (rate ratio [RR] 1.04, 95% CI 0.78–1.39)	We found that the rate of nonserious adverse events was 1.86 times higher among medical cannabinoid users than among controls. However, we did not find a higher inci- dence rate of serious adverse events associated with medical cannabinoid use. The fact that 99% of the serious adverse events from randomized controlled trials were reported in only 2 trials suggests that more studies with long-term…
664																																						Meta-analysis		cancer or multiple sclerosis, RA, Glaucoma, Brachial Plexus Avulsion, Neuropathic Pain, Postoperative Pain, Cancer-related anorexia–cachexia syndrome, HIV wasting Syndrome, Idiopathic Parkinson disease, Healthy, cannabis-naïve volunteers	Oral Δ-9-tetrahydrocannabinol or Δ-9- tetrahydrocannabinol–cannabidiol (15 trials) and oromu- cosal Δ-9-tetrahydrocannabinol–cannabidiol (8 trials)	placebo or standard care				Death Rate	No statistical difference between groups	The difference in death rate between these 2 groups was not statistically significant (RR 2.66, 95% CI 0.77–9.28).
664																																						Meta-analysis		cancer or multiple sclerosis, RA, Glaucoma, Brachial Plexus Avulsion, Neuropathic Pain, Postoperative Pain, Cancer-related anorexia–cachexia syndrome, HIV wasting Syndrome, Idiopathic Parkinson disease, Healthy, cannabis-naïve volunteers	Oral Δ-9-tetrahydrocannabinol or Δ-9- tetrahydrocannabinol–cannabidiol (15 trials) and oromu- cosal Δ-9-tetrahydrocannabinol–cannabidiol (8 trials)	placebo or standard care				Rate of Non-serious Adverse Events	Favours intervention	The incidence rate of nonserious adverse events was significantly higher among subjects assigned to cannabinoid therapy than among controls (RR 1.86, 95% CI 1.57–2.21)
664																																						Meta-analysis	Subgroup analysis by drug	cancer or multiple sclerosis, RA, Glaucoma, Brachial Plexus Avulsion, Neuropathic Pain, Postoperative Pain, Cancer-related anorexia–cachexia syndrome, HIV wasting Syndrome, Idiopathic Parkinson disease, Healthy, cannabis-naïve volunteers	oromucosal Δ-9- tetrahydrocannabinol–cannabidiol	placebo or standard care				Average rate of Non-serious Adverse Events	Favours intervention	The average rate of nonserious adverse events was signifi- cantly higher among people receiving oromucosal Δ-9- tetrahydrocannabinol–cannabidiol (RR 1.88, 95% CI 1.48– 2.39) or oral Δ-9-tetrahydrocannabinol (RR 2.18, 95% CI 1.59–2.99) than among controls;
664																																						Meta-analysis	Subgroup analysis by drug	cancer or multiple sclerosis, RA, Glaucoma, Brachial Plexus Avulsion, Neuropathic Pain, Postoperative Pain, Cancer-related anorexia–cachexia syndrome, HIV wasting Syndrome, Idiopathic Parkinson disease, Healthy, cannabis-naïve volunteers	oral Δ-9-tetrahydrocannabinol	placebo or standard care				Average rate of Non-serious Adverse Events	Favours intervention	^^
664																																						Meta-analysis	Subgroup analysis by drug	cancer or multiple sclerosis, RA, Glaucoma, Brachial Plexus Avulsion, Neuropathic Pain, Postoperative Pain, Cancer-related anorexia–cachexia syndrome, HIV wasting Syndrome, Idiopathic Parkinson disease, Healthy, cannabis-naïve volunteers	oral Δ-9-tetrahydrocannabinol–cannabidiol	placebo or standard care				Average rate of Non-serious Adverse Events	No statistical difference between groups	there was no difference be- tween the oral Δ-9-tetrahydrocannabinol–cannabidiol and control groups (RR 1.31, 95% CI 0.88–1.96).
664
713	Published SR	Current Medical Research And Opinion	Iskedjian, M	2007	Canada	NA	Industry	To undertake an evidence based review to quantify the effect of cannabis based drugs in the management of pain related to MS or comparable neuropathic pain syndromes.	Soley focused on medical cannabis	Medline, Embase, Cochrane, and HealthSTAR	4	inception to the end of June 2006	We attempted to obtain all randomized, double- blinded, placebo controlled trials involving the use of cannabis-based drugs in the treatment of pain associated with MS or comparable neuropathic pain in adults ≥ 18 years of age. We assumed neuropathic pain to be comparable to MS related pain; hence we included all studies of cannabinoids in neuropathic pain. Only full peer reviewed articles were a…	Not reported	Not Defined	Not defined	Various types	Cannabis Based Drugs (unclear from methods which specifc types)	active drug and/or placebo	Diseases of the nervous system	Symptoms, signs and abnormal clinical and laboratory findings, not elsewhere classified		MS or Neuropathic Pain	Not defined	Adults (18+)	Not reported	NA	Pain	Yes	Yes	Jadad scale	7	298	NR	RCTs or quasi-RCTs	NA	Adults (18+)	Authors' text	Based on reporting, this is not an appropriate meta-analysis and these results should be interpreted with caution. They have analyzed data almost as one trial (pooling interventions vs. placebos across all studies) and have not properly weighted the studies. There is also no mention of correlation within studies.	MS or Neuropathic pain	Cannabidiol/THC buccal spray, Cannabidiol, Dronabinol	Placebo	Pain		Favours intervention			All of the active drugs produced endpoint-baseline score reductions that were in excess of 1.5 points on the 11-point scale and all were statistically significant... At endpoint, cannabis preparations were superior to placebo, with a difference in effect size of 0.8 point (p = 0.029).	Cannabinoids are associated with a clinically relevant and statistically significant lowering of pain scores. Some patients do not obtain relief, but others respond very well. A need exists for further studies of clinical outcomes of pain in MS. Economic implications should also be examined.
714	Published SR	Cochrane Database of Systematic Reviews	Mills, RJ	2007	UK	N/A	Not reported	To assess the efficacy and tolerability of both pharmacological and non-pharmacologic treatments of ataxia and tremor in patients with MS.	Mixed pharmaceutical and CAM interventions (cannabis included)	Cochrane MS Group Trials Register, CENTRAL, MEDLINE, EMBASE	4	Register: June 2006; CENTRAL: Issue 2, 2006, MEDLINE: 1966-June 2006; EMBASE: 1988-June 2006	Blinded, randomised trials which were either placebo-controlled or which compared two or more treatments for patients with MS were included. Trials testing pharmacological agents must have had both participant and assessor blinding. Trials testing surgical interventions or effects of physiotherapy, where participants could not have been blinded to the treatment, must have had independent assessor…	Protocol mentioned, but no link or registration # reported	Not defined	Not defined	Various types	Not specified in methods: extracts of dronabinol, Cannador and Sativex	placebo or another treatment	Diseases of the nervous system			Multiple sclerosis	NR	Mixed (adults and children)	Mixed	N/A	Ataxia	Yes	Yes	Cochrane RoB	3	43	13-16	RCTs or quasi-RCTs	RCTs	Not reported	Authors' text	Narrative synthesis (3 studies)	MS	Sativex, Cannador, dronabinol or plant extract	placebo				tremor	No statistical difference between groups	"The conclusion derived from all three studies was that cannabis based medicine resulted in no significant improvement in tremor"	A large number of studies have attempted to assess the efficacy and tolerability of various pharmacological agents and non-pharmacological therapies and have been identified by this systematic review. Only about a fifth were of sufficient methodological quality to warrant being reviewed in greater detail. Many studies failed to show significant differences in primary outcome measures for pharmaco…
714																																						Authors' text		MS	Sativex	placebo				pain (VAS score)	Reported study-by-study without synthesizing results
714																																						Authors' text		MS	Sativex	placebo				arm and hand function (9HPT score)	Reported study-by-study without synthesizing results
714																																						Authors' text		MS	Cannador	placebo				ataxia outcomes	Reported study-by-study without synthesizing results
714																																						Authors' text		MS	dronabinol or plant extract	placebo				arm and hand function (9HPT score)	Reported study-by-study without synthesizing results
714																																						Authors' text		MS	dronabinol or plant extract	placebo				disability outcomes (MSFC or QoL indicators)	Reported study-by-study without synthesizing results
789	Published SR	Cochrane Database of Systematic Reviews	Shakespeare, D	2003	UK	N/A	Not reported	The objective of this review was to assess the absolute and com- parative efficacy and tolerability of anti-spasticity agents in MS patients.	Various pharmaceutical interventions (cannabis being one)	Cochrane Multiple Sclerosis Group trials register, the Cochrane Central Register of Controlled Trials (CENTRAL), MEDLINE (PubMed) and EMBASE	4	Cochrane Multiple Sclerosis Group trials register: June2003, the Cochrane Central Register of Controlled Trials (CENTRAL): “The Cochrane Library, 2003, issue 2, MEDLINE (PubMed): from 1966 to June 2003, and EMBASE: from 1988 to June 2003	Types of studies: Double-blind, randomised controlled trials (RCTs) of treatment duration longer than seven days which are either placebo-con- trolled or comparing two or more agents were analysed. Quasi- randomised, unrandomised and unblinded trials were excluded. Cross-over trials were included and the authors were contacted to obtain information about the results of each period of the study. T…	Protocol completed, and link and/or registration # reported	Not defined	Not defined	Plant-derived cannabinoids (e.g. THC, cannabidiol, THCV, nabiximols (e.g.Sativex))	cannabinoids (unclear which ones)	placebo-controlled or comparing two or more agents	Diseases of the nervous system			MS	Not defined	Not reported	Not reported	N/A	Spasticity	Yes	Yes	Did not specify a tool - but they assessed: "Randomisation, blinding (health providers, assessors and participants), whether the groups were truly identical in terms of stage of disease and pre-treatment spasticity level, progress of disease during the trial (e.g. number of relapses), other concomitant drug treatments, non-drug treatments for spasticity (e.g. physiotherapy regimes), assessment of…	2	58	NR	RCTs or quasi-RCTs		Not reported	Authors' text	Narrative Synthesis - 2 studies	MS	delta9- tetrahydrocannabinol (THC), C. sativa plant extract, THC:CBD	Placebo				Ashworth Score	No statistical difference between groups	Killestein 2002 and Wade 2003 both reported no significant dif- ference in mean Ashworth score in either of the two active treat- ment groups compared to placebo.	This systematic review has identified a large number of studies which have attempted to assess the absolute and comparative ef-ficacy of various anti-spasticity agents in multiple sclerosis. The variability of spasticity and the lack of a sensitive, reliable, func- tionally- and symptomatically-relevant assessment tool for spas- ticity have contributed to the inconclusive results of placebo-con- …
789																																						Authors' text	1 study	MS	delta9- tetrahydrocannabinol (THC)	Placebo				Brainstem Functioning	Reported study-by-study without synthesizing results	Killestein 2002 noted a wors- ening in the brainstem functional systems score in the plant ex- tract group, and a worsening in the total MS functional compos- ite score (9 hole peg test, 25 feet timed walk, Paced Auditory Se- rial Addition Test) and participant’ subjective global rating in the delta9- tetrahydrocannabinol (THC) treated group.
789																																						Authors' text	1 study	MS	delta9- tetrahydrocannabinol (THC)					MS Functional Composite Score	Reported study-by-study without synthesizing results	^ favours control
789																																						Authors' text	1 study	MS	delta9- tetrahydrocannabinol (THC)					Subjective Global Rating	Reported study-by-study without synthesizing results	^^ Favours control
789																																						Authors' text	1 study	MS	THC:CBD	Placebo	Pain		Reported study-by-study without synthesizing results	Spasms and Spasticity	Reported study-by-study without synthesizing results	Wade 2003 reported a significant improvement in mean VAS scores for pain, spasms and spasticity, and numerical rating of spasticity severity and spasm frequency compared to placebo.
789																																						Authors' text	1 study	MS	THC:CBD	Placebo				Numerical Rating of Spasticity Severity	Reported study-by-study without synthesizing results	^ Favours intervention
789																																						Authors' text	1 study	MS	THC:CBD	Placebo				Spasm Frequency	Reported study-by-study without synthesizing results	^ Favours intervention
816	Published SR	BMJ	Campbell, F	2001	UK	N/A	Not reported	The purpose of this systematic review was to find all of the randomised controlled trials of therapeutic use of cannabis in the management of human pain and then to obtain the best estimates of the efficacy of cannabis com- pared with either conventional analgesics or placebo. We also sought evidence of adverse effects (safety).	Soley focused on medical cannabis	Medline, Embase, the Oxford Pain Database and the Cochrane Library	4	Medline: 1966-99, Embase: 1974-99, the Oxford Pain Database: 1950-94, and the Cochrane Library: 1999, issue 3. The most recent search was done in October 1999	Randomised controlled trials of cannabis and its active constituents (namely, cannabinoids) in human pain were sought systematically. Studies of experimental pain were excluded. Relevant papers had to report on comparisons of cannabis or cannabinoids (experimen- tal intervention, given by any route of administration) with any analgesic or placebo (control intervention).	Not reported	Not explicitly defined - they state: "In Britain doctors were able to prescribe cannabis as recently as 1971,4 and in a 1994 survey 74% of UK doctors wanted cannabis to be avail- 5 able on prescription, as it had been until 1971. The debate has included both the natural chemicals that act on cannabinoid receptors and the synthetic cannabi- noids. The synthetic nabilone is the only legally availab…	Introduction	Various types	cannabis or cannabinoids	any analgesic or placebo	Symptoms, signs and abnormal clinical and laboratory findings, not elsewhere classified	Neoplasms		Pain	Not defined	Not reported	Not reported	N/A	Pain	Yes	No	Oxford scale	9	222	1-37	RCTs or quasi-RCTs	N/A	Not reported	Authors' text	Narrative Synthesis (in discussion section) - 9 studies	Cancer Pain, Non-malignant Chronic Pain, Post Operative Pain	intramuscular and oral cannabinoids	Placebo	Nociceptive Pain		Favours intervention			In eight of the nine trials intramuscular and oral cannabinoids were more effective analgesics than placebo but no more effective than oral codeine 50-120 mg.	The best that can be achieved with single dose canna- bis in nociceptive pain is analgesia equivalent to single dose codeine 60 mg, which rates poorly on relative efficacy compared with non-steroidal anti- inflammatory drugs or simple analgesics. Increasing the cannabinoid dose to increase the analgesia will increase adverse effects. More intriguing perhaps than these relatively negative analgesi…
816																																						Authors' text	Narrative Synthesis (in discussion section) - 9 studies	Cancer Pain, Non-malignant Chronic Pain, Postoperative Pain	intramuscular and oral cannabinoids	Codeine	Nociceptive Pain		No statistical difference between groups			^
816																																						Authors' text	Narrative Synthesis (in discussion section) - 2 studies	Postoperative pain	levonantradol (intramuscular)	Placebo	Other (specify in AZ)	Postoperative pain	Favours intervention			In the two postoperative pain trials levonantradol was superior to placebo but no more effective than codeine.27 Such a level of efficacy makes cannabinoids unlikely to be useful, certainly for moderate or severe postoperative pain.
816																																						Authors' text	Narrative Synthesis (in discussion section) - 2 studies	Postoperative pain	levonantradol	codeine	Other (specify in AZ)	Postoperative pain	No statistical difference between groups			^ Such a level of efficacy makes cannabinoids unlikely to be useful, certainly for moderate or severe postoperative pain.
816																																						Authors' text	Narrative Synthesis (in discussion section) - 5 studies	Cancer	cannabinoid	Codeine	Other (specify in AZ)	Cancer Pain	No statistical difference between groups			All five trials in cancer pain were single dose, and four found the cannabinoid as effective as codeine, but with dose lim- iting adverse effects.
816																																						Authors' text	1 study	Cancer	Benzopyranoperidine	Codeine and Placebo	Other (specify in AZ)	Cancer Pain	Reported study-by-study without synthesizing results			Benzopyranoperidine, tested in one trial, was ineffective compared with both codeine and placebo.21
816																																						Authors' text	1 study with n=1	Mediterannean Fever	THC	Placebo	Other (specify in AZ)	Abdominal Pain	Reported study-by-study without synthesizing results			In a patient with abdominal pain related to familial Medi- terranean fever, neither THC nor placebo produced pain relief, but with THC the patient used less additional morphine for breakthrough pain.2
816																																						Authors' text	1 study with n=1	Neuropathic pain and spasticity	THC	Codeine	Neuropathic Pain		Reported study-by-study without synthesizing results	Spasticity	Reported study-by-study without synthesizing results	In Mau- rer et al’s n of 1 study of THC 5 mg for neuropathic pain and spasticity, the reduction in pain intensity was similar to that for codeine 50 mg, but only THC reduced spasticity.26
816																																						Authors' text	1 study	MS	Smoked marijuana	smoked placebo				Subjective improvement of MS symptoms	Reported study-by-study without synthesizing results	one trial compared the effect of smoked marijuana with smoked placebo on postural balance in patients with spastic multiple sclerosis.16 The smoked marijuana was associ-ated with subjective improvement of symptoms and with objectively measured impaired posture and balance in all subjects.
816																																						Authors' text	1 study	MS	Smoked marijuana	smoked placebo				Balance	Reported study-by-study without synthesizing results	^
824	Published SR	Thorax	Huntley, A	2000	UK	N/A	Not reported	This review provides a critical analysis of herbal medicinal products used in the treatment of asthma symptoms that have been the subject of randomised clinical trials	Various pharmaceutical interventions (cannabis being one)	Medline, Pubmed, Cochrane Library, Embase	4	Inception to Dec 1999	Published RCTs of asthmatic subjects; Any studies involving experimentally induced asthma or patients suffering from other medical conditions in addition to their asthma were excluded.	Not reported	Not defined	Not defined	Not reported	Not defined in methods; studies included on marihuana (THC)	NR	Diseases of the respiratory system			Asthma	NR	Not reported	Not reported	N/A	Treatment of Asthma	Yes	Yes	Jadad	1	10	N/A	RCTs or quasi-RCTs	RCTs	Adults (18+)	Authors' text		Asthma	THC	placebo				Airway resistance (raw)	Reported study-by-study without synthesizing results	only 1 study included: "smoking and ingestionof marihuana results in lower Raw but not clinicially relevant"	There is no fully convincing evidence for any of the herbal preparations described in this paper. Lack of blinding, description of adverse eVects, and dropout/withdrawal rates were frequent limitations. Outcome measures were variable and, in several cases, of doubtful relevance. Although some trials yielded positive results, their flaws mean that further meticulous investigations are required. It…
1043	Published SR	AIDS Care	Merlin, JS	2016	USA	N/A	Government	We conducted a systematic review of studies examining the impact of pharmacologic or non-pharmacologic interventions on pain or function among HIV-infected individuals with chronic pain.	Mixed pharmaceutical and CAM interventions (cannabis included)	Pubmed, CINHAL, PsychInfo, CENTRAL, Scopus	5	Pubmed, CINHAL, PsychInfo, Scopus: inception to Jan 2015; CENTRAL: 6/2014	Articles were eligible for inclusion if: (1) the article reported original research (i.e., not a review or commentary); (2) subjects were HIV-infected adult human subjects; (3) subjects had chronic pain (≥3 months’ duration by study inclusion criteria, or reported a mean duration of pain of ≥3 months) (Institute of Medicine, 2011); (4) study examined the impact of any exposure or intervention on …	Not reported	Not defined	Not defined	Not reported	Not reported in methods: smoked cannabis as intervention in included studies	NR	Certain infectious and parasitic diseases			HIV	"very high human development” country based on the United Nations Human Development report	Adults (18+)	Not reported	N/A	Chronic pain	Yes	No	GRADE and checklist of quality indicators	1	55	N/A	RCTs or quasi-RCTs	RCTs	Adults (18+)	Authors' text		HIV	Cannabis (smoked)	placebo	Neuropathic Pain		Reported study-by-study without synthesizing results			"It is also noteworthy that while HIV is an indication for prescribing medical cannabis in some states, we identified only one study that met our inclusion criteria and investigated smoked cannabis for chronic pain in individuals with HIV...median pain on a visual analog scale (VAS) decreased twice as much (34% vs. 17%) in the cannabis group compared to the placebo"	Despite the clinical burden of chronic pain in this population, this systematic review identified only 11 studies that examined treatments for chronic pain in individuals with HIV. Most were low or very low quality. Although much of chronic pain in the current HIV treatment era is musculoskeletal, over half of the studies focused on neuropathic pain. Based on these findings, though some intervent…
1136	Published SR	Journal of Neuroimmune Pharmacology	Lynch, ME	2015	Canada	N/A	Not reported	This is an updated systematic review of controlled trials done since the previous systematic review regarding cannabinoids in the treatment of chronic non-cancer pain (Lynch and Campbell 2011).	Soley focused on medical cannabis	PubMed, Embase, CINAHL (EBSCO), PsycInfo (EBSCO), The Cochrane Library (Wiley), ISI Web of Science, ABI Inform (Proquest), Dissertation Abstracts (Proquest), Academic Search Premier (EBSCO), Google Scholar	10	2010 - October 2014	Included in this review were RCTs comparing a cannabinoid with a placebo or active control group where pain was a reported measured outcome in subjects with chronic non-cancer pain. Relevant outcomes included any scale measuring pain. Excluded were trials where pain was not reported as an outcome, trials regarding experimental or acute pain and cancer pain, preclinical studies, abstracts, letters…	Not reported	Not specifically reported, but authors state: "Due to patient demand, several nations (or states within countries) have developed programs to allow people with serious health conditions to access cannabis (marijuana) for medicinal purposes. Most of these programs (e.g., Canada, Israel, Netherlands, several US States) require physician or nurse practitioner support for the individual patient to be…	Introduction	Various types	"Cannabinoids" not specifically defined. Search inluded: cannabis, cannabinoids (THC, CBD or THC:CBD), synthetics (dronabinol)	placebo or active comparator	Injury, poisoning and certain other consequences of external causes			Chronic non-cancer pain: FM, medication overuse, MS, OA, diabetic neuropathy, and other illnesses not specified	NR	Not reported	Not reported	N/A	pain	Yes	Yes	modified Oxford scale	11	1185	NR	RCTs or quasi-RCTs	N/A	Not reported	Authors' text	Narrative Synthesis - 7 studies	Chronic Pain	cannabinoids	unclear - placebo, amitriptyline or ibuprofen	Analgesia		Favours intervention			Overall 7 studies demonstrated that the cannabinoid under study ex- hibited an analgesic effect that was significantly better than the control.	This is an update to a previous systematic review examining RCTs using cannabinoids for treatment of chronic non-cancer pain. The current review found 11 RCTs published since our last review, 7 of which demonstrated significant analgesic effects by the cannabinoids studied. Several trials also reported benefits in sleep and 2 of the MS trials also demonstrated benefits in muscle stiffness and spa…
1136																																						Authors' text	1 study	medication overuse headache	Nabilone	Ibuprofen	Other (specify in AZ)	Pain Intensity	Reported study-by-study without synthesizing results	Analgesic Intake and Dependence	Reported study-by-study without synthesizing results	In a study of medication overuse headache (N = 26/30), nabilone was superior to ibuprofen in reducing daily analgesic intake, pain intensity and level of dependence and was equally efficacious in reducing frequen- cy (Pini et al. 2012)
1136																																						Authors' text	1 study	painful diabetic neuropathy	Nabilone	Placebo	Pain		Reported study-by-study without synthesizing results	Sleep	Reported study-by-study without synthesizing results	In a study of patients with painful diabetic neuropathy (N = 25/26) nabilone was significantly more effec- tive than placebo in reducing pain with significant improve- ments in secondary measures of anxiety and sleep (Toth et al. 2012).
1136																																						Authors' text								Anxiety	Reported study-by-study without synthesizing results	^
1136																																						Authors' text	1 study	Fibromyalgia	Nabilone	amitriptyline	Pain		Reported study-by-study without synthesizing results	Sleep Quality	Reported study-by-study without synthesizing results	In a study using amitriptyline as an active control examining sleep with pain as a secondary measure in fibro- myalgia (N = 29/32), both agents improved sleep with nabilone demonstrating significantly more improvement in sleep quality on one of the sleep measures;there was no sig- nificant impact on pain, however subjects started with a rela- tively low mean pain score of 2.3/10 (Ware et al. 2010…
1136																																						Authors' text	1 study	MS	Nabilone (+Gabapentin)	Placebo	Pain	VAS and patient global assessment of change	Reported study-by-study without synthesizing results			In a study of MS pain (N = 14/15) nabilone was demonstrated to improve pain significantly more than placebo in combination with gabapentin according to both the VAS and patient global assessment of change (Turcotte et al. 2014).
1136																																						Authors' text	1 study	neuropathic pain associated with allodynia	oral mucosal cannabis spray	Placebo	Analgesia		Reported study-by-study without synthesizing results	Sleep	Reported study-by-study without synthesizing results	In neuropathic pain associated with allodynia (N = 173/246), the oral mucosal can- nabis spray demonstrated a significant analgesic effect with improvements in sleep and subject global impression of change (Serpell et al. 2014)
1136																																						Authors' text								subject global impression of change	Reported study-by-study without synthesizing results	^
1136																																						Authors' text	1 study	MS	oral mucosal cannabis spray	Placebo	Neuropathic Pain	10 weeks	Reported study-by-study without synthesizing results			In a study involving neuropathic pain in MS (N = 297/339) oral mucosal cannabis spray dem- onstrated a reduction in pain compared to placebo at 10 weeks; however at 14 weeks, pain scores did not differ between the oral mucosal cannabis spray and placebo groups (Langford et al. 2013)
1136																																						Authors' text						14 weeks	Reported study-by-study without synthesizing results			^
1136																																						Authors' text	1 study	chemotherapy induced neuropathic pain	oral mucosal cannabis spray	Placebo	Neuropathic Pain	NRS Pain Scores	Reported study-by-study without synthesizing results			In a pilot study of chemotherapy induced neuropathic pain (N = 16/18), NRS pain scores did not demonstrate a statistically significant difference
1136																																						Authors' text	1 study	MS with spasticity	oral cannabis extract	Placebo	Other (specify in AZ)	Muscle Stiffness Pain	Reported study-by-study without synthesizing results	Sleep	Reported study-by-study without synthesizing results	One study examined an oral cannabis extract in multiple sclerosis with spasticity as the primary measure and pain as a secondary measure (N = 224/259) and found relief from muscle stiffness pain and sleep was twice as good with the cannabis extract than with placebo (Zajicek et al. 2012).
1136																																						Authors' text	1 study	neuropathic pain	cannabis (lower dose (1.29 % THC) and higher dose (3.53 % THC))	Placebo	Analgesia					In neuropathic pain, cannabis containing both a lower dose (1.29 % THC) and higher dose (3.53 % THC) delivered by vaporizer demonstrated a significant analgesic response as compared to placebo with an NNT for 30 % re- duction of 3.2 and 2.9 respectively for low and higher dose cannabis (Wilsey et al. 2013).
1136																																						Authors' text	1 study	MS	smoked cannabis (containing 4 % THC)	Placebo	Analgesia			Antispasticity	Reported study-by-study without synthesizing results	In a study of MS spasticity and pain, smoked cannabis containing 4 % THC demonstrated a significant antispasticity and analgesic effect compared with placebo (Corey-Bloom et al. 2012).
1138	Published SR	The Lancet Neurology	Finnerup, NB	2015	France	N/A	Non-profit/academic	Not specifically an objective: "We did a systematic review and meta-analysis of randomised controlled trials of all drug treatments for neuropathic pain published since 1966 and of nonpublished trials with available results, and assessed publication bias.	Various pharmaceutical interventions (cannabis being one)	PubMed, Medline, the Cochrane Central Register of Controlled Trials, and Embase; ClinicalTrials.gov	5	January 1966 - April 2013; additional search up to Jan 31, 2014, retrieved papers from PubMed and the ClinicalTrials.gov	The target population was patients of any age with neuropathic pain according to the International Association for the Study of Pain definition; Disorders such as complex regional pain syndrome type 1, low back pain without radicular pain, fibromyalgia, and atypical facial pain were not included; RCTs with parallel group or crossover study designs that had at least ten patients per group; we excl…	Protocol completed, and link and/or registration # reported	Not defined	Not defined	Various types	Cannabinoids: including Sativex and Dronabinol	Placebo	Symptoms, signs and abnormal clinical and laboratory findings, not elsewhere classified			Neuropathic pain (post-herpetic neuralgia, diabetic and non-diabetic painful polyneuropathy, post-amputation pain, post-traumatic or post-surgical neuropathic pain including plexus avulsion and complex regional pain syndrome type 2 (which was generally subsumed into post-traumatic or post-surgical neuropathic pain), central post-stroke pain, spinal cord injury pain, and multiple sclerosis-associa…	NR	Mixed (adults and children)	Not reported	N/A	Pain	Yes	Yes	five-point Oxford Quality Scale (Jadad)	9	1310	NR	RCTs or quasi-RCTs	N/A	Not reported	Authors' text	7 studies narratively synthesized in text; meta-analysis of 9 studies in supplementary material. "Numbers needed to treat (NNT) for 50% pain intensity reduction (alternatively, 30% pain reduction or at least moderate pain relief if data for 50% pain reduction is not available) is the primary effect measure."	various: MS, PPN diabetes, mixed with allodynia, SCI	Nabiximols (Sativex)	placebo	Neuropathic Pain		No statistical difference between groups				"We provide a weak recommendation against the use of cannabinoids in neuropathic pain, mainly because of negative results, potential misuse, diversion, and long-term mental health risks of cannabis particularly in susceptible individuals."
1138																																						Meta-analysis	NNH: Numbers needed to harm (NNH) is calculated as the number of patients that needed to be treated for one patient to drop out due to adverse effects.	various: MS, PPN diabetes, mixed with allodynia, SCI	Nabiximols (Sativex)	placebo				Number needed to harm	Favours intervention
1138																																						Meta-analysis	Risk difference (fixed and random) of 5 studies	various	Nabiximols (Sativex)	placebo	Neuropathic Pain		No statistical difference between groups
1138																																						Authors' text	1study	MS	Nabiximols	placebo	Neuropathic Pain		Reported study-by-study without synthesizing results			"We identified nine trials of nabiximols in neuropathic pain, of which only two were positive. One of these two studies of pain associated with multiple sclerosis was positive, whereas the other larger study had a negative primary outcome."
1138																																						Authors' text	1 study	MS	Nabiximols	placebo	Neuropathic Pain		Reported study-by-study without synthesizing results
1211	Published SR	Pain Practice	Snedecor, S	2013	USA	N/A	Industry	This study aimed to assess the totality of available treatments for pDPN by conducting a comprehensive systematic review and meta-analytic comparison of all available randomized, controlled clinical trials evaluating available pharmacologic therapies for the treatment of pDPN with the goal of comparing efficacy (pain reduction) and harms (discontinuations and adverse events [AEs]).	Various pharmaceutical interventions (cannabis being one)	MEDLINE, Cochrane Database of Systematic Reviews, CENTRAL, EMBASE, DARE	5	up to June 2011	Inclusion criteria consisted of randomized, controlled trials in pDPN in adults aged 18 years. Studies < 4 weeks in duration were excluded, as well as broad pain studies, where pDPN patients were not distinguished in subgroup analyses. Studies of therapies, combined with nondrug modalities like physical therapy, administered intramuscularly or intravenously, no longer used to treat NeP, over-the-…	Not reported	Not defined	Not defined	Plant-derived cannabinoids (e.g. THC, cannabidiol, THCV, nabiximols (e.g.Sativex))	Not defined in methods: Sativex included	NR	Edocrine, nutritional and metabolic diseases			Diabetes	NR	Adults (18+)	Not reported	N/A	painful diabetic peripheral neuropathy	Yes	Yes	Jadad	1	30	N/A	RCTs or quasi-RCTs	RCTs	Adults (18+)	Network meta-analysis	Mixed treatment comparison methodology was used to determine overall relative efficacy and harms for all therapies relative to placebo	Diabetes	Sativex	Placebo	Peripheral Neuropathic Pain	Mean reduction in pain over that of placebo	Favours control			Mixed treatment comparisons estimating the mean reduction in pain over that of placebo on the 11-point NRS showed Sativex as least effective.	This study compiled all available data for pharmacologic treatments for pDPN into one comprehensive framework to generate more compatible efficacy estimates than could be made by simply examining individual studies side-by-side. This analysis, which used Bayesian MTC methodology, provided consistent results for the subset of treatments that had been previously analyzed using standard meta-analyti…
1211																																						Network meta-analysis	Mixed treatment comparison methodology was used to determine overall relative efficacy and harms for all therapies relative to placebo	Diabetes	Sativex	Placebo	Peripheral Neuropathic Pain	Mean probability of 30% reduction in pain	No statistical difference between groups	Mean health state utility	No statistical difference between groups	mean increase in EQ-5D utility for Sativex showed the least improvement
1336	Published SR	Multiple Sclerosis Journal	Kuspinar, A	2012	Canada	N/A	Non-profit/academic	The objective of this systematic review is to estimate the extent to which existing health care interventions designed specifically to target HRQL in persons with MS achieve this aim.	Mixed pharmaceutical and CAM interventions (cannabis included)	Ovid MEDLINE, EMBASE, Cumulative Index to Nursing and Allied Health Literature and the Cochrane Central Register of Controlled Trials (CENTRAL)	4	Ovid MEDLINE: 1948 to September 2011, EMBASE: 1980 to September 2011, Cumulative Index to Nursing and Allied Health Literature: 1960 to September 2011 and the Cochrane Central Register of Controlled Trials (CENTRAL): no dates reported	Only parallel group randomized controlled trials (RCTs) were included. Cross-over RCTs were excluded because of the difficulty in separating the intervention effect. Studies published in languages other than English or French and unpublished or grey literature were excluded... Persons with clinically definite MS were included in the review without restrictions for disease severity, sex, type of M…	Not reported	Not defined	Not defined	Plant-derived cannabinoids (e.g. THC, cannabidiol, THCV, nabiximols (e.g.Sativex))	Not reported in methods - from results: Sativex	inactive (e.g. placebo, no treatment, usual care or a waiting list control), or active (e.g. a different drug or a different kind of therapy).	Diseases of the nervous system			MS	Not defined	Adults (18+)	Mixed	N/A	Bladder control issues	Yes	Yes	Cochrane risk of bias tool	1	130	NA	RCTs or quasi-RCTs	N/A	Adults (18+)	Authors' text	1 study	Overactive Bladder (from MS)	Sativex	Placebo				Number of Incontinence Episodes	Reported study-by-study without synthesizing results		The extent to which interventions are able to improve out- comes depends on delivering a potent intervention to those persons who have the potential to benefit. Therefore, interventions targeting specific outcomes will be more effective for those people with the targeted problem (e.g. pain, spasticity, incontinence, or memory and attention deficits). These targeted interventions are often include…
1336																																						Authors' text	2 study	Overactive Bladder (from MS)	Sativex	Placebo				Incontinence Quality of Life Questionnaire	Reported study-by-study without synthesizing results
1370	Published SR	Cochrane Database of Systematic Reviews	Gloss, D	2014	USA	N/A	Not reported	To assess the efficacy and safety of cannabinoids when used as monotherapy or add-on treatment for people with epilepsy.	Soley focused on medical cannabis	Cochrane Epilepsy Group Specialized Register, CENTRAL, MEDLINE, CINAHL, ISI Web of Knowledge, Clinicaltrials.gov	6	searched on Setpember 9, 2013	RCTs (blinded or not); people of any age or sex, with epilepsy of any type; Any type of marijuana, synthetic or natural THC, cannabinol, cannabidiol, or combinations that include these agents, for ingestion or inhalation for the control of seizures. We did not exclude trials that used other anti-epileptic medications.	Protocol mentioned, but no link or registration # reported	This review will assess the ingestion of marijuana, THC or synthetic cannabinoids (which must include cannabinol, but can include other agents such as cannabidiol) either orally or by inhalation for the treatment of seizures...We wish to examine if there is enough efficacy and safety of cannabinoids in epilepsy, through an examination of the medical evidence, to use it as a treatment for epilepsy	Introduction	Various types	Any type of marijuana, synthetic or natural THC, cannabinol, cannabidiol, or combinations that include these agents	NR; but trials were included if they compared one type of cannabinol to another	Diseases of the nervous system			Epilepsy	NR	Mixed (adults and children)	Mixed	N/A	Treatment of epilepsy	Yes	Yes	Cochrane RoB	4	48	NR	RCTs or quasi-RCTs	4 RCTs, but two were reported as abstract and letter to the editor	Not reported												None of the four studies provided information to address the primary outcome of this review, seizure freedom for 12 months or three times the longest interseizure interval. Of the secondary outcomes, the only one that could be answered was that there were no significant side effects in any of the patients studied except in one study (Ames 1985) which reported mild drowsiness. No reliable conclusi…
1416	Published SR	Rheumatology	Macfarlane, GJ	2011	UK	N/A	Non-profit/academic	The purpose of this review is to produce such evidence regarding CAMs (and for RA these are likely to be complementary rather than alternative) taken orally or applied topically for the treatment of RA utilizing, where possible, the recently published guidelines on Preferred Reporting Items for Systematic Reviews and Meta-Analyses (PRISMA) (http://www.prisma-statement.org/).	Various CAM interventions (cannabis being one)	Allied and Complementary Medicine, EMBASE, Ovid MEDLINE, ACP Journal Club, CENTRAL, Cochrane Database of Systematic Reviews and DARE	7	Allied and Complementary Medicine (1985 to August 2010), EMBASE (1980 to August 2010), Ovid MEDLINE (1950 to August 2010), EBM Reviews ACP Journal Club (1991 to August 2010), EBM Reviews Cochrane Central Register of Controlled Trials (2nd Quarter 2010), EBM Reviews Cochrane Database of Systematic Reviews (2nd Quarter 2010) and EBM Reviews Database of Abstracts of Reviews of Effects (2nd Quarter 2…	(i) the study was an RCT involving a CAM; (ii) the route of administration was oral or topical; (iii) comparison was made with placebo or a treatment of established efficacy; (iv) the CAM was available in the UK; (v) the study involved human subjects with RA; and (vi) was published in English. Publications up until the end of August 2010 were eligible for inclusion in the review.	Not reported	Not defined	Not defined	Not reported	Not reported in methods, but cannabis oral spray included	placebo or treatment of established efficacy	Diseases of the musculoskeletal system and connective tissue			rheumatoid arthritis	NR	Not reported	Not reported	N/A	management symptoms of RA	No	No	Jadad	1	58	N/A	RCTs or quasi-RCTs		Not reported	Authors' text	1 study	rheumatoid arthritis	cannabis oral spray	placebo	Pain	Pain on movement, pain at rest, McGill pain questionnaire	Reported study-by-study without synthesizing results	quality of sleep	Reported study-by-study without synthesizing results		In conclusion, RA is a chronic disease associated with disability and potentially premature mortality. Despite the proven clinical efficacy of conventional pharmacological treatment, many patients try complementary medicines, often from fear of toxicity from other drugs. While most of the CAMs have few trials evaluating efficacy in RA, this systematic review of oral and topical CAMs (excluding fi…
1416																																						Authors' text	1 study	rheumatoid arthritis	cannabis oral spray	placebo				28-joint DAS	Reported study-by-study without synthesizing results
1427	Published SR	Journal of the American Geriatrics Society	Hanson, LC	2011	USA	N/A	Government	To enhance evidence-based decision-making, a systematic review of oral feeding options in dementia was conducted. The goal was to answer two important questions for dementia care: Does the addition of high-calorie supplements improve clinical outcomes, including weight gain, function, and survival? Do other oral feeding interventions such as appetite stimulants, assisted feeding, and modified die…	Mixed pharmaceutical and CAM interventions (cannabis included)	PubMed/MEDLINE, EMBASE, the Cochrane Library, CINAHL, and PsychINFO	5	January 1990 and October 2009	Study participants were aged 50 and older, with dementia of any stage or etiology and evidence of a feeding problem...Because some study populations varied in cognitive status, those that combined frail older persons with and without dementia were accepted. Participants could be in any setting: community, long-term care, or hospital. Eligible interventions included prescribed use of high-calorie …	Protocol mentioned, but no link or registration # reported	Not defined	Not defined	Synthetic cannabinoid (e.g. nabilone, dronabinol)	Not defined in methods, but included dronabinol	NR	Mental and behavioural disorders			Dementia	any setting (e.g.community, long-term care, or hospital)	Adults (18+)	Not reported	N/A	oral feeding	Yes	No	Cochrane RoB and use of a grading system	1	12	N/A	RCTs or quasi-RCTs		Adults (18+)	Authors' text	1 study	Dementia	Dronabinol	placebo				weight	Reported study-by-study without synthesizing results	Dronabinol considered an appetite stimulant.	This systematic review summarizes research on oral feeding in dementia. High-calorie supplements are an evidence-based option to promote weight gain for people with dementia and feeding problems. Assisted feeding, appetite stimulants, and modified foods may also improve weight, and treatments can be used individually or in combination. <<- this is contradicted by the following statements: "For th…
1427																																						Authors' text	1 study	Dementia	Dronabinol	placebo				negative affect	Reported study-by-study without synthesizing results
1427																																						Authors' text	1 study	Dementia	Dronabinol	placebo				disruptive behaviour	Reported study-by-study without synthesizing results
1455	Published SR	Cochrane Database of Systematic Reviews	Mestre, T	2009	Portugal	N/A	Non-profit/academic	Evaluate the effectiveness of therapeutic interventions aimed at controlling the symptoms of Huntington's Disease (HD.)	Mixed pharmaceutical and CAM interventions (cannabis included)	CENTRAL, MEDLINE, EMBASE and Clinical Trials Database of the United States NIH	4	CENTRAL: Issue 4, 2007; MEDLINE (1966 to December 2007); EMBASE (1974 to December 2007); Clinical Trials Database of the United States NIH (December 2007)	All randomised, double-blinded, placebo-controlled clinical trials conducted on any symptomatic therapy used for HD with at least ten participants were included. Participants should have HD clinical features and a confirmatory genetic diagnosis or a compatible family history. All disease variants and ages of disease onset were included. Cross-over studies were included. All pharmacological and no…	Protocol completed, and link and/or registration # reported	Not defined	Not defined	Plant-derived cannabinoids (e.g. THC, cannabidiol, THCV, nabiximols (e.g.Sativex))	Not defined in methods, but include cannabidiol	placebo or standard pharmacological treatment	Diseases of the nervous system			Huntington's Disease	NR	Not reported	Not reported	N/A	symptoms of HD	Yes	Yes	Cochrane RoB and Jadad	1	18	N/A	RCTs or quasi-RCTs	N/A	Adults (18+)	Authors' text	1 study	Huntington's Disease	Cannabidiol	placebo				chorea severity	Reported study-by-study without synthesizing results		No intervention has proven to have a consistent symptomatic control in HD...No statement can be made regarding the effectiveness of available medication in other areas of symptomatic control due to the lack of evidence extractable from clinical trials. No statement can be made regarding the best medical practice for the control of motor and non-motor symptoms in HD.
1455																																						Authors' text	1 study	Huntington's Disease	Cannabidiol	placebo				functional capacity	Reported study-by-study without synthesizing results
1455																																						Authors' text	1 study	Huntington's Disease	Cannabidiol	placebo				HD staging system	Reported study-by-study without synthesizing results
1455																																						Authors' text	1 study	Huntington's Disease	Cannabidiol	placebo				motor function, cognition and psychological distress (SLC-90R)	Reported study-by-study without synthesizing results
1493	Published SR	Journal of Clinical Psychopharmacology	Wheaton, P	2009	Australia	N/A	Non-profit/academic	The current study undertook a systematic review and meta-analysis of existing research that has evaluated the impact of the early administration (e7 days after injury) of pharmacological treatments on cognitive and behavioral outcomes after traumatic brain injury (TBI.)	Various pharmaceutical interventions (cannabis being one)	PsycINFO and PubMed	2	January 1980 to May 2008	(a) published in a journal; (b) published in English; (c) included a TBI control group that was matched to the treatment group on the basis of age and injury severity; (d) not a case study; (e) had TBI treatment and control groups that had sustained nonpenetrating TBIs; (f ) both groups were administered measures of cognition and/or behavior to assess outcome (ie, studies using only electrophysio…	Not reported	Not defined	Not defined	Synthetic cannabinoid (e.g. nabilone, dronabinol)	Not defined in methods, but included dexanabinol	NR	Injury, poisoning and certain other consequences of external causes			Traumatic brain injury	NR	Mixed (adults and children)	Not reported	N/A	Treatment: early treatment (≤ 7 days)for TBI	Yes	No	rating scale based on the criteria scale used by Sindhu et al	2	458	NR	RCTs or quasi-RCTs	N/A	Not reported	Direction of effect	2 studies: Cohen's d effect size	Traumatic brain injury	dexanabinol	placebo				global outcome (GOS)	Favours intervention	In combination, these studies only revealed a very small benefit (d = 0.1) to global outcome (GOS) at 3 months after injury.	The cannabinoid dexanabinol was associated with a dose-dependent improvement in the 3- and the 6-month global outcomes. But when considered in total, global outcome (GOS) did not improve with cannabinoid treatment at either 3 or 6 months after injury. These findings indicate that different drug dosages may have varying outcomes and that different cognitive and behavioral measures may be different…
1493																																						Direction of effect	1 study: Cohen's d effect size	Traumatic brain injury	dexanabinol (48mg/d)	placebo				global outcome (GOS)	Favours intervention	one study revealed a moderate to large treatment benefit (d = 0.67) for its small sample of participants (N = 30) when a dosage of 48 mg/d was administered within 6 hours of injury.
1493																																						Direction of effect	1 study: Cohen's d effect size	Traumatic brain injury	dexanabinol (150mg/d)	placebo				global outcome (GOS)	Favours intervention	The other study, which used a much higher dosage (150 mg/d), revealed negligible benefits (d = 0.06), albeit in a larger sample (N = 428).
1572	Published SR	Journal of Asthma	Singh, BB	2007	NR	USA	Non-profit/academic	The objective of this review is to critically assess articles (RCTs and QEDs) that reported on the efficacy/effectiveness of herbal products for the treatment of asthma.	Various CAM interventions (cannabis being one)	PubMed, Ovid, Mantis, EMBASE, Annotated Bibliography of Indian Medicine, and Cochrane library	6	inception to December 2004	RCTs or QEDs (quasi-experimental design) in which any form of herbal including Ayurvedic was administered orally or topically, was tested on asthma patients, both children and adults, and for which efficacy or effectiveness was measured via pulmonary function tests (PFT) and/or symptom scores.; Studies involving experimentally induced asthma on asthmatic patients were included in this review. Stu…	Not reported	Defined herb: "The definition of herb for this study is any leaf, flower, stem, seed, root, fruit, bark, or any other part of a plant used for the treatment of asthma.	Methods	Not reported	Including any part of the plant, so assume "plant-based" but unclear	NR	Diseases of the respiratory system			Asthma	NR	Mixed (adults and children)	Not reported	N/A	Symptoms of asthma	Yes	Yes	Jadad and Singh scales	4	80	NR	RCTs or quasi-RCTs	N/A	Adults (18+)	other	data on outcomes included in Table 6		marijuana (inhaled)	Placebo or isoproterenol				pulmonary function tests	Reported study-by-study without synthesizing results	Out of 4 included studies, all showed positive effects of marjuana - however, author's do not provide any synthesis or overview on this data, so unclear if we can use this	Most trials resulted in an improvement of respiratory functions and demonstrated favorable patient outcomes (i.e. reduction in number and severity of symptoms). However, due to the limited amount of substantial quantity and quality of evidence this review concludes that further research is still required to determine airway anti-inflammatory, symptoms and dosage effects. At this time, given the l…
1572																																						other	data on outcomes included in Table 6		marijuana (inhaled) - higher dose	marijuana (inhaled) - lower dose				pulmonary function tests	Reported study-by-study without synthesizing results
1587	Published SR	Movement Disorders	Chung, V	2006	China	NA	Non-profit/academic	Anecdotal evidence shows that some of these herbs offer beneficial effects,13–15 but their use has also raised much concern as to their safety.16 –18 We conducted this systematic review to shed light on their efficacy, safety, and clinical applicability.	Various CAM interventions (cannabis being one)	Cochrane Central Register of Controlled Trials, MEDLINE, CINAHL, AMED, Chinese Scientific Journal Database, Traditional Chinese Medicine Database, Chinese BioMedical disk (CD-ROM), China Academic Journal Full Text Database, China Proceedings of Conference Databases, China Doctorate/Master Dissertations Full Text Databases, and Database of On-going Trials (http://www.controlled-trials.com).	11	searched in July 2005	We considered randomized controlled studies of any duration. All patients had a clinical diagnosis of idio- pathic Parkinson’s disease as defined by the authors of the trial. Any age, gender, and length of disease his- tory were included. No patients with secondary Par- kinsonism were considered. The intervention of herbal medicines included extracts or oral decoctions of mul- tiple herbs or a si…	Not reported	Not defined	Not defined	Plant-based materials (e.g. marijuana, hashish)	cannador (from table 1)	Placebo, conventional drugs, or nonpharmacological intervention	Diseases of the nervous system			Parkinson's Disease	Not defined	Mixed (adults and children)	Mixed	NA	Treatment of Parkinson's	Yes	Yes	Methods developed by Crosby et al	1	11	N/A	RCTs or quasi-RCTs	N/A	Adults (18+)	Authors' text	1 study	Parkinson's Disease	Cannabis	Placebo				Therapeutic Effect on L-Dopa induced Dyskinesia	Reported study-by-study without synthesizing results	Carroll reached a conclusion that cannabis has no therapeutic effect on L-dopa–induced dyskinesia, as mea- sured by Question 32-24 of the UPDRS and by other relevant outcome measures.	The evidence presented in this review is insufficient to warrant any clinical recommendation due to the follow- ing reasons: (1) Nine different forms of HMs were tested in the nine studies included. They differ in composition, dosage preparation, and methods and manufacturing standards... With these variations, we are unable to ensure the quality, quantity, and nature of the herbal preparations o…
1587																																						Authors' text	1 study	Parkinson's Disease	Cannabis	Placebo				Unified Parkinson’s Disease Rating Scale (UPDRS)	Reported study-by-study without synthesizing results	In addition, no statistically significant improvements on overall UPDRS and PDQ-39 were observed.
1587																																						Authors' text	1 study	Parkinson's Disease	Cannabis	Placebo				Quality of Life (PDQ-39)	Reported study-by-study without synthesizing results	^^
1635	Published SR	JOURNAL OF CLINICAL ONCOLOGY	Yavuzsen, T	2005	USA	NA	Not reported	We undertook a systematic review of peer-reviewed published prospective randomized studies in the drug management of anorexia for the purpose of grading evidence for clinical utility.	Various pharmaceutical interventions (cannabis being one)	MEDLINE, Cumulative Index of Nursing and Allied Health Literature Information Systems (Glendale, CA), Cochrane Control Trials Register	3	MEDLINE: 1966 to October week 1, 2004; Cumulative Index of Nursing and Allied Health Literature Information Systems, Glendale, CA, 1982 to October week 2, 2004; Cochrane Control Trials Register, third quarter 2004)	This systematic review involved adult ( 18 years of age) patients with a clinical diagnosis of a nonhematologic malignancy and anorexia or symptoms indicative of anorexia, such as lack of appetite, weight loss, poor performance status, and diminished quality of life (QOL). The systematic review involved only prospective randomized controlled trials (RCTs) (double- and single-blind or unblinded an…	Not reported	Not defined	Not defined	Not reported	From Results: Synthetic Canabinoid (Dronabinol)	Not defined	Neoplasms	Edocrine, nutritional and metabolic diseases		Cancer	Not defined	Adults (18+)	Not reported	N/A	Anorexia and weight loss	No	No	Jadad	1	469	N/A	RCTs or quasi-RCTs		Adults (18+)	Authors' text	3-arm RCT; Dronabinol+placebo vs. MA+placebo vs. Dronabinol+MA	Cancer - anorexia	Dronabinol	megestrol acetate				Appetite	Reported study-by-study without synthesizing results	MA was significantly better than dronabinol,19 and fluoxymestrone for appetite.17	Dronabinol, EPA (or fish oil supplementation), EPO, ghrelin, interferon, melatonin, nandrolone, nonsteroidal anti-inflammatory drugs, and pentoxifylline have been studied in RCTs. They do not have enough evidence to justify routine use as appetite stimulants.
1635																																						p values reported	3-arm RCT; Dronabinol+placebo vs. MA+placebo vs. Dronabinol+MA	Cancer - anorexia	Dronabinol	megestrol acetate				Weight Gain	Reported study-by-study without synthesizing results	MA versus Dra weight gain (P .02)
1635																																						Authors' text	3-arm RCT; Dronabinol+placebo vs. MA+placebo vs. Dronabinol+MA	Cancer - anorexia	Dronabinol + megestrol acetate	megestrol acetate				Weight and Appetite	Reported study-by-study without synthesizing results	combination resulted in not significant weight and appetite over MA alone
1635																																						Authors' text	3-arm RCT; Dronabinol+placebo vs. MA+placebo vs. Dronabinol+MA	Cancer - anorexia	dronabinol	megestrol acetate				QoL	Reported study-by-study without synthesizing results	In con- trast, by the FAACT questionnaire, MA produced better QOL than dronabinol.
1635																																						Authors' text	3-arm RCT; Dronabinol+placebo vs. MA+placebo vs. Dronabinol+MA	Cancer - anorexia	Dronabinol + megestrol acetate	megestrol acetate				QoL	Reported study-by-study without synthesizing results	No significant QOL differences were found between the combination and MA, except the emo- tional construct for the FAACT was better with MA.
1725	Published SR	Neuropsychopharmacology	Nielsen, S	2017	Australia	N/A	Government	Despite the growing body of relevant literature, to date no systematic review has focused on the opioid-sparing effects of cannabinoids. To address this gap, we conducted a systematic review of pre- clinical and clinical studies to examine the strength of existing evidence demonstrating the opioid-sparing effect of cannabinoids in the context of analgesia.	Various pharmaceutical interventions (cannabis being one)	Scopus, Cochrane Database of Systematic Reviews, Medline, and Embase	4	No date limits were included. Searches were run on 29 October 2015.	Eligible studies included: Human or animal studies. Outcomes of either pain/analgesia or opioid requirements/ opioid-sparing effects from concurrently administered opioids and cannabinoids. Controlled clinical studies and case series.	Not reported	Opioid-sparing medications, when co-administered with opioids, enable a reduced opioid dose without loss of analgesic efficacy. Cannabinoid medications are increasingly being studied for their analge- sic- and opioid-sparing potential.	Introduction	Not reported	Only states cannabinoids	Not defined	Symptoms, signs and abnormal clinical and laboratory findings, not elsewhere classified			Chronic Pain	Not defined	Not reported	Not reported	Animals and Humans	Pain	Yes	Yes	GRADE	9	750	NR	Various (specify in column Ak)	Laboratory Studies, observational and controlled trials (randomized and non-randomized)	Not reported	Authors' text	Narrative Synthesis - 2 studies	Cancer Pain	delta-9-THC: Cannabidiol (THC : CBD) combination oral sprays (+opioids)	Placebo (+opioids)	Analgesia		Favours intervention			Two randomized controlled trials examined delta-9-THC: Cannabidiol (THC : CBD) combination oral sprays compared to a placebo (Johnson et al, 2010; Portenoy et al, 2012) in patients with cancer pain who were taking opioids. These studies found improved analgesia with the THC : CBD combination compared to the placebo.	In conclusion, pre-clinical studies support the opioid- sparing effect of delta-9-THC. However, the findings from clinical trials are inconsistent, with some studies found to have important limitations such as a lack of placebo control. An opioid-sparing effect of cannabinoids in chronic pain patients was observed in only one very-low-quality clinical study. These findings provide an early signal…
1725																																						Authors' text	Narrative Synthesis - number of studies unclear, 3 studies are graded high quality in table 2	Cancer and Chronic pain	delta-9-THC:CBD, delta-9-THC, or dronabinol or nabaximols (+opioids)	Placebo (+opioids)				Opioid Sparing Effect	Unclear efficacy (insufficient evidence)	None of the high- quality studies provided evidence of an opioid-sparing effect.
1725																																						Authors' text	Narrative Synthesis - 2 studies	Cancer pain	delta-9-THC:CBD, delta-9-THC, or dronabinol (+opioids)	Placebo (+opioids)				Opioid Sparing Effect	Favours control	Two controlled studies found no effect of cannabinoids on opioid dose requirements (Johnson et al, 2010; Seeling et al, 2006).
1725																																						Authors' text	1 study	Cancer and Chronic pain	Nabiximols (THC : CBD)	Placebo (+opioids)	Analgesia		Reported study-by-study without synthesizing results			Portenoy et al (2012) conducted a dose- ranging study, using fixed dose ranges of the THC : CBD combination. In this study, a significant analgesic effect was only found in the lowest dose group, with poorer tolerability observed for higher doses.
1725																																						Authors' text	1 study	Chronic Pain	Dronabinol	Placebo (+opioids)	Other (specify in AZ)	Pain Intensity	Reported study-by-study without synthesizing results			Narang et al (2008) found significantly reduced pain intensity with the opioid–cannabinoid combination in double-blinded laboratory sessions compared to opioid alone.
1725																																						Authors' text	1 study	Chronic Pain	Dronabinol	Placebo (+opioids)				Sleep	Reported study-by-study without synthesizing results	Additional improvements in sleep, energy, and social functioning were reported in a 4-week open-label phase of the same study (Narang et al, 2008).
1725																																						Authors' text	1 study	Chronic Pain	Dronabinol	Placebo (+opioids)				Energy	Reported study-by-study without synthesizing results	^
1725																																						Authors' text	1 study	Chronic Pain	Dronabinol	Placebo (+opioids)				Social Functioning	Reported study-by-study without synthesizing results	^^
1725																																						Authors' text	1 study	Cancer Pain	Dronabinol	Placebo (+opioids)				Opioid Sparing Effect	Reported study-by-study without synthesizing results	In the study by Seeling et al (2006), perioperative use of dronabinol compared with a placebo in patients with prostate cancer, no difference was found in self-administered opioid dose requirements between groups.
1725																																						Authors' text	1 study	Healthy Volunteers	Dronabinol and/or Morphine	Placebo (+opioids)		Experimental Pain	Reported study-by-study without synthesizing results
1801	Published Guideline with SR	CanJPsychiatry	Pringsheim, T	2012	Canada	N/A	Government	This article seeks to provide the practising clinician with guidance on the pharmacological management of tic disorders in children and adults. There are 2 primary clinical questions addressed in this guideline: Which medications are effective in suppressing tics? What are the bene ts and harms of these medications?	Various pharmaceutical interventions (cannabis being one)	MEDLINE and EMBASE	2	MEDLINE: 1950 to October 2010 and EMBASE: 1980 to October 2010	We included systematic reviews, RCTs, and prospective open-label studies on the treatment of tics in children or adults. When this type of evidence was not available, we searched for retrospective case series. The primary outcome assessed for this review was the treatment effect on tics as measured using validated scales, such as the YGTSS. Secondary outcomes included EPSs, sedation, metabolic si…	Not reported	Not defined	Not defined	Plant-derived cannabinoids (e.g. THC, cannabidiol, THCV, nabiximols (e.g.Sativex))	NR in methods - from results: delta-9-THC	Not defined in methods	Mental and behavioural disorders			Tics	Not defined	Mixed (adults and children)	Not reported	N/A	Treatment of Tic disorders	Yes	Yes	quality criteria developed by the USPSTF; AMSTAR for SRs	2	28	NR	RCTs or quasi-RCTs		Adults (18+)	Authors' text	Narrative Synthesis - 2 studies	Tics	delta-9-THC	Placebo				Tic Frequency and Severity	Favours intervention	Both trials reported a positive effect from THC, although the improvements in tic frequency and severity were small and detected only by some outcome measures.	Recommendation Grade for Cannabinoids in Children and Adolescents: Category X, Level 2, Not Recommended. Recommendation Grade for Cannabinoids in Adults: Weak Recommendation, Low-Quality Evidence. There is no evidence to support the use of cannabinoids for the treatment of tics in children or adolescents. Given this lack of evidence, as well as concerns about potential misuse, we do not recommend…
1962	Unpublished SR	report by CADTH Rapid Response Service	NR	2014	Canada	N/A	Not reported	This report will review the evidence of clinical effectiveness and safety of nabilone when used for the treatment of non-chemotherapy related nausea and vomiting and to manage weight loss attributed to medical conditions.	Soley focused on medical cannabis	Medline, Embase, PubMed, The Cochrane Library (2014, Issue 8), University of York Centre for Reviews and Dissemination (CRD) databases, Canadian and major international health technology agencies	5	published between January 1, 1982 and August 8, 2014.	Population : Adults and adolescents (Age ≥ 13 years old) with non-chemotherapy associated nausea and vomiting, Adults and adolescents (Age ≥ 13 years old) with weight loss due to a medical condition (such as anorexia, HIV, etc.) Intervention: Nabilone Comparator: Placebo, no treatment, or active alternative treatments Outcomes: Clinical effectiveness (e.g. reduced nausea, reduced vomiting, change…	Not reported	Not specifically defined but say; "Nabilone is a synthetic cannabinoid analog of THC1 and is approved for use in Canada for the treatment of severe nausea and vomiting associated with chemotherapy in adults over the age of 18 years." and "nabilone has the potential to be used ‘off-label’ for a number of conditions, for example, in the management of nausea and vomiting attributed to factors other …	Introduction	Synthetic cannabinoid (e.g. nabilone, dronabinol)	Nabilone	Placebo, no treatment, or active alternative treatments	Symptoms, signs and abnormal clinical and laboratory findings, not elsewhere classified			Nausea and Vomiting (non-chemotherapy induced) and weight loss due to a medical condition (such as anorexia, HIV, etc.)	Not defined	Mixed (adults and children)	Not reported	N/A	Nausea and vomiting or weight loss	Yes	Yes	SIGN50 Checklist	4	253	1-191	Various (specify in column Ak)	RCT, Retrospective cohort study and case reports	Adults (18+)	Authors' text	only 1 RCT	Post-operative nausea and vomiting (post abdominal hysterectomy)	Nabilone	Metoclopramide				Post-operative Nausea and Vomiting	Reported study-by-study without synthesizing results	The included RCT8 found no statistical difference in the clinical effectiveness of nabilone and metoclopramide in preventing post-operative nausea (23% with nabilone versus 30% with metoclopramide; P > 0.05) and vomiting (15% with nabilone versus 22% with metoclopramide; P > 0.05) following hysterectomy (Appendix 4, Table 5).	One low quality RCT and one low quality cohort study assessed the clinical effectiveness of nabilone in the treatment of non-chemotherapy associated nausea and vomiting or weight loss related to medical conditions, respectively. While both studies supported the use of nabilone for these indications, they had multiple limitations that potentially compromised their internal validity. This makes it …
1962																																						Authors' text	only 1 RCT	Post-operative nausea and vomiting (post abdominal hysterectomy)	Nabilone	Metoclopramide				Patient ratings of nausea and vomiting using visual analog scales (VAS)	Reported study-by-study without synthesizing results	Patient ratings of nausea and vomiting using visual analog scales (VAS) were also numerically similar between groups and did not differ statistically.
SIGN-Cancer pain	Unpublished Guideline with SR	SIGN	Welsh, J	2008	UK	NA	Government	This guideline provides recommendations based on current evidence for best practice in the management of pain in adult patients who have cancer. The guideline includes advice mainly concerning pain secondary to the cancer, but many of the principles outlined are applicable to coexisting painful conditions and pain secondary to treatment of the cancer. It excludes the treatment of pain in children…	Mixed pharmaceutical and CAM interventions (cannabis included)	Cochrane Database of Systematic Reviews, Cochrane Controlled Trials Register, CINAHL, embase, Medline, NeeD, and PsycINFO, AMED	8	1997 – june 2007	Searches were all initially limited to literature specific to cancer pain. In some areas (eg side effects of drugs, dose calculations for opioids) searches were later extended to include non-cancer pain.	Not reported	Not defined	Not defined	Not reported	From Results: THC and intramuscular levonantradol, Benzopyranoperidine, smoked cannabis	Not defined	Neoplasms			Cancer Pain	Not defined	Not reported	Not reported	NA	Pain	No	No	NR	3	NR	NR	Various (specify in column Ak)	SR and RCTs	Not reported	Authors' text	Narrative Synthesis - 2 RCTs	HIV associated sensory neuropathy and MS	Smoked Cannabis and THC (Oromucosal spray)	placebo	Neuropathic Pain		Favours intervention			Two RCTs suggest that cannabinoids may be useful in the treatment of neuropathic pain in certain conditions.143,144	Cannabinoids are not recommended for the treatment of cancer pain.
SIGN-Cancer pain																																						Authors' text	1 RCT	HIV associated sensory neuropathy	Smoked Cannabis	placebo	Neuropathic Pain		Reported study-by-study without synthesizing results			One indicated that smoked cannabis reduced chronic neuropathic pain from human immunodeficiency virus associated sensory neuropathy.143
SIGN-Cancer pain																																						Authors' text	1 RCT	MS	THC (Oromucosal spray)	placebo	Central Neuropathic Pain		Reported study-by-study without synthesizing results			The other found 1+ that an oromucosal spray containing THC and cannabidiol reduced central pain in multiple sclerosis.144
ASCO	Published Guideline with SR	Journal of Clinical Oncology	Paice, JA	2016	USA	NA	Non-profit/academic	To provide guidance to clinicians on the effectiveness of treatment options for pain in adults with a history of cancer	Various pharmaceutical interventions (cannabis being one)	PubMed library	1	2014-11-05	Articles were selected for inclusion in the systematic review of the evidence if they: Included adult cancer survivors at risk of or with chronic pain, although literature on chronic pain in other adult populations was also considered because of the paucity of evidence in cancer survivors Considered either cancer pain or noncancer pain Investigated the efficacy or harms of pharmacologic or nonpha…	Protocol mentioned, but no link or registration # reported	As of this writing, 23 states and the District of Columbia allow for medical cannabis, although it is illegal on the federal level. Currently, there is insufficient evidence to recommend medical cannabis for first-line management of chronic pain in cancer survivors. However, evidence suggests it is worthy of consideration as an adjuvant analgesic or in the management of refractory pain conditions	Discussion	Various types	Cannabis/cannabinoids according to state law	Not defined				Cancer Pain	Clinical	Adults (18+)	Not reported	N/A	Pain	Yes	Yes	AMSTAR for SRs; Design elements such as blinding, allocation concealment, placebo control, intention to treat, funding sources, and so forth, were assessed for randomized controlled trials (RCTs). Methodologic criteria assessed for other study designs included type of data collection, sampling method, and conflicts of interest.	4	NR	NR	Various (specify in column Ak)	SR and RCTs	Adults (18+)	Direction of effect	1 study	Cancer	Sativex	Placebo	Other (specify in AZ)	Chronic Pain (pain NRS score)	Reported study-by-study without synthesizing results	Worsening in Nausea and Vomiting	Reported study-by-study without synthesizing results	Adjusted mean treatment difference in pain NRS score from placebo: Sativex: 0.67 (p=0.014) Reduction of more than 30% from baseline pain NRS score: OR compared to placebo: Sativex = 2.81 (95% CI 1.22- 6.50) p=0.006 Also states "Similarly, cannabinoids were reported to provide statistically significant analgesic effect in four systematic reviews,29-32 one RCT,34 and one observational study."	Recommendation 2.9: Clinicians may follow specific state regulations that allow access to medical cannabis or cannabinoids for patients with chronic pain after a consideration of the potential beneï¬ ts and risks of the available formulations. (Evidence-based; Benefits outweigh harms; Evidence quality: intermediate; Strength of recommendation: moderate)... Relating to cannabionoids: Overall, the…
CADTH-Jan 5	Unpublished SR	CADTH	Staples, H	2018	Canada	N/A	No funding	The objective of this report was to review the evidence base for the use of cannabinoids in the treatment of behavioural symptoms in adults with dementia.	Soley focused on medical cannabis	Ovid Medline, Embase,PubMed, The Cochrane Library, University of York Centre for Reviews and Dissemination(CRD) databases and a focused Internet search.	6	published between January1, 2012 and November 29, 2017	Population: Adults with dementia Intervention: Cannabinoids (e.g., nabilone) Comparator Q1: Other cannabinoids, no treatment, placebo Q2: Not applicable Outcomes: Q1: Clinical effectiveness (e.g.,improvement or reduction in behavioural symptoms, especially agitation and aggression),safety Q2: Evidence-based guidelines Study Designs: HTA/systematic reviews/meta-analyses, randomized controlled tria…	Not reported	Not specifically defined, but they state: "To date, two oral synthetic cannabinoids have been m arketed in Canada: nabilone 4 and dronabinol,5 the latter of which was discontinued in 2012.5,6 Dronabinol had been indicated for the treatment of AIDS-related anorexia and severe nausea and vomiting from cancer chemotherapy.7 Nabilone is indicated for the treatment of severe nausea and vomiting from c…	Introduction	Various types	Cannabinoids (e.g., nabilone)	Other cannabinoids, no treatment, placebo	Mental and behavioural disorders			Dementia	Not defined	Adults (18+)	Not reported	N/A	Behavrioural symtpoms of Dementia	Yes	No	AMSTAR and Downs and Black	4	202	NR	Various (specify in column Ak)	SR and RCTs	Adults (18+)	Authors' text	1 study	Alzheimer's Dementia	THC	Placebo				Static balance	Reported study-by-study without synthesizing results	Following THC administration, increased body sway was observed compared with placebo on the outcomes of static balance (eyes closed condition) and dynamic balance (during preferred speed walking). Increased stride length was observed for gait (during preferred speed walking).	In this report, the clinical effectiveness of cannabinoids for the treatment of behavioural symptoms in adults with dementia was examined within an evidence base consisting of two systematic reviews of eight unique studies and two randomized cross -over trials. Dronabinol – which was dis continued from the Canadian market in 2012 5 – was the most commonly-studied drug and was associated with redu…
CADTH-Jan 5																																						Authors' text	1 study	Alzheimer's Dementia	THC	Placebo				Dynamic balance	Reported study-by-study without synthesizing results	^
CADTH-Jan 5																																						Authors' text	1 study	Alzheimer's Dementia	THC	Placebo				Stride length	Reported study-by-study without synthesizing results	^
CADTH-Oct 15	Unpublished SR	CADTH Rapid Response Report	CADTH	2015	Canada	N/A	Not reported	The purpose of this Rapid Response report is to summarize the evidence of clinical efficacy and harms associated with evidence of efficacy and safety of long-term nabilone use in adult populations with PTSD and other chronic conditions.	Soley focused on medical cannabis	Embase, PubMed, The Cochrane Library, University of York Centre for Reviews and Dissemination (CRD) databases, Canadian and major international health technology agencies	4	published between January 1, 2010 and September 18, 2015	Population: Adults taking nabilone Intervention: Long-term (≥1 month) nabilone Comparator: Short-term (<1 month) use, placebo, no comparator (for safety) Outcomes: Continued clinical effectiveness with long term use, change in adverse effects over time (such as headache, dizziness, drowsiness, feeling “high”, weakness, lack of co-ordination, depressed mood, dry mouth, difficulty concentrating), s…	Not reported	Not specifically defined, but they state: Nabilone is a synthetic cannabinoid analog of THC3 and is approved for use in Canada for the treatment of severe nausea and vomiting associated with chemotherapy in adults over the age of 18 years...However, nabilone has also been used off-label for the management of nightmares associated with PTSD5 and for other conditions, such as non-cancer related pai…	Introduction	Synthetic cannabinoid (e.g. nabilone, dronabinol)	Nabilone	placebo, or no comparator (for safety)	Mental and behavioural disorders			PTSD and other chronic conditions (not defined in methods - in results these include: fibromyalgia, chronic pain, spasticity related pain, MS, peripheral neuropathic pain, spinal cord injury)	Not defined	Adults (18+)	Not reported	N/A	Various: Nightmares, pain	Yes	No	AMSTAR tool (SRs) and Downs and Black Checklist (for RCTs)	5	146	NR	Various (specify in column Ak)	1 Systematic review and 4 RCTs	Adults (18+)	Authors' text	1 study	PTSD	Nabilone	Placebo				Clinician-Administered PTSD Scale Recurring and Distressing Dream scores	Reported study-by-study without synthesizing results	Statistically significant improvements in Clinician-Administered PTSD Scale Recurring and Distressing Dream scores and in scores on the General Well Being Questionnaire were observed.	Based on evidence from one systematic review and four small RCTs, nabilone appeared to be safe and efficacious for the treatment of PTSD-associated nightmares, and for pain and spasticity for up to nine weeks of treatment. However, evidence of safety and efficacy beyond nine weeks is currently lacking. Patients with PTSD reported improvements in distressing nightmares and well-being while undergo…
CADTH-Oct 15																																						Authors' text	1 study	PTSD	Nabilone	Placebo				General Well Being Questionnaire	Reported study-by-study without synthesizing results	^
CADTH-Oct 15																																						Authors' text	1 study	PTSD	Nabilone	Placebo	Pain		Reported study-by-study without synthesizing results	Clinician Global Impression of Change	Reported study-by-study without synthesizing results	The difference between placebo and nabilone on the Clinician Global Impression of Change was not statistically significant.
CADTH-Oct 15																																						Authors' text	1 study	MS	Nabilone (+Gabapentin)	Placebo (+gabapentin)	Peripheral Neuropathic Pain		Reported study-by-study without synthesizing results			It was concluded that nabilone was effective as add on therapy to gabapentin for the management of pain in MS.
CADTH-Oct 15																																						Authors' text	1 study	Diabetic peripheral neuropathic pain	Nabilone	Placebo						The authors concluded that nabilone was effective for the management of diabetic peripheral neuropathic pain and improved quality of life and sleep (Table A6, Appendix 4).
CADTH-Oct 15																																						Authors' text	1 study	Diabetic peripheral neuropathic pain	Nabilone	Placebo				Quality of Sleep	Reported study-by-study without synthesizing results	^
CADTH-Oct 15																																						Authors' text	1 study	Spinal cord injury and spasticity	Nabilone	Placebo				Spasticity	Reported study-by-study without synthesizing results	The authors concluded that the results suggested nabilone improved spasticity, but that larger studies with longer treatment duration were needed (Table A6, Appendix 4).
KCE	Unpublished Guideline with SR	The Belgian Health Care Knowledge Centre	Verleye, L	2012	Belgium	N/A	Not reported	The present report aims to formulate, on the basis of scientific evidence, recommendations relative to the prevention and treatment of adverse events of chemotherapy and/or radiotherapy. The report is intended to be used by health care professionals involved in the supportive care of cancer patients across the cancer care continuum, more specifically medical oncologists, radiation oncologists, su…	Mixed pharmaceutical and CAM interventions (cannabis included)	OVID Medline and PreMedline, EMBASE, Cochrane Database of Systematic Reviews, Database of Abstracts of Reviews of Effects (DARE) and Health Technology Assessment (HTA) database, CENTRAL - Additionally the following websites were searched for evidence-based guidelines: National Guideline Clearinghouse , American Society of Clinical Oncology (ASCO) , Cancer Care Ontario , Haute Autorité de Santé …	15	Searches were run between December 2011 and August 2012	To be finally included the systematic review had to:  address the treatment or prevention of chemotherapy - and/or radiotherapy-related adverse events in patients receiving cancer treatment for the selected topics and interventions (for details see Table 2);  evaluate the selected critical and important outcomes (see Table 1);  have searched MEDLINE and at least one other electronic database; …	Not reported	Not defined	Not defined	Not reported	Cannabinoids	Not defined	Neoplasms			Chemotherapy Related Adverse events - Eight adverse events were selected: (1) oral complications (mucositis, candidiasis), (2) neutropenia and neutropenic fever, (3) gastrointestinal complications (nausea and vomiting, diarrhoea), (4) infertility, (5) neuropathy, (6) radioproctitis, (7) skin toxicity, and (8) cardiac toxicity.	Not defined	Not reported	Not reported	N/A	nausea and vomiting	Yes	Yes	AMSTAR instrument, Cochrane Collaboration’s tool for assessing risk of bias and GRADE	4	NR	NR	Various (specify in column Ak)	SRs and RCTs	Adults (18+)	Authors' text	1 study	Nausea and Vomiting due to chemotherapy	whole-plant cannabis- based medicine (CBM) containing delta-9- tetrahydrocannabinol and cannabidiol (+standard therapies)	placebo				complete response to anti-emetic therapy	Reported study-by-study without synthesizing results	complete response to anti-emetic therapy on day 1 was not significantly different (RD = 4.8%; 95%CI -36.7% to 42.1%), but for the overall period, complete respons was significantly more frequent in the CBM group as compared to the control group (RD = 49%; 95%CI 1% to 75%).	There are indications that cannabinoids are more effective in controlling nausea and vomiting in patients receiving chemotherapy compared to placebo (Chang 1979, Frytak 1979, Orr 1980, Chang 1981, Meiri 2007, Duran 2010; low level of evidence
KCE																																						Authors' text	1 study	Nausea and Vomiting due to chemotherapy	whole-plant cannabis- based medicine (CBM) containing delta-9- tetrahydrocannabinol and cannabidiol (+standard therapies)	placebo				Absence of delayed nausea	Reported study-by-study without synthesizing results	No significant differences were found for the absence of delayed nausea (RD = 34.9% (95%CI -10.8% to 66.3%) or ‘significant delayed nausea’ (RD = 27.0%; 95%CI -18.0% to 59.7%).
KCE																																						Authors' text	1 study	Nausea and Vomiting due to chemotherapy	whole-plant cannabis- based medicine (CBM) containing delta-9- tetrahydrocannabinol and cannabidiol (+standard therapies)	placebo				Significant delayed nausea	Reported study-by-study without synthesizing results	^
KCE																																						Authors' text	1 study	Nausea and Vomiting due to chemotherapy	whole-plant cannabis- based medicine (CBM) containing delta-9- tetrahydrocannabinol and cannabidiol (+standard therapies)	placebo				Absence of delayed emesis	Reported study-by-study without synthesizing results	Significant differences were found for the absence of delayed emesis (RD = 49% (95%CI 1.0% to 75.0%).
KCE																																						Authors' text	1 study	Nausea and Vomiting due to chemotherapy	whole-plant cannabis- based medicine (CBM) containing delta-9- tetrahydrocannabinol and cannabidiol (+standard therapies)	placebo				Quality of Life	Reported study-by-study without synthesizing results	No differences in quality of life measurements in the two groups were found (no patients in either group scored >108 in the FLIE questionnaire)
KCE																																						Authors' text	1 study	Nausea and Vomiting due to chemotherapy	Dronabinol (+ standard prechemotherapy regimen of dexamethasone (20 mg) and ondansetron (16 mg).)	Placebo (+ standard prechemotherapy regimen of dexamethasone (20 mg) and ondansetron (16 mg).)				Total response to anti-emetic chemotherapy	Reported study-by-study without synthesizing results	No significant difference was found for total response to anti-emetic chemotherapy between dronabinol (54%) and placebo (20%).
KCE																																						Authors' text	1 study	Nausea and Vomiting due to chemotherapy	Dronabinol (+ standard prechemotherapy regimen of dexamethasone (20 mg) and ondansetron (16 mg).)	Placebo (+ standard prechemotherapy regimen of dexamethasone (20 mg) and ondansetron (16 mg).)				Nausea absence	Reported study-by-study without synthesizing results	Nausea absence was significantly higher in the dronabinol group (71%) than in the placebo group (15%).
KCE																																						Authors' text	1 study	Nausea and Vomiting due to chemotherapy	Dronabinol (+ standard prechemotherapy regimen of dexamethasone (20 mg) and ondansetron (16 mg).)	Placebo (+ standard prechemotherapy regimen of dexamethasone (20 mg) and ondansetron (16 mg).)				Vomiting and/or retching (mean number of episodes per week)	Reported study-by-study without synthesizing results	For vomiting and/or retching, no statistically significant difference was observed among groups for mean number of episodes of vomiting and/or retching.
KCE																																						Authors' text	1 study	Nausea and Vomiting due to chemotherapy	Dronabinol (+ standard prechemotherapy regimen of dexamethasone (20 mg) and ondansetron (16 mg).)	Placebo (+ standard prechemotherapy regimen of dexamethasone (20 mg) and ondansetron (16 mg).)				Patient's wellness (ECOG)	Reported study-by-study without synthesizing results	Regarding the patients’ wellness measured by the Eastern Cooperative Oncology Group (ECOG) performance status, the overall mean change from baseline to end point did not differ much from zero: 0.058 for dronabinol vs. 0.077 for placebo (p=0.036 in favour of placebo).
KCE																																						Authors' text	1 study	Nausea and Vomiting due to chemotherapy	Dronabinol (+ standard prechemotherapy regimen of dexamethasone (20 mg) and ondansetron (16 mg).)	Placebo (+ standard prechemotherapy regimen of dexamethasone (20 mg) and ondansetron (16 mg).)				Quality of Life	Reported study-by-study without synthesizing results	Improvement from baseline in quality of life (measured by the McCorkle Symptom Distress Scale, MSDS) was observed only in patients receiving dronabinol (mean change from baseline –2.0 ± 4.2).
KCE																																						Range of effects with Cis		Nausea and Vomiting due to chemotherapy	Dronabinol (+ standard prechemotherapy regimen of dexamethasone (20 mg) and ondansetron (16 mg).)	Placebo (+ standard prechemotherapy regimen of dexamethasone (20 mg) and ondansetron (16 mg).)				At least one adverse event	No statistical difference between groups
KCE																																						Range of effects with Cis		Nausea and Vomiting due to chemotherapy	Dronabinol (+ standard prechemotherapy regimen of dexamethasone (20 mg) and ondansetron (16 mg).)	Placebo (+ standard prechemotherapy regimen of dexamethasone (20 mg) and ondansetron (16 mg).)				Severe adverse events	No statistical difference between groups
KCE																																						Range of effects with Cis		Nausea and Vomiting due to chemotherapy	Dronabinol (+ standard prechemotherapy regimen of dexamethasone (20 mg) and ondansetron (16 mg).)	placebo				At least one treatment emerging AE	Favours intervention
KCE																																						Range of effects with Cis		Nausea and Vomiting due to chemotherapy	Dronabinol (+ standard prechemotherapy regimen of dexamethasone (20 mg) and ondansetron (16 mg).)	placebo				At least one serious AE	Favours control
NICE-1	Unpublished Guideline with SR	NICE	Longson, D	2017	NR	NR	Not reported	This short clinical guideline aims to improve the care of adults with neuropathic pain by making evidence-based recommendations on the pharmacological management of neuropathic pain outside of specialist pain management services. A further aim is to ensure that people who require specialist assessment and interventions are referred appropriately and in a timely fashion to a specialist pain manage…	Various pharmaceutical interventions (cannabis being one)	CINAHL (EBSCO) , Cochrane Central Register of Controlled Trials – CENTRAL (Wiley) , Cochrane Database of Systematic Reviews – CDSR (Wiley), Database of Abstracts of Reviews of Effects – DARE (CRD up to May 2009 and Wiley after May 2009) , EMBASE (Ovid) , Health Economic Evaluations Database – HEED (Wiley) , Health Technology Assessment Database – HTA (CRD up to May 2009 and Wiley after May 2009) …	10	conducted between 17th and 31st July 2012. In addition search filters were also applied to separately identify economic evaluations and quality of life evidence. These searches were conducted between 23rd and 29th August 2012.	Adults with neuropathic pain... Although the scope of this guideline is to provide recommendations for pharmacological treatment in non-specialist settings, studies conducted in specialist pain clinics were also included because it was felt that extrapolating the evidence to non-specialist settings is appropriate... Table 2 lists the 43 different pharmacological treatments that were considered fo…	Protocol completed, and link and/or registration # reported	Not defined	Not defined	Plant-derived cannabinoids (e.g. THC, cannabidiol, THCV, nabiximols (e.g.Sativex))	Cannabis sativa extract	other combination therapies, monotherapy or placebo	Symptoms, signs and abnormal clinical and laboratory findings, not elsewhere classified			Neuropathic Pain	non-specialist settings (includes general practice, general community care and hospital care)	Adults (18+)	Not reported	N/A	pain	Yes	Yes	NICE Methodology Checklist for Randomised Controlled Trials	4	258	NR	RCTs or quasi-RCTs	N/A	Adults (18+)	Authors' text	Unclear how many studies have been synthesized - narrative synthesis	Pain	Cannabis sativa extract	placebo	Neuropathic Pain		Favours intervention			the results from the analyses showed that cannabis sativa and capsaicin patch may reduce pain compared with placebo, but both drugs appeared consistently worse at reducing pain than other drugs.- **apparent through NMA	NR - Recommendations: Do not start the following to treat neuropathic pain in non-specialist settings, unless advised by a specialist to do so: cannabis sativa extract; the results from the analyses showed that cannabis sativa and capsaicin patch may reduce pain compared with placebo, but both drugs appeared consistently worse at reducing pain than other drugs... Cannabis sativa extract – there i…
NICE-1																																						Authors' text	Unclear how many studies have been synthesized - narrative synthesis, network MA	Pain	Cannabis sativa extract	"other drugs"	Neuropathic Pain		Favours control			^^
NICE-1																																						Authors' text	2 studies	Central neuropathic pain	Cannabis sativa extract	Placebo				Patient Reported global improvement	Reported study-by-study without synthesizing results	There was very little evidence reporting on patient-reported global improvement in central neuropathic pain. Low and very-low quality evidence from 2 small studies suggests that cannabis sativa and duloxetine may be better than placebo at follow-up periods of less than 12 weeks. However, confidence in the results is low and data were only available on a limited number of drugs.
NICE-1																																						Authors' text	2 studies	Pain	Cannabis sativa extract	Placebo				Sleep (at 4 weeks)	Reported study-by-study without synthesizing results	Low- quality evidence from 2 studies shows that cannabis sativa may be better than placebo at improving sleep at 4 weeks and pregabalin may be better than placebo at improving sleep at 12 weeks, but it is not clear if this is clinically significant. However, data were only available on a limited number of drugs.
NICE-1																																						Authors' text	2 studies	Pain	Cannabis sativa extract	Pregabalin				Sleep (at 12 weeks)	Reported study-by-study without synthesizing results	^^
NICE-1																																						Meta-analysis	1 study	Peripheral Neuropathic Pain	Cannabis sativa extract	Placebo				withdrawal due to adverse effects	Favours intervention	appendix H
NICE-1																																						Meta-analysis	1 study	Peripheral Neuropathic Pain	Cannabis sativa extract	Amitriptyline				withdrawal due to adverse effects	No statistical difference between groups	appendix H
NICE-1																																						Meta-analysis	1 study	Peripheral Neuropathic Pain	Cannabis sativa extract	Placebo				30% pain relief - 28 +/- 7 days	No statistical difference between groups	appendix H table 30
NICE-1																																						Meta-analysis	1 Study	Central neuropathic pain	Cannabis sativa extract	Placebo				Patient-reported global improvement (at least moderate improvement) (28 +/-7 days)	No statistical difference between groups	appendix I - Summary GRADE profile 1a
NICE-1																																						Meta-analysis	1 study	Central neuropathic pain	Cannabis sativa extract	Placebo				Sleep interference on normalised 10-point scale (28 +/- 7d)	Favours intervention	appendix I - Summary GRADE profile 2a
NICE-1																																						Network meta-analysis	1 study	Central neuropathic pain	Cannabis sativa extract	Placebo				withdrawal due to adverse effects	No statistical difference between groups	appendix I table 6
NICE-1																																						Meta-analysis	1 study	Central neuropathic pain	Cannabis sativa extract	Placebo				pain (continuous) - 28 +/-7 days	Favours intervention	appendix I - table 17
NICE-1																																						Network meta-analysis	2 studies	Pain	Cannabis sativa extract	Placebo				Dizziness or Vertigo	Favours intervention	appendix J - table 2
NICE-1																																						Network meta-analysis	Unclear	Pain	Cannabis sativa extract	Amitriptyline				Dizziness or Vertigo	No statistical difference between groups	appendix J - table 2
NICE-1																																						Meta-analysis	2 studies	Pain	Cannabis sativa extract	Placebo				somnolence (including drowsiness and sedation)	No statistical difference between groups	appendix J - table 7
NICE-1																																						Meta-analysis	2 studies	Pain	Cannabis sativa extract	Placebo				fatigue (or tiredness)	No statistical difference between groups	appendix J - table 12
NICE-1																																						Network meta-analysis	2 studies	Pain	Cannabis sativa extract	Placebo				nausea	No statistical difference between groups	appendix J - table 27
NICE-1																																						Network meta-analysis	unclear	Pain	Cannabis sativa extract	Amitriptyline				nausea	No statistical difference between groups	appendix J - table 27
NICE-1																																						Meta-analysis	2 studies	Pain	Cannabis sativa extract	Placebo				vomiting	No statistical difference between groups	appendix J - table 32
NICE-1																																						Meta-analysis	1 study	Pain	Cannabis sativa extract	Placebo				burning pain	No statistical difference between groups	appendix J - table 41
NICE-1																																						Meta-analysis	1 study	Pain	Cannabis sativa extract	Placebo				cognitive impairment	No statistical difference between groups	appendix J - table 72
NICE-1																																						Meta-analysis	1 study	Pain	Cannabis sativa extract	placebo				mood disturbance	No statistical difference between groups	appendix J - table 76
NICE-1																																						Meta-analysis	2 studies	Pain	Cannabis sativa extract	placebo				dry mouth	Favours intervention	appendix J - table 81
NICE-1
NICE-2	Unpublished Guideline with SR	NA	Cooper, P	2014	NA	UK	Government	This guideline replaces NICE clinical guideline 8 (2003) and covers diagnosis, information and support, treatment of relapse and management of MS-related symptoms. The guideline does not address all symptoms and problems associated with MS... The guideline does not address the use of disease-modifying treatments; there are NICE technology appraisals about these treatments. The guideline is aimed …	Mixed pharmaceutical and CAM interventions (cannabis included)	MEDLINE, Embase, and the Cochrane Library, The NHS Economic Evaluation Database (NHS EED), the Health Economic Evaluations Database (HEED) and Health Technology Assessment (HTA) database	6	were updated for the final time on 3rd February 2014	The key population inclusion criterion was:  Adults who have a diagnosis of MS or possible MS, or are having investigations for MS. The key population exclusion criterion was:  Children and young people under the age of 18 years who have a diagnosis of MS or possible MS, or are being investigated for MS. Randomised trials, non-randomised trials, and observational studies (including diagnostic o…	Protocol completed, and link and/or registration # reported	Not defined	Not defined	Plant-derived cannabinoids (e.g. THC, cannabidiol, THCV, nabiximols (e.g.Sativex))	sativex	Best medical management  Placebo  Oral baclofen  Tizanidine (Zanaflex)  Gabapentin (Neurontin)  Pregabalin (Lyrica)  Benzodiazepines (Diazepam, clonazepam)  Dantrolene sodium (Dantrium)  Sativex  Botulinum toxin (Azzalure, Bocouture, Botox, Dysport, Vistabel, Xeomin)  Intrathecal baclofen  phenol	Diseases of the nervous system			MS		Adults (18+)		NA	From results: spasticity	Yes	Yes	Grading of Recommendations Assessment, Development and Evaluation (GRADE) toolbox	6	unclear	NR	RCTs or quasi-RCTs		Adults (18+)	Meta-analysis	Narrative Synthesis - 3 studies	MS	Sativex	Placebo				Spasticity (Ashworth Scale)	No statistical difference between groups	Three studies 43,44,258 assessed the effects of sativex and placebo on spasticity, as measured by the Ashworth scale... Taken together, their data suggested no clear effect [Collin 2007: mean difference -0.11(-0.29, 0.07); Collin 2010: mean difference -0.16(-1.9, 1.58); Wade 2004:mean difference 0.22(-0.5, 0.94)], although the validity of this finding is suspect in view of the inappropriate analy…	Do not offer Sativexk to treat spasticity in people with MS because it is not a cost effective treatment.
NICE-2																																						Meta-analysis	Narrative Synthesis - 2 studies	MS	Sativex	Placebo				NRS Score	Favours intervention	Two studies 43,44 assessed the effects of sativex and placebo on spasticity, as measured by the NRS score. Taken together, their parametric data analyses suggested a possible benefit for sativex [Collin 2007: mean difference -0.52(-1.0, -0.04); Collin 2010: mean difference - 0.23(-3.21, 2.75)], although the validity of this finding is suspect in view of the inappropriate analysis.
NICE-2																																						Meta-analysis	Narrative Synthesis - 2 studies	MS	Sativex	Placebo				Function in activities of daily living (Barthel Index)	Favours control	Two studies 43,44,258 assessed the effects of sativex and placebo on function in activities of daily living, as measured by the Barthel Index (BI). Taken together, their parametric data analyses suggested possible harm from sativex [Wade 2004: mean difference -0.47(- 1.0 to 0.06); Collin 2010: mean difference -0.15 (-2.01, 1.71)], although the validity of this finding is suspect in view of the in…
NICE-2																																						Meta-analysis	Narrative Synthesis - 2 studies	MS	Sativex	Placebo				Spasm Severity NRS	No statistical difference between groups	Two studies 43,44 assessed the effects of sativex and placebo on function spasm severity, as measured by the spasm severity NRS. Taken together, their parametric data analyses suggested no effect [Collin 2007: mean difference -0.17(-0.39 to 0.05); Collin 2010: mean difference -0.01 (-32.5, 32.48)], although the validity of this finding is suspect in view of the inappropriate analysis.
NICE-2																																						Meta-analysis	Narrative Synthesis - 2 studies	MS	Sativex	Placebo				Number of patients with 30% improvement in NRS (spasm severity)	Favours intervention	Very low quality evidence from two RCTs comprising 519 participants showed that sativex was clinically effective compared to placebo in terms of numbers with at least 30% improvement in NRS, with serious imprecision
NICE-2																																						Meta-analysis	Narrative Synthesis - 2 studies	MS	Sativex	Placebo				Nausea	No statistical difference between groups	Low quality evidence from 2 RCTs comprising 194 participants showed that there was no difference in clinical effectiveness between sativex and placebo in terms of numbers with nausea, with very serious imprecision.
NICE-2																																						Meta-analysis	Narrative Synthesis - 2 studies	MS	Sativex	Placebo				Somnolence	No statistical difference between groups	Moderate quality evidence from 2 RCTs comprising 194 participants showed that sativex was clinically harmful compared to placebo in terms of numbers with somnolence, with serious imprecision.
NICE-2																																						Meta-analysis	Narrative Synthesis - 2 studies	MS	Sativex	Placebo				Timed 10m walk	No statistical difference between groups	Moderate quality evidence from two RCTs comprising 277 participants showed that sativex used in a population of positive responders was clinically effective compared to placebo in terms of timed 10m walk (if ambulatory), with serious imprecision.
NICE-2																																						Meta-analysis	Narrative Synthesis - 2 studies	MS	Sativex	Placebo				Patient Global Impression of Improvement	Favours intervention	High quality evidence from two RCTs comprising 277 participants showed that sativex used in a population of positive responders was clinically effective compared to placebo in terms of patient global impression of improvement, with no imprecision.
NICE-2																																						Meta-analysis	1 study	MS	Sativex	Placebo				EQ-5D health state index (higher better)	No statistical difference between groups	from table 46
NICE-2																																						Meta-analysis	1 study	MS	Sativex	Placebo				EQ-5D health status VAS (higher better)	No statistical difference between groups	from table 46
NICE-2																																						Meta-analysis	1 study	MS	Sativex	Placebo				MSQoL54 phys health (higher better)	No statistical difference between groups	from table 46
NICE-2																																						Meta-analysis	1 study	MS	Sativex	Placebo				MSQoL54 mental health (higher better)	No statistical difference between groups	from table 46
NICE-2																																						Meta-analysis	1 study	MS	Sativex	Placebo				subject global impression of improvement	No statistical difference between groups	from table 46
NICE-2																																						Meta-analysis	1 study	MS	Sativex	Placebo				Adverse events leading to withdrawal	No statistical difference between groups	from table 46
NICE-2																																						Meta-analysis	1 study	MS	Sativex	Placebo				Weakness	No statistical difference between groups	from table 46
NICE-2																																						Meta-analysis	1 study	MS	Sativex	Placebo				Timed 10m walk		Moderate quality evidence from one RCT comprising 140 participants showed that sativex was clinically effective compared to placebo in terms of timed 10m walk (if ambulatory) , with serious imprecision.
NICE-2																																						Meta-analysis	1 study	MS	Sativex	Placebo				Responders (at least 30% improvement in NRS)	Favours intervention	from table 47
NICE-2																																						Meta-analysis	1 study	MS	Sativex	Placebo				Carer perception of global improvement in impression of function	No statistical difference between groups	from table 47
NICE-2																																						Meta-analysis	1 study	MS	Sativex	Placebo				Physician perception of global improvement	Favours intervention	from table 47
NICE-2																																						Meta-analysis	1 study	MS	Sativex	Placebo				Improvement in Barthel Index	Favours intervention	from table 47
NICE-2																																						Meta-analysis	1 study	MS	Sativex	Placebo				EQ-5D health state index (higher better)	No statistical difference between groups	from table 47
NICE-2																																						Meta-analysis	1 study	MS	Sativex	Placebo				EQ-5D health status VAS	No statistical difference between groups	from table 47
NICE-2																																						Meta-analysis	1 study	MS	Sativex	Placebo				SF36 Phys Function	No statistical difference between groups	from table 47
NICE-2																																						Meta-analysis	1 study	MS	Sativex	Placebo				SF36 mental health	No statistical difference between groups	from table 47
NICE-2																																						Meta-analysis	1 study	MS	Sativex	Placebo				Nausea	No statistical difference between groups	from table 47
NICE-2																																						Meta-analysis	1 study	MS	Sativex	Placebo				Somnolence	No statistical difference between groups	from table 47
NICE-2																																						Meta-analysis	1 study	MS	Sativex	Placebo				Fatigue Severity Score	No statistical difference between groups	Aragona 20099 compared the effects of sativex and placebo on fatigue, as measured by the Fatigue Severity Scale (FSS). The data were skewed and so non parametric analysis was used, although means and standard deviations were presented. The sativex group had a mean (sd) of 5.58 (1.5) on the FSS compared to 5.89(0.93) for the placebo group (p=0.88)
NICE-2																																						Meta-analysis	1 study	MS	Sativex	Placebo				VAS QoL	No statistical difference between groups	Aragona 20099 compared the effects of sativex and placebo on the visual analogue scale on health- related quality of life (VASQoL). The data were skewed and so non parametric analysis was used, although means and standard deviations were presented. The sativex group had a mean (sd) of 3.65 (2.29) on the VASQoL compared to 4.00(2.00) for the placebo group (p=0.31)
NICE-2																																						Meta-analysis	1 study	MS	Sativex	Placebo				MSIS physical and psychological	No statistical difference between groups	Aragona 20099 compared the effects of sativex and placebo on the Multiple Sclerosis Impact Scale (MSIS) physical and psychological scales. The data were skewed and so non parametric analysis was used, although means and standard deviations were presented. The sativex group had a mean (sd) of 63 (16.8) on the MSIS physical scale compared to 62.3(13.1) for the placebo group (p=0.57). The sativex gr…
NICE-2																																						Meta-analysis	1 study	MS	Sativex	Placebo				Motricity index –arm and leg	No statistical difference between groups	. Their data suggested no clear effect for arm function [mean difference 1.30 (-7.47, 10.07)] and a trend for an effect favouring sativex for leg function [mean difference 3.86(-0.06, 7.78)], although the validity of these findings is suspect in view of the inappropriate analyses.
NICE-2																																						Meta-analysis	1 study	MS	Sativex	Placebo				Guys neurological disability scale	Favours control	They reported their results using parametric statistics, although this was inappropriate given the ordinal nature of this measure. Their data suggested significant harm from sativex [mean difference 1.81 (0.03, 3.59)], although the validity of these findings is suspect in view of the inappropriate analyses.
[truncated: 21 more columns]

## Sheet: AMSTAR
Reviewer	RefID	1. Did the research questions and inclusion criteria for the review include the components of PICO? (Y, N)	2. Did the report of the review contain explicit statement that the review methods were established prior to conduct of the review? (Y, PY, N)	3. Did the review authors explain their selection of the study designs for inclusion in the review? (Y, N)	4. Did the reviewer authors use a comprehensive literature search strategy? (Y, PY, N) CRITICAL FLAW if not Y, PY	5. Did the review authors perform study selection in duplicate? (Y, N)	6. Did the review authors perform data extraction in duplicate? (Y, N)	7. Did the review authors provide a list of excluded studies and justify the exclusions? (Y, PY, N)	8. Did the review authors describe the included studies in adequate detail? (Y, PY, N)	9A. RCTS- Did authors use a satsifactory technique for assessing the risk of bias (ROB) in individual studies that were included in the review? (Y, PY, N, NA- includes only NRSI) CRITICAL FLAW if not Y, PY	9B. NRSI- Did authors use a satsifactory technique for assessing the risk of bias (ROB) in individual studies that were included in the review? (Y, PY, N, NA- includes only RCTs) CRITICAL FLAW if not Y, PY	10. Did the review authors report on the sources of funding for the included studies? (Y, N)	11A. RCTs- If meta-analysis was performed did the authors use appropriate methods for statisical combination of results? (Y,N, only NRSI, No MA) CRITICAL FLAW if not Y, PY	11B. NRSI- If meta-analysis was performed did the authors use appropriate methods for statisical combination of results? (Y,N, only RCTs, no MA) CRITICAL FLAW if not Y, PY	12. If meta-analysis was performed, did the review authors assess the potential impact of ROB in individual studies on the results of the meta-analysis or other evidence synthesis? (Y, N, No MA, No QA)	13. Did the review authors account for ROB in individual studies when intrepreting/discussing the results of the review? (Y, N, No QA) CRITICAL FLAW if not Y, PY	14. Did the review authors provide a satisfacotry explanation for, and discussion of, any heterogeneity observed in the results of the review? (Y, N)	15. Did the review authors carry out an adequate investigation of publication bias, and discuss its likely impact on the results of the review? (Y, N)	16. Did the review authors report any potential sources of conflict of interest, including any funding they received for the review? (Y, N)	How many critical flaws?	How many non-critical flaws?	Overall Appraisal (H, M, L, CL)
	12	N	PY	N	Y	Y	N	Y	Y	N	N	Y	No MA	No MA	No MA	Y	N	N	Y	1	4	L
	16	N	N	N	N	N	N	N	Y	PY	Includes only RCTs	N	No MA	No MA	No MA	Y	N	N	N	1	10	L
	22	N	N	Y	PY	Y	Y	N	Y	Y	includes only RCTS	N	No MA for cannabis	No MA for cannabis	No MA for cannabis	N	N	N	N	1	7	L
	40	N	N	N	PY	N	N	N	Y	Y	Includes only RCTs	N	No MA	No MA	No MA	Y	N	N	Y	0	9	M
	60	Y	N	N	PY	N	N	Y	Y	PY	includes only RCTs	N	Y	only RCTs	Y	PY	Y	N	Y	0	6	M
	61	Y	N	N	Y	Y	Y	N	Y	Y	includes only RCTs	N	Y	only RCTs	Y	Y	Y	Y	Y	0	4	M
	88	Y	PY	Y	N	N	N	Y	Y	includes only NRSI	N	N	No MA	No MA	No MA	N	N	N	N	2	6	CL
	107	N	N	N	N	N	N	N	Y	N	PY	N	No MA	No MA	No MA	N	N	N	Y	3	9	CL
	145	N	N	N	N	Y	Y	N	Y	Y	includes only RCTs	N	Y	RCTs only	Y	N	Y	N	Y	2	5	CL
	169	N	N	N	PY	Y	N	N	Y	N	N	N	N	N	Y	Y	N	N	Y	1	8	L
	171	Y	Y	N	Y	Y	N	N	Y	Y	includes only RCTs	N	Y	only RCTs	Y	Y	Y	Y	Y	0	4	M
	192	N	Y	Y	Y	Y	Y	N	Y	Y	Y	N	Y	MA not performed for NRSI	Y	Y	Y	N	Y	0	4	M
	193	Y	Y	N	Y	N	N	N	Y	includes only NRSI	PY	N	No MA	No MA	No MA	Y	N	N	Y	0	7	M
	198	N	Y	N	PY	Y	Y	N	Y	Y	Y	Y	N	only RCTs	Y	Y	N	N	Y	1	5	L
	208	N	N	N	PY	Y	N	N	PY	Y	N/A	N	No MA	No MA	No MA	N	N	N	N	1	9	L
	211	Y	N	N	N	Y	N	N	Y	Y	Y	N	No MA	No MA	No MA	N	N	N	N	2	7	CL
	223	Y	N	N	Y	Y	Y	N	Y	Y	includes only RCTs	Y	No MA	No MA	No MA	Y	N	N	Y	0	5	M
	224	N	N	N	PY	N	N	N	Y	Y	includes only RCTS	N	No Ma	No Ma	No Ma	Y	N	N	N	0	10	M
	227	Y	Y	N	PY	Y	Y	N	PY	Y	includes only RCTs	N	No MA	No MA	No MA	Y	N	N	Y	0	5	M
	249	Y	PY	N	Y	Y	Y	Y	Y	Y	NA includes only RCTs	Y	No MA	No MA	No MA	Y	N	N	Y	0	3	M
	257	Y	PY	N	Y	Y	Y	Y	Y	Y	NA- includes only RCTs	N	Y	no NRSI	Y	Y	Y	N	Y	0	3	M
	260	N	N	N	N	Y	Y	N	Y	Y	only RCTs	N	no MA	only RCTs	no MA	Y	Y	N	N	1	7	L
	268	Y	Y	Y	PY	Y	Y	Y	Y	Y	NA - includes only RCTs	Y	Y	NA - includes only RCTs	Y	Y	N	N	Y	0	4	M
	283	N	Y	Y	PY	Y	Y	Y	Y	Y	NA - includes only RCTs	N	Y	NA - includes only RCTs	Y	Y	Y	N	Y	0	3	M
	317	N	PY	N	PY	Y	Y	PY	Y	Y	includes only RCTs	N	No MA	only RCTs	no MA	Y	N	N	Y	0	5	M
	336	Y	PY	Y	Y	Y	Y	Y	Y	Y	includes only RCTs	Y	No MA for this question	only RCTs	No MA	Y	Y	Y	Y	0	0	H
	352	N	N	N	PY	N	N	N	Y	PY	includes only RCTs	N	N	only RCTs	No MA	Y	N	N	Y	1	9	L
	355	N	N	N	PY	Y	N	N	N	N	N	N	No MA	No MA	No MA	Y	N	N	N	1	10	L
	359	N	N	N	PY	Y	N	N	Y	Y	N	N	No MA	No MA	No MA	Y	N	N	Y	0	8	M
	366	N	PY	N	PY	Y	N	N	Y	Y	NA includes only RCTs	N	no MA	no MA	no MA	Y	N	N	N	0	9	M
	423	Y	N	N	PY	Y	Y	Y	Y	Y	includes only RCTs	N	No MA	only RCTs	No MA	Y	Y	N	N	0	5	M
	450	Y	N	N	N	N	Y	N	PY	PY	includes only RCTs	N	No MA	only RCTs	No MA	Y	N	N	N	0	8	M
	502	N	Y	N	N	Y	Y	Y	Y	Y	NA- includes only RCTs	N	No MA	NA- includes only RCTs	No MA	Y	Y	N	Y	1	4	L
	513	Y	Y	N	Y	Y	Y	Y	Y	Y	NA- includes only RCTs	N	No MA	no Ma	no MA	Y	Y	N	Y	0	3	M
	547	Y	N	N	PY	N	N	N	PY	PY	NA-includes only RCTs	N	No MA	No MA	No MA	N	N	N	N	1	9	L
	568	N	N	N	PY	N	N	Y	Y	N	NA includes only RCTs	N	N	NA includes only RCTs	Y	Y	N	N	Y	3	7	CL
	573	Y	N	N	PY	Y	Y	Y	Y	PY	includes only RCTs	Y	No MA	only RCTs	No MA	Y	Y	Y	Y	0	2	M
	593	N	N	N	PY	N	N	N	N	PY	includes only RCTs	N	No MA	only RCTs	No MAs	Y	N	N	N	0	11	M
	607	Y	N	N	PY	N	Y	N	PY	PY	NA - includes only RCTs	N	No MA	No MA	No MA	Y	Y	N	N	0	7	M
	612	Y	Y	N	PY	N	N	Y	Y	Y	NA - includes only RCTs	N	No MA	No MA	No MA	Y	N	No MA	Y	0	5	M
	615	Y	N	N	PY	N	N	N	Y	PY	NA includes only RCTs	N	Y	NA - only includes RCTs	Y	Y	Y	N	N	0	8	M
	630	Y	N	N	N	N	Y	Y	Y	Y	only RCTs	Y	No MA	only RCTs	No MA	Y	Y	no MA	N	1	4	L
	662	N	N	N	PY	N	N	N	Y	PY	NA - includes only RCTs	N	Y	NA - only RCTs	Y	Y	Y	Y	N	0	8	M
	664	N	N	N	N	Y	N	N	Y	PY	PY	N	Y	NA - only RCTs for MA	Y	Y	Y	N	Y	1	7	L
	713	Y	N	N	N	Y	Y	N	Y	PY	NA - includes only RCTs	N	N	Na - only RCTs	Y	Y	Y	Y	N	2	5	CL
	714	Y	PY	N	N	Y	Y	Y	PY	PY	includes only RCTs	N	No MA	only RCTs	No MA	Y	N	N	N	1	5	L
	789	Y	Y	N	N	Y	Y	Y	PY	N	NA - includes only RCTs	N	No MA	No MA	No MA	Y	N	N	N	2	6	CL
	816	Y	N	N	PY	Y	Y	N	Y	PY	NA - includes only RCTs	N	No MA	NA - only RCTs	No MA	Y	N	N	Y	0	6	M
	824	N	N	N	PY	N	N	N	PY	Y	only RCTs	N	No MA	only RCTs	No MA	Y	N	N	N	0	10	M
	1043	N	N	N	N	Y	Y	N	Y	N	only RCTs	Y	No MA	No MA	No MA	Y	N	N	Y	2	6	CL
	1136	Y	N	N	PY	N	N	N	PY	PY	only RCTs	N	No MA	only RCTs	No MA	N	N	N	N	1	9	L
	1138	Y	PY	N	PY	Y	Y	N	PY	PY	only RCTs	N	Y	only RCTs	Y	Y	Y	Y	Y	0	3	M
	1211	N	N	N	PY	Y	Y	N	Y	Y	only RCTs	N	Y	only RCTs	N	N	Y	N	Y	1	7	L
	1336	Y	N	Y	PY	Y	Y	N	Y	Y	NA - includes only RCTs	N	N	NA - only RCTs	N	Y	N	N	Y	1	6	L
	1370	Y	PY	N	Y	Y	Y	Y	PY	Y	includes only RCTs	N	No MA	only RCTs	No MA	Y	N	N	N	0	6	M
	1416	N	N	N	N	Y	N	N	PY	PY	only RcTs	N	No MA	only RCTs	No MA	Y	N	N	Y	1	8	L
	1427	N	PY	N	N	Y	Y	N	Y	Y	only RCTs	N	No MA	No MA	No MA	Y	N	N	Y	1	6	L
	1455	Y	PY	N	Y	Y	Y	Y	Y	Y	only RCTs	N	No MA	only RCTs	No MA	Y	Y	N	Y	0	3	M
	1493	N	N	N	N	N	N	N	N	PY	only RCTs	N	N	only RCTs	Y	N	N	N	Y	3	10	CL
	1572	N	N	Y	Y	N	N	N	Y	PY	only RCTs	N	no MA	only RCTs	No MA	Y	N	N	Y	0	8	M
	1587	Y	N	N	N	Y	Y	N	Y	Y	NA - includes only RCTs	N	No MA	No MA	No MA	Y	NA - one study	N	N	1	5	L
	1635	N	N	N	N	N	N	N	PY	PY	NA - includes only RCTs	N	No MA	only RCTs	No MA	N	N	N	N	2	10	CL
	1725	N	N	N	PY	Y	Y	N	Y	Y	Y	N	No MA	No MA	No MA	Y	N	Y	Y	0	7	M
	1801	N	N	N	N	Y	Y	N	N	Y	Y	N	No MA	No MA	No MA	Y	N	N	Y	1	8	L
	1962	Y	N	N	N	N	N	N	Y	PY	PY	N	No MA	No MA	No MA	Y	N	N	N	1	10	L
	SIGN-Cancer pain	N	N	N	Y	N	N	N	N	PY	NA - includes SRs and RCTs	N	No MA	No MA	No MA	Y	N	N	N	0	11	M
	ASCO	N	PY	N	N	Y	Y	N	Y	PY	N	Y	No MA	No MA	No MA	Y	N	N	Y	1	5	L
	CADTH-Jan 5	Y	N	N	N	N	N	N	Y	PY	NA - includes only SRs and RCTs	N	No MA	NA	No MA	N	N	N	N	2	9	CL
	CADTH-Oct 15	Y	N	N	N	N	N	N	Y	PY	NA includes only RCTs	N	No MA	NA includes only RCTs	No MA	Y	N	N	N	1	9	L
	KCE	N	N	N	PY	N	N	Y	Y	Y	N/A	Y	No MA	NA	No MA	Y	N	N	N	0	8	M
	NICE-1	Y	Y	N	PY	N	N	Y	Y	Y	NA - includes only RCTs	N	No MA	NA - only RCTs	No MA	Y	Y	No MA	N	0	6	M
	NICE-2	Y	Y	Y	PY	N	N	Y	PY	Y	Y	Y	No MA	No MA	No MA	Y	Y	N	Y	0	3	M

## Sheet: Outcomes
REF	Outcomes	Pain Outcomes		Bladder outcomes	Neuropathic pain	Central Pain	Chronic Pain	Chronic non-cancer pain	Peripheral pain	Cancer pain	Acute pain	Other pain	Strengthened Circadian Rhythms	Nightmares	Sleep quantity or quality	Insomnia	Nighttime agitation	Sleep disruption	Fatigue	Appetite	Nausea and vomiting	Weight (gain, loss, triceps)	Anorexia	Preference for drug	Satisfaction	Dose of other drugs	Neuropsychiatric symptoms	OCD behaviour	Anxiety and/or depression	Disturbed behaviour	Cognitive function	Mental state/mood	Affect	Spasticity	Gait	Dyskinesia	Tics, temor or chorea	Cramps or spasms	Seizures	Motor symptoms/motricity	Ataxia	Balance/posture	Dystonia	Walking	QoL	HRQoL	Disability scales	Activities of daily living	Global impression of change
12	Maintenance of treatment gains
	QOL																																												1
	utility-based HRQoL																																													1
16	Bladder outcomes	Pain	Not specified	1
	Spasticity																																	1
	Muscle stiffness
	VAS of individual's most troublesome symptom
22	Gait speed																																		1
40	weight gain																					1
	Anxiety																												1
	nightmares													1
	Clinical Global Impression of Cahnge (CGI-C)																																																1
	Clinical improvements
	disturbed behaviour																													1
	Nighttime agitation																1
	strengthened circadian rhythms												1
	neuropsychiatric symptoms																										1
	Cramps																																					1
	Dystonia																																										1
	Torticollos
	chorea severity																																				1
	treatment effect
	dyskinesia																																			1
	motor symptoms																																							1
	QOL																																												1
	activities of daily living																																															1
	OCD behaviour																											1
	Tics																																				1
60		Pain	chronic pain and postoperative pain				1
		Pain	chronic pain									1
		Other (specify in AZ)	Unclear; assume effect on pain
		Neuropathic Pain	N/A		1
		Pain	Cancer pain							1
		Pain	Chronic noncancer pain					1
		Other (specify in AZ)	Acute postoperative pain								1
61	Bladder function	N/A		1
	spasticity																																	1
	spasm																																					1
	motricity																																							1
	cognitive function																														1
	Dizziness (adverse event)	N/A
	Somnolence (adverse event)	N/A
	Headache (adverse event)	N/A
	Nausea (adverse event)	N/A
	Dry mouth (adverse event)	N/A
107	Improvement in anxiety and depression																												1
145		Neuropathic Pain			1
169	HRQoL																																													1
171		Neuropathic Pain			1
		Central Neuropathic Pain				1
		Peripheral Neuropathic Pain							1
	QoL	>/= 30% improvement in pain										1																																	1
	Anxiety	cancer pain								1																			1
	Satisfaction of participants	Pain										1													1
	QST profile (rise in threshholds)
192		Central Neuropathic Pain				1
		Neuropathic Pain	>/= 30% improvement in pain		1
		Pain										1
193	Decrease in number of nocturia episodes			1
	voids per 24h
	Urgency episodes/day
198	Decrease in incontinence episodes			1
	Decrease in number of nocturia episodes
	daytime voids
	voids per 24h
	Urgency episodes/day
208		Neuropathic Pain			1
211		Other (specify in AZ)	cancer pain; not specifically defined in the RCT							1
223		Pain										1
	Anxiety and depression																												1
	fatigue																		1
224		Pain										1
	Sleep disruption																	1
	QoL																																												1
	Impression of global change																																																1
	sensory function
227		Other (specify in AZ)	Acute pain								1
249	Anxiety and depression	Pain										1																	1
	HRQoL																																													1
	fatigue																		1
	Insomnia Severity Index															1
	Profile of Mood States																															1
257	Absence of nausea and vomiting																				1
	Dysphoria
	Feeling "high"
	Sedation
	Participant preference																							1
	Withdrawl due to adverse events
	Dizziness
	Euphoria
	Hallucinations
	Postural Hypotension
	Sedation
	Depression
	Withdrawal due to lack of efficacy
260		Neuropathic Pain	pain relief and pain reduction		1
	effect on dose of other analgesic drugs, including opioids																									1
	QoL																																												1
268		Peripheral Neuropathic Pain							1
283	Nausea and vomiting Complete response	Other (specify in AZ)	neuropathic pain or cancer pain		1					1
	Self-rated health
	Spasticity (Ashworth Scale)																																	1
	Activities of daily living (Barthel index)																																															1
	Walking speed as assessed by timing - WMD																																											1
	Global Impression Patient global impression of change																																																1
	Sleep disturbance																	1
317	Response rate (>100 reduction in Crohn's disease activity index [CDAI] scores																																															1
	QoL																																												1
	remission rate (CDAI <150)
336	mental state outcomes (BPRS and PANNS)																															1
352	spasticity (patient reported)																																	1
	Bladder outcomes	Central Neuropathic Pain	Central pain or painful spasms	1		1
	tremor in MS and tics																																				1
	symptomatic HD treatment
	levodopa-induced dyskinesias																																			1
	seizure frequency																																						1
	discontinuation of medication because of AEs
355	Impact on sleep														1
359	Spasticity	Central Neuropathic Pain				1																												1
	tremor in MS																																				1
	urinary frequency (10 weeks)			1
	Balance																																									1
	Cognition																														1
366	Nausea and Vomiting																				1
	Breathlessness
	Dyskinesia																																			1
	Behavioral disturbances																													1
	Weight Gain																					1
423	change in weight																					1
	change in appetite																			1
	Nausea and vomiting																				1
	Performance																														1
	Mood																															1
	subjective experience of drug effects
		Peripheral Neuropathic Pain							1
	Effect on pharmacokinetics of protease inhibitors
	Effect on viral load and CD4 count
	Resting heart rate
	Skin temperature
450	sleep quality	Pain													1
	Disease activity score
	QoL																																												1
502	Muscle cramp VAS																																					1
513	Sleep	Pain	Movement and Morning Pain									1			1
	Total adverse events	Pain	Total Intensity of Pain
	Withdrawal due to adverse events	Pain	Pain at Present
547	Sleep	Other (specify in AZ)	Various: Central Neuropathic pain, Neuropathic Pain, Fibromyalgia, Spasticity related pain, Allydonia, Hyperalgesia, Sensory Neuropathy												1
		Neuropathy			1
	Rheumatoid Arthritis Disease Activity	Other (specify in AZ)	Neuropathic Pain, Rheumatoid Arthritis, and unclear
		Other (specify in AZ)	Spinal Pain, Fibromyalgia and Spasticity Related Pain									1
	Barthel index for activities of daily living (ADL)																																																1
		Other (specify in AZ)	Central Pain			1
		Analgesia
		Other (specify in AZ)	neuropathic pain with hyperalgesia or allodynia
	FIQ
568		Neuropathic Pain			1
573	nausea and vomiting																				1
593	Itercranial pressure (ICP)
	Glasgow-outcome scale and Disability rating scale																																														1
	Mortality rates
	Activities of daily living (Barthel index)																																															1
	QoL measures																																												1
607	Spasticity																																	1
	Mobility																																							1
	Efficacy
	Ashworth Score
	Walk Time																																											1
	RMI (Rivermead Mobility Index) Score																																							1
612	Tic outcomes																																				1
	Tourette’s Syndrome Symptom List (TSSL) - Patient rated
	Obsessive Compulsive Disorder (TSSL - patient rated)																											1
	Tourette Syndrome Clinical Global Impressions scale (TS-CGI)																																																1
	Shapiro Tourette Syndrome Severity Scale (STSSS)
615		Chronic pain	NA				1
	Euphoria
	Dysphoria
	Events linked to alterations in perception (blurred vision, visual hallucinations, tinnitus, disorientation, confusion, dissociation, acute psychosis)
	Events affecting motor function (speech disorders, ataxia, muscle twitching, numbness)
	Events that altered cognitive function (impaired memory, disturbance in attention, dis- connected thought)
630	body weight and triceps skin fold (measures of anorexia)																					1
	disturbed behaviour																													1
	affect																																1
662	Anti-emetic efficacy																					1
	Preference for Drug																							1
664	Serious Adverse Events
	Death Rate
	Rate of Non-serious Adverse Events
	Average rate of Non-serious Adverse Events
	Average rate of Non-serious Adverse Events
	Average rate of Non-serious Adverse Events
713		Pain										1
714	tremor																																				1
	pain (VAS score)											1
	arm and hand function (9HPT score)																																							1
	ataxia outcomes																																								1
	disability outcomes (MSFC or QoL indicators)																																														1
789	Ashworth Score																																	1
	Brainstem Functioning
	MS Functional Composite Score
	Subjective Global Rating																																																1
	Spasms and Spasticity	Pain																																				1
816	Spasticity	Nociceptive Pain										1																						1
	Subjective improvement of MS symptoms	Other (specify in AZ)	Postoperative pain
	Balance	Other (specify in AZ)	Cancer Pain							1																																1
		Other (specify in AZ)	Abdominal Pain
		Neuropathic Pain			1
824	Airway resistance (raw)
1043		Neuropathic Pain			1
1136	reducing daily analgesic intake	Analgesia	"analgesic effect": related to all types of pain as measured in the studies, including neuropathic pain									1
	level and frequency of dependence	Pain																								1
	anxiety																												1
	sleep														1
	spasticity																																	1
1138		Neuropathic Pain			1
1211	QoL - health state utility	Peripheral Neuropathic Pain	Mean reduction in pain over that of placebo						1																																					1
1336	Number of Incontinence Episodes			1
	Incontinence Quality of Life Questionnaire
1416	quality of sleep	Pain	Pain on movement, pain at rest, McGill pain questionnaire									1			1
	28-joint DAS
1427	weight																					1
	negative affect																																1
	disruptive behaviour																													1
1455	chorea severity																																				1
	functional capacity
	HD staging system
	motor function, cognition and psychological distress (SLC-90R)																												1
1493	global outcome (GOS)																																																1
1572	pulmonary function tests
1587	Therapeutic Effect on L-Dopa induced Dyskinesia																																			1
	Unified Parkinson’s Disease Rating Scale (UPDRS)
	QoL (PDQ-39)																																												1
1635	Appetite																			1
	Weight Gain																					1
	QoL																																												1
1725	Opioid Sparing Effect	Analgesia																								1
	Sleep														1
	Energy	Other (specify in AZ)	Pain Intensity									1
	Social Functioning
1801	Tic outcomes																																				1
1962	Nausea and Vomiting																				1
SIGN-Cancer pain		Neuropathic Pain			1
		Central Neuropathic Pain				1
ASCO	Nausea and Vomiting	Other (specify in AZ)	Chronic Pain (pain NRS score)																		1
CADTH-Jan 5	Static balance																																									1
	Dynamic balance
	Stride length																																											1
CADTH-Oct 15	Clinician-Administered PTSD Scale Recurring and Distressing Dream scores																1
	General Well Being Questionnaire																																												1
	Clinician Global Impression of Change	Pain										1																																					1
		Peripheral Neuropathic Pain							1
	Quality of Sleep														1
	Spasticity																																	1
KCE	Nausea and vomiting outcomes																				1
	Patient's wellness (ECOG)																																												1
	QoL
NICE-1	Patient Reported global improvement	Neuropathic pain			1																																												1
	Sleep														1
	withdrawal due to adverse effects
	Dizziness or Vertigo
	somnolence (including drowsiness and sedation)
	fatigue (or tiredness)
	nausea and vomiting
	burning pain
	cognitive impairment
	mood disturbance
	dry mouth
NICE-2	Spasticity (Ashworth Scale)																																	1
	Function in activities of daily living (Barthel Index)																																															1
	Spasm Severity NRS																																					1
	Timed 10m walk																																											1
	Patient Global Impression of Improvement																																																1
	QoL indices																																												1
	Responders (at least 30% improvement in NRS)
	Adverse events leading to withdrawal
	Weakness
	Nausea
	Somnolence
	Fatigue Severity Score																		1
	Motricity index –arm and leg																																							1
	Guys neurological disability scale																																														1
	TOTALS			7	14	6	2	1	5	5	2	16	1	1	9	1	2	2	3	2	7	7	0	2	1	3	1	2	7	4	3	3	2	11	1	4	8	5	1	6	1	3	1	4	13	4	3	5	10
[truncated: 6 more columns]
