# Supplementary material for: Benefits and harms of medical cannabis: a scoping review of systematic reviews
Source: Syst Rev. 2019 Dec 10;8:320. doi: 10.1186/s13643-019-1243-x (PMC6905063; doi:10.1186/s13643-019-1243-x)
Supplement: Supplementary file 8 — Additional file 8. AMSTAR Scores by Review. [file 13643_2019_1243_MOESM8_ESM.docx]

**Appendix 6: AMSTAR 2 Scores, by Review**

| **Author, Year** | **AMSTAR-2 Criterion** | | | | | | | | | | | | | | | | | |
| --- | --- | --- | --- | --- | --- | --- | --- | --- | --- | --- | --- | --- | --- | --- | --- | --- | --- | --- |
| **Q1** | **Q2** | **Q3** | ***Q4** | **Q5** | **Q6** | **Q7** | **Q8** | ***Q9A** | **Q10** | ***Q11A** | **Q12** | ***Q13** | **Q14** | **Q15** | **Q16** | **Overall score** | |
| Herzog, 20174 | N | PY | N | Y | Y | N | Y | Y | N | Y | No MA | No MA | Y | N | N | Y | **L** |
| Claflin, 201823 | N | N | N | N | N | N | N | Y | PY | N | No MA | No MA | Y | N | N | N | **L** |
| Behm, 201724 | N | N | Y | PY | Y | Y | N | Y | Y | N | No MA for cannabis | No MA for cannabis | N | N | N | N | **L** |
| Kim, 201797 | N | N | N | PY | N | N | N | Y | Y | N | No MA | No MA | Y | N | N | Y | **M** |
| Aviram, 201726 | Y | N | N | PY | N | N | Y | Y | PY | N | Y | Y | PY | Y | N | Y | **M** |
| Da Rovare, 201727 | Y | N | N | Y | Y | Y | N | Y | Y | N | Y | Y | Y | Y | Y | Y | **M** |
| Norton, 201728 | Y | PY | Y | N | N | N | Y | Y | includes only NRSI | N | No MA | No MA | N | N | N | N | **CL** |
| Walsh, 201722 | N | N | N | N | N | N | N | Y | N | N | No MA | No MA | N | N | N | Y | **CL** |
| Snedecor, 201329 | N | N | N | N | Y | Y | N | Y | Y | N | Y | Y | N | Y | N | Y | **CL** |
| Goldenberg, 201730 | N | N | N | PY | Y | N | N | Y | N | N | N | Y | Y | N | N | Y | **L** |
| Meng, 201731 | Y | Y | N | Y | Y | N | N | Y | Y | N | Y | Y | Y | Y | Y | Y | **M** |
| Nugent, 201732 | N | Y | Y | Y | Y | Y | N | Y | Y | N | Y | Y | Y | Y | N | Y | **M** |
| O’Neil, 201733 | Y | Y | N | Y | N | N | N | Y | includes only NRSI | N | No MA | No MA | Y | N | N | Y | **M** |
| Youssef, 201734 | N | Y | N | PY | Y | Y | N | Y | Y | Y | N | Y | Y | N | N | Y | **L** |
| Mehta, 201635 | N | N | N | PY | Y | N | N | PY | Y | N | No MA | No MA | N | N | N | N | **L** |
| van den Beuken-van Everdingen, 201784 | Y | N | N | N | Y | N | N | Y | Y | N | No MA | No MA | N | N | N | N | **CL** |
| Fitzcharles, 201636 | Y | N | N | Y | Y | Y | N | Y | Y | Y | No MA | No MA | Y | N | N | Y | **M** |
| Tateo, 201737 | N | N | N | PY | N | N | N | Y | Y | N | No Ma | No Ma | Y | N | N | N | **M** |
| Stevens, 201738 | Y | Y | N | PY | Y | Y | N | PY | Y | N | No MA | No MA | Y | N | N | Y | **M** |
| Walitt, 201639 | Y | PY | N | Y | Y | Y | Y | Y | Y | Y | No MA | No MA | Y | N | N | Y | **M** |
| Smith, 201540 | Y | PY | N | Y | Y | Y | Y | Y | Y | N | Y | Y | Y | Y | N | Y | **M** |
| Deshpande, 201541 | N | N | N | N | Y | Y | N | Y | Y | N | no MA | no MA | Y | Y | N | N | **L** |
| Andreae, 201542 | Y | Y | Y | PY | Y | Y | Y | Y | Y | Y | Y | Y | Y | N | N | Y | **M** |
| Whiting, 201543 | N | Y | Y | PY | Y | Y | Y | Y | Y | N | Y | Y | Y | Y | N | Y | **M** |
| Langhorst, 201544 | N | PY | N | PY | Y | Y | PY | Y | Y | N | No MA | No MA | Y | N | N | Y | **M** |
| McLoughlin, 201445 | Y | PY | Y | Y | Y | Y | Y | Y | Y | Y | No MA for this question | No MA | Y | Y | Y | Y | **H** |
| Koppel, 201485 | N | N | N | PY | N | N | N | Y | PY | N | N | No MA | Y | N | N | Y | **L** |
| Gates, 201446 | N | N | N | PY | Y | N | N | N | N | N | No MA | No MA | Y | N | N | N | **L** |
| Yadav, 201492 | N | N | N | PY | Y | N | N | Y | Y | N | No MA | No MA | Y | N | N | Y | **M** |
| van den Elsen, 201447 | N | PY | N | PY | Y | N | N | Y | Y | N | No MA | No MA | Y | N | N | N | **M** |
| Lutge, 201348 | Y | N | N | PY | Y | Y | Y | Y | Y | N | No MA | No MA | Y | Y | N | N | **M** |
| Fitzcharles, 201649 | Y | N | N | N | N | Y | N | PY | PY | N | No MA | No MA | Y | N | N | N | **M** |
| Baldinger, 201250 | N | Y | N | N | Y | Y | Y | Y | Y | N | No MA | No MA | Y | Y | N | Y | **L** |
| Richards, 201251 | Y | Y | N | Y | Y | Y | Y | Y | Y | N | No MA | No MA | Y | Y | N | Y | **M** |
| Lynch, 201152 | Y | N | N | PY | N | N | N | PY | PY | N | No MA | No MA | N | N | N | N | **L** |
| Phillips, 201053 | N | N | N | PY | N | N | Y | Y | N | N | N | Y | Y | N | N | Y | **CL** |
| Phillips, 201054 | Y | N | N | PY | Y | Y | Y | Y | PY | Y | No MA | No MA | Y | Y | Y | Y | **M** |
| Meyer, 201055 | N | N | N | PY | N | N | N | N | PY | N | No MA | No MA | Y | N | N | N | **M** |
| Lakhan, 200956 | Y | N | N | PY | N | Y | N | PY | PY | N | No MA | No MA | Y | Y | N | N | **M** |
| Curtis, 200957 | Y | Y | N | PY | N | N | Y | Y | Y | N | No MA | No MA | Y | N | No MA | Y | **M** |
| Martin-Sanchez, 200958 | Y | N | N | PY | N | N | N | Y | PY | N | Y | Y | Y | Y | Y | N | **M** |
| Krishnan, 200959 | Y | N | N | N | N | Y | Y | Y | Y | Y | No MA | No MA | Y | Y | No MA | N | **L** |
| Machado Rocha, 200860 | N | N | N | PY | N | N | N | Y | PY | N | Y | Y | Y | Y | Y | N | **M** |
| Wang, 200861 | N | N | N | N | Y | N | N | Y | PY | N | Y | Y | Y | Y | N | Y | **L** |
| Iskedjian, 200762 | Y | N | N | N | Y | Y | N | Y | PY | N | N | Y | Y | Y | Y | N | **CL** |
| Mills, 200763 | Y | PY | N | N | Y | Y | Y | PY | PY | N | No MA | No MA | Y | N | N | N | **L** |
| Shakespeare, 200364 | Y | Y | N | N | Y | Y | Y | PY | N | N | No MA | No MA | Y | N | N | N | **CL** |
| Campbell, 200165 | Y | N | N | PY | Y | Y | N | Y | PY | N | No MA | No MA | Y | N | N | Y | **M** |
| Huntley, 200066 | N | N | N | PY | N | N | N | PY | Y | N | No MA | No MA | Y | N | N | N | **M** |
| Merlin, 201667 | N | N | N | N | Y | Y | N | Y | N | Y | No MA | No MA | Y | N | N | Y | **CL** |
| Lynch, 201568 | Y | N | N | PY | N | N | N | PY | PY | N | No MA | No MA | N | N | N | N | **L** |
| Finnerup, 201569 | Y | PY | N | PY | Y | Y | N | PY | PY | N | Y | Y | Y | Y | Y | Y | **M** |
| Snedecor, 201370 | N | N | N | PY | Y | Y | N | Y | Y | N | Y | N | N | Y | N | Y | **L** |
| Kuspinar, 201271 | Y | N | Y | PY | Y | Y | N | Y | Y | N | N | N | Y | N | N | Y | **L** |
| Gloss, 201472 | Y | PY | N | Y | Y | Y | Y | PY | Y | N | No MA | No MA | Y | N | N | N | **M** |
| Macfarlane, 201173 | N | N | N | N | Y | N | N | PY | PY | N | No MA | No MA | Y | N | N | Y | **L** |
| Hanson, 201174 | N | PY | N | N | Y | Y | N | Y | Y | N | No MA | No MA | Y | N | N | Y | **L** |
| Mestre, 200975 | Y | PY | N | Y | Y | Y | Y | Y | Y | N | No MA | No MA | Y | Y | N | Y | **M** |
| Wheaton, 200976 | N | N | N | N | N | N | N | N | PY | N | N | Y | N | N | N | Y | **CL** |
| Singh, 200777 | N | N | Y | Y | N | N | N | Y | PY | N | No MA | No MA | Y | N | N | Y | **M** |
| Chung, 200678 | Y | N | N | N | Y | Y | N | Y | Y | N | No MA | No MA | Y | NA - one study | N | N | **L** |
| Yavuzsen, 200579 | N | N | N | N | N | N | N | PY | PY | N | No MA | No MA | N | N | N | N | **CL** |
| Nielsen, 201780 | N | N | N | PY | Y | Y | N | Y | Y | N | No MA | No MA | Y | N | Y | Y | **M** |
| Pringsheim, 201286 | N | N | N | N | Y | Y | N | N | Y | N | No MA | No MA | Y | N | N | Y | **L** |
| CADTH, 201481 | Y | N | N | N | N | N | N | Y | PY | N | No MA | No MA | Y | N | N | N | **L** |
| SIGN, 200887 | N | N | N | Y | N | N | N | N | PY | N | No MA | No MA | Y | N | N | N | **M** |
| Paice (American Society of Clinical Oncology), 201688 | N | PY | N | N | Y | Y | N | Y | PY | Y | No MA | No MA | Y | N | N | Y | **L** |
| Staples, CADTH, 201883 | Y | N | N | N | N | N | N | Y | PY | N | No MA | No MA | N | N | N | N | **CL** |
| CADTH, 20116 | Y | N | N | N | N | N | N | Y | PY | N | No MA | No MA | Y | N | N | N | **L** |
| Verleye, The Belgian Health Care Knowledge Centre (KCE), 201289 | N | N | N | PY | N | N | Y | Y | Y | Y | No MA | No MA | Y | N | N | N | **M** |
| NICE, 201390 | Y | Y | N | PY | N | N | Y | Y | Y | N | No MA | No MA | Y | Y | No MA | N | **M** |
| NICE, 201491 | Y | Y | Y | PY | N | N | Y | PY | Y | Y | No MA | No MA | Y | Y | N | Y | **M** |

*critical question; Y-yes; N-no; PY-partial yes; MA-meta-analysis; NRSI-non randomised study of interventions; M-moderate; L-low; CL-critically low; SIGN-Scottish Intercollegiate Guidelines Network; CADTH-Canadian Agency for Drugs and Technologies in Health; NICE-National Institute for Health and Care Excellence
